# Supplementary material for: Structural Basis of 2-Phenylamino-4-phenoxyquinoline Derivatives as Potent HIV-1 Non-Nucleoside Reverse Transcriptase Inhibitors
Source: MDPI journal article supplement (doi:10.3390/molecules27020461), 2022-01-11
Supplement: s1 [file s1]

## Supplementary Materials

### Structural basis of 2-phenylamino-4-phenoxyquinoline derivatives as potent HIV-1 non-nucleoside reverse transcriptase inhibitors

Arthit Makarasen<sup>1</sup>, Suwicha Patnin<sup>1</sup>, Pongsit Vijitphan<sup>1</sup>, Nanthawan Reukngam<sup>1</sup>, Panita Khlaychan<sup>1</sup>, Mayuso Kuno<sup>3</sup>, Pakamas Intachote<sup>2</sup>, Busakorn Saimanee<sup>2</sup>, Suchada Sengsai<sup>2</sup>, Supanna Techasakul<sup>1\*</sup>

<sup>1</sup> Department of Chemistry, Laboratory of Organic Synthesis, Chulabhorn Research Institute, Laksi, Bangkok 10210, Thailand; suwicha@cri.or.th (S.P.); pongsit@cri.or.th (P.V.); nanthawan@cri.or.th (N.R.); panita@cri.or.th (P.K.);

<sup>2</sup> Biological Activity Test and Screening Unit, Central Facilities, Chulabhorn Research Institute, Laksi, Bangkok 10210, Thailand; pakamas@cri.or.th (P.I.); busakorn@cri.or.th (B.S.); suchada@cri.or.th (S.S.)

<sup>3</sup> Department of Chemistry, Faculty of Science, Srinakharinwirot University, Wattana, Bangkok 10110, Thailand; apinyac@g.swu.ac.th (A.C.); mayuso@g.swu.ac.th (M.K.)

\* Correspondence: supanna@cri.or.th (S.T.)

**General procedure for the preparation of 2-chloro-4-phenoxyquinoline (2a-2d).** A mixture of 2,4-dichloroquinoline (**1**, 10 mmol) and hydroxyl benzene (11 mmol) in dimethylformamide (DMF, 30 mL) with anhydrous cesium carbonate ( $\text{Cs}_2\text{CO}_3$ , 20 mmol) was heated in a sealed tube, stirred at 80 °C for 16 h, and cooled. Then, the mixture was poured into ice-water and extracted thrice with ethyl acetate. The combined organic layers were washed with saturated NaCl and dried over  $\text{Na}_2\text{SO}_4$ . The crude product was purified on a silica gel column (eluent: hexane/ethyl acetate) to obtain **2a-2d** with 62%–69% yield. However, 4-chloro-2-phenoxyquinoline (**3a-3d**) was also found during the reaction progress as a side product with 5%–14% yield.

**4-(4'-formylphenoxy)-2-chloroquinoline (2)** With 67% yield, the synthesis started with 0.30 g (1.51 mmol) of **1** to obtain 0.29 g of **2a**, which consisted of white solid and mp. 113.9 °C -114.2 °C. The  $^1\text{H}$ -NMR (300 MHz,  $\text{CDCl}_3$ ): 6.64 (s, 1H, ArH-3), 7.35 (d, 2H, J = 8.7 Hz, ArH-2', 6'), 7.61 (td, 1H, J = 7.8, 1.2 Hz, ArH-6), 7.81 (td, 1H, J = 7.8, 1.2 Hz, ArH-7), 8.04 (m, 3H, ArH-8, 3', 5'), and 8.26 (dd, 1H, J = 8.4, 0.9 Hz, ArH-5), and 10.1 (s, 1H, CHO). The  $^{13}\text{C}$ -NMR (75 MHz,  $\text{CDCl}_3$ ): 106.5, 120.4, 121.0, 121.8, 126.9, 128.5, 131.6, 132.3, 134.0, 149.0, 151.0, 159.1, 161.9, and 190.5. Finally, the HRMS (+ESI) was  $\text{C}_{16}\text{H}_{11}\text{ClNO}_2 [\text{M}+\text{H}]^+$ ; it requires 284.0478, but has 284.0465. **2-(4'-formylphenoxy)-4-chloroquinoline (3a)** obtained as the side product with 11 % yield (47.2 mg), which consisted of white solid and mp. 121.7 °C -122.5 °C. The  $^1\text{H}$ -NMR (300 MHz,  $\text{CDCl}_3$ ): 7.26 (s, 1H, ArH-3), 7.41 (dd, 2H, J = 8.6, 1.8 Hz, ArH-2', 6'), 7.53 (td, 1H, J = 7.6, 1.2 Hz, ArH-6), 7.68 (td, 1H, J = 7.7, 1.4 Hz, ArH-7), 7.79 (dd, 1H, J = 8.4, 0.5 Hz, ArH-8), 7.95 (dt, 2H, J = 8.6, 2.4 Hz, ArH-3', 5'), 8.16 (dd, 1H, J = 8.3, 1.0 Hz, ArH-5), and 10.0 (s, 1H, CHO). The  $^{13}\text{C}$ -NMR (75 MHz,  $\text{CDCl}_3$ ): 112.9, 121.6, 124.0, 124.2, 126.1, 128.2, 131.0, 131.4, 133.1, 145.2, 146.4, 158.5, 159.9 and 190.9. Finally, the HRMS (+ESI) was  $\text{C}_{16}\text{H}_{11}\text{ClNO}_2 [\text{M}+\text{H}]^+$ ; it requires 284.0478, but has 284.0468.

**4-(2',6'-Dimethyl-4'-formylphenoxy)-2-chloroquinoline (2b)** With 69% yield, the synthesis started with 1.0 g (5.05 mmol) of **1** to obtain 1.09 g of **2b**, which consisted of white solid and mp. 154.6 °C -156.9 °C. The  $^1\text{H}$ -NMR (300 MHz,  $\text{CDCl}_3$ ): 2.23 (s, 6H,  $\text{ArCH}_3$ -2', 6'), 6.20 (s, 1H, ArH-3), 7.65 (td, 1H, J = 7.5, 1.2 Hz, ArH-6), 7.75 (s, 2H, ArH-3', 5'), 7.82 (td, 1H, J = 7.5, 1.2 Hz, ArH-7), 8.04 (dd, 1H, J = 8.3, 0.9 Hz, ArH-8), and 8.4 (dd, 1H, J = 8.3, 0.9 Hz, ArH-5), and 10.0 (s, 1H, CHO). The  $^{13}\text{C}$ -NMR (75 MHz,  $\text{CDCl}_3$ ): 16.1, 102.9, 119.5, 121.7, 126.7, 128.5, 131.5, 132.1, 134.4, 148.8, 151.3, 154.6, 161.0, and 191.2. Finally, the HRMS (+ESI) was  $\text{C}_{18}\text{H}_{15}\text{ClNO}_2 [\text{M}+\text{H}]^+$ ; it requires 312.0791, but has 312.0791. **2-(2',6'-Dimethyl-4'-formylphenoxy)-4-chloroquinoline (3b)** obtained as the side product with 14 % yield (0.22 g), which consisted of white solid and mp. 113.7 °C -114.2 °C. The  $^1\text{H}$ -NMR (300 MHz,  $\text{CDCl}_3$ ): 2.21 (s, 6H,  $\text{ArCH}_3$ -2', 6'), 7.27 (d, 1H, J = 5.8 Hz, ArH-3), 7.50

(td, 1H,  $J = 7.4, 1.7$  Hz, ArH-6), 7.60-7.70 (m, 4H, ArH-7, 8, 3', 5'), 8.15 (dd, 1H,  $J = 8.5, 0.8$  Hz, ArH-5), and 9.99 (s, 1H, CHO). The  $^{13}\text{C}$ -NMR (75 MHz,  $\text{CDCl}_3$ ): 16.7, 111.5, 123.8, 124.0, 125.6, 128.2, 130.3, 130.9, 132.5, 133.7, 145.2, 146.9, 155.3, 159.7 and 191.7. Finally, the HRMS (+ESI) was  $\text{C}_{18}\text{H}_{15}\text{ClNO}_2$   $[\text{M}+\text{H}]^+$ ; it requires 312.0791, but has 312.0777.

**4-(4'-cyanophenoxy)-2-chloroquinoline (2c)** With 60% yield, the synthesis started with 0.30 g (1.51 mmol) of **1** to obtain 0.26 g of **2c**, which consisted of white solid and mp. 214.1 °C -215.0 °C. The  $^1\text{H}$ -NMR (300 MHz,  $\text{CDCl}_3$ ): 6.63 (s, 1H, ArH-3), 7.32 (d, 2H,  $J = 8.7$  Hz, ArH-2', 6'), 7.60 (t, 1H,  $J = 7.2$  Hz, ArH-6), 7.78-7.83 (m, 3H, ArH-7, 3', 5'), 8.02 (d, 1H,  $J = 8.4$  Hz, ArH-8), and 8.22 (d, 1H,  $J = 8.4$  Hz, ArH-5). The  $^{13}\text{C}$ -NMR (75 MHz,  $\text{CDCl}_3$ ): 106.4, 109.6, 117.9, 119.6, 120.2, 121.2, 121.6, 126.9, 128.4, 131.5, 134.4, 134.7, 148.8, 150.8, 157.6, 161.5. Finally, the HRMS (+ESI) was  $\text{C}_{16}\text{H}_{10}\text{ClN}_2\text{O}$   $[\text{M}+\text{H}]^+$ ; it requires 281.0482, but has 281.0470. **2-(4'-cyanophenoxy)-4-chloroquinoline (3c)** obtained as the side product with 9 % yield (38.3 mg), which consisted of white solid and mp. 147.0 °C -148.0 °C. The  $^1\text{H}$ -NMR (300 MHz,  $\text{CDCl}_3$ ): 7.27 (d, 1H,  $J = 5.7$  Hz, ArH-3), 7.39 (dt, 2H,  $J = 8.4, 0.8$  Hz, ArH-2', 6'), 7.56 (td, 1H,  $J = 7.3, 1.3$  Hz, ArH-6), 7.65-7.82 (m, 4H, ArH-7, 8, 3', 5'), and 8.18 (dd, 1H,  $J = 8.1, 0.9$  Hz, ArH-5). The  $^{13}\text{C}$ -NMR (75 MHz,  $\text{CDCl}_3$ ): 108.4, 112.8, 118.6, 122.1, 124.1, 124.3, 126.3, 128.2, 131.1, 133.8, 145.4, 146.4, 156.9 and 159.7. Finally, the HRMS (+ESI) was  $\text{C}_{16}\text{H}_{10}\text{ClN}_2\text{O}$   $[\text{M}+\text{H}]^+$ ; it requires 281.0482, but has 281.0475.

**4-(2',6'-Dimethyl-4'-cyanophenoxy)-2-chloroquinoline (2d)** With 62% yield, the synthesis started with 0.30 g (1.51 mmol) of **1** to obtain 0.29 g of **2d**, which consisted of white solid and mp. 184.3 °C -185.0 °C. The  $^1\text{H}$ -NMR (300 MHz,  $\text{CDCl}_3$ ): 2.20 (s, 6H,  $\text{ArCH}_3$ -2', 6'), 6.20 (s, 1H, ArH-3), 7.53 (s, 2H, ArH-3', 5'), 7.65 (td, 1H,  $J = 9.2, 1.5$  Hz, ArH-6), 7.83 (td, 1H,  $J = 9.2, 1.5$  Hz, ArH-7), 8.04 (dd, 1H,  $J = 8.3, 1.2$  Hz, ArH-8), and 8.38 (dd, 1H,  $J = 8.3, 1.2$  Hz, ArH-5). The  $^{13}\text{C}$ -NMR (75 MHz,  $\text{CDCl}_3$ ): 15.9, 102.7, 110.4, 118.1, 119.3, 121.6, 126.8, 128.4, 131.5, 132.7, 133.3, 148.8, 151.1, 153.2, and 160.7. Finally, the HRMS (+ESI) was  $\text{C}_{18}\text{H}_{14}\text{ClN}_2\text{O}$   $[\text{M}+\text{H}]^+$ ; it requires 309.0795, but has 309.0783. **2-(2',6'-Dimethyl-4'-cyanophenoxy)-4-chloroquinoline (3d)** obtained as the side product with 5 % yield (23.4 mg), which consisted of white solid and mp. 152.2 °C -153.0 °C. The  $^1\text{H}$ -NMR (300 MHz,  $\text{CDCl}_3$ ): 2.16 (s, 6H,  $\text{ArCH}_3$ -2', 6'), 7.29 (s, 1H, ArH-3), 7.44 (s, 2H, ArH-3', 5'), 7.51 (td, 1H,  $J = 7.3, 2.2$  Hz, ArH-6), 7.60-7.69 (m, 2H, ArH-7, 8) and 8.16 (d, 1H,  $J = 8.2$  Hz, ArH-5). The  $^{13}\text{C}$ -NMR (75 MHz,  $\text{CDCl}_3$ ): 16.6, 109.1, 111.5, 118.9, 123.9, 124.0, 125.7, 128.1, 130.9, 132.5, 133.0, 145.3, 146.7, 153.9 and 159.4. Finally, the HRMS (+ESI) was  $\text{C}_{18}\text{H}_{14}\text{ClN}_2\text{O}$   $[\text{M}+\text{H}]^+$ ; it requires 309.0795, but has 309.0787.

**General procedure for the preparation of 2,4-diphenoxyquinoline (4a-4d).** A mixture of **1** (10 mmol) and hydroxyl benzene (21 mmol) in DMF (30 mL) with anhydrous  $\text{Cs}_2\text{CO}_3$

(20 mmol) was heated in a sealed tube, stirred at 120 °C for 8–16 h, and cooled. Afterward, the mixture was poured into ice-water and extracted thrice with ethyl acetate. The combined organic layers were washed with saturated NaCl and dried over Na<sub>2</sub>SO<sub>4</sub>. The crude product was purified on a silica gel column (eluent: hexane/ethyl acetate) to obtain **4a–4d** with 55%–65% yield.

**2,4-di-(4'-formylphenoxy)-quinoline (4a)** With 60% yield, the synthesis started with 50.0 mg (0.25 mmol) of **1** to obtain 55.9 mg of **4a**, which consisted of white solid and mp. 164.9 °C - 165.5 °C. The <sup>1</sup>H-NMR (300 MHz, CDCl<sub>3</sub>): 6.43 (s, 1H, ArH-3), 7.36-7.43 (m, 4H, ArH-2', 6', 2'', 6''), 7.51 (td, 1H, J = 7.6, 1.3 Hz, ArH-6), 7.71 (td, 1H, J = 8.1, 1.5 Hz, ArH-7), 7.80 (dd, 1H, J = 8.4, 0.5 Hz, ArH-8), 7.94 (ddd, 2H, J = 8.7, 2.0 Hz, ArH-3', 5'), 8.03 (ddd, 2H, J = 8.7, 2.0 Hz, ArH-3'', 5''), 8.22 (dd, 1H, J = 8.3, 0.9 Hz, ArH-5), 10.00 (s, 1H, CHO) and 10.04 (s, 1H, CHO). The <sup>13</sup>C-NMR (75 MHz, CDCl<sub>3</sub>): 97.2, 119.7, 120.9, 121.5, 121.7, 125.3, 127.9, 131.1, 131.4, 132.2, 132.9, 133.7, 147.3, 158.7, 159.5, 161.3, 163.2, 190.5 and 191.0. Finally, the HRMS (+ESI) was C<sub>23</sub>H<sub>16</sub>NO<sub>4</sub> [M+H]<sup>+</sup>; it requires 370.1079, but has 370.1088.

**2,4-di-(2',6'-Dimethyl-4'-formylphenoxy)-quinoline (4b)** With 65 % yield, the synthesis started with 50 mg (0.25 mmol) of **1** to obtain 69.7 mg of **4b**, which consisted of white solid and mp. 120.5 °C - 121.0 °C. The <sup>1</sup>H-NMR (300 MHz, CDCl<sub>3</sub>): 2.16 (s, 6H, ArCH<sub>3</sub>-2', 6'), 2.29 (s, 6H, ArCH<sub>3</sub>-2'', 6''), 5.99 (s, 1H, ArH-3), 7.46-7.51 (m, 1H, ArH-6), 7.63-7.66 (m, 4H, ArH-3', 5', 7, 8), 7.76 (s, 2H, ArH-3'', 5''), 8.35 (d, 1H, J = 8.1 Hz, ArH-5), 9.95 (s, 1H, CHO) and 10.02 (s, 1H, CHO). The <sup>13</sup>C-NMR (75 MHz, CDCl<sub>3</sub>): 16.1, 16.7, 91.7, 118.5, 121.6, 124.5, 127.7, 130.2, 130.7, 130.9, 132.2, 132.4, 133.4, 134.2, 147.5, 155.0, 155.6, 161.3, 162.1, 191.3 and 191.7. Finally, the HRMS (+ESI) was C<sub>27</sub>H<sub>24</sub>NO<sub>4</sub> [M+H]<sup>+</sup>; it requires 426.1700, but has 426.1690.

**2,4-di-(4'-cyanophenoxy)-quinoline (4c)** With 55 % yield, the synthesis started with 50 mg (0.25 mmol) of **1** to obtain 50.4 mg of **4c**, which consisted of white solid and mp. 220.9 °C - 221.5 °C. The <sup>1</sup>H-NMR (300 MHz, CDCl<sub>3</sub>): 6.40 (s, 1H, ArH-3), 7.30-7.40 (m, 4H, ArH-2', 6', 2'', 6''), 7.51 (td, 1H, J = 7.5, 1.3 Hz, ArH-6), 7.66-7.75 (m, 3H, ArH-7, 3', 5'), 7.75-7.84 (m, 3H, ArH-8, 3'', 5'') and 8.18 (dd, 1H, J = 8.0, 0.7 Hz, ArH-5). The <sup>13</sup>C-NMR (75 MHz, CDCl<sub>3</sub>): 97.1, 108.2, 109.4, 118.0, 118.6, 119.6, 121.3, 121.6, 122.0, 125.5, 127.8, 131.3, 133.7, 134.7, 147.2, 157.0, 158.1, 161.0 and 163.0. Finally, the HRMS (+ESI) was C<sub>23</sub>H<sub>14</sub>N<sub>3</sub>O<sub>2</sub> [M+H]<sup>+</sup>; it requires 364.1086, but has 364.1067.

**2,4-di-(2',6'-Dimethyl-4'-cyanophenoxy)-quinoline (4d)** With 57 % yield, the synthesis started with 50 mg (0.25 mmol) of **1** to obtain 60.3 g of **4d**, which consisted of white solid and mp. 201.8 °C - 202.4 °C. The <sup>1</sup>H-NMR (300 MHz, CDCl<sub>3</sub>): 2.10 (s, 6H, ArCH<sub>3</sub>-2',

6'), 2.24 (s, 6H, ArCH<sub>3</sub>-2'', 6''), 5.96 (s, 1H, ArH-3), 7.41 (s, 2H, ArH-3', 5'), 7.46-7.52 (m, 1H, ArH-6), 7.54 (bs, 2H, ArH-3'', 5''), 7.64-7.66 (m, 2H, ArH-7, 8) and 8.32 (d, 1H, J = 8.3 Hz, ArH-5). The <sup>13</sup>C-NMR (75 MHz, CDCl<sub>3</sub>): 16.0, 16.5, 91.6, 102.8, 108.9, 110.2, 118.3, 118.4, 119.0, 121.5, 121.6, 124.7, 126.8, 127.8, 128.5, 130.9, 131.6, 132.4, 132.8, 133.0, 133.3, 147.4, 153.7, 154.1, 161.0 and 162.0. Finally, the HRMS (+ESI) was C<sub>27</sub>H<sub>22</sub>N<sub>3</sub>O<sub>2</sub> [M+H]<sup>+</sup>; it requires 420.1706, but has 420.1712.

**General procedure for the preparation of 2-phenylamino-4-phenoxy-quinoline (5a–5d and 6a–6d).** A mixture of **2a–2d** (0.5 mmol), 4-aminobenzonitrile (0.65 mmol) for the synthesis of **5a–5d** or 2-amino-5-cyanopyridine (0.65 mmol) for the synthesis of **6a–6d**, Pd(OAc)<sub>2</sub> (0.05 mmol), SPhos (0.05 mmol), and Cs<sub>2</sub>CO<sub>3</sub> (0.75 mmol) in DMF (20 mL) was stirred, heated at 120 °C for 5–10 h, and cooled. Then, the corresponding solution was evaporated in vacuo. The residue was purified on a silica gel column (eluent: hexane/ethyl acetate) to obtain **5–6(a–d)** with 59%–72% yield. The dimers of biquinoline, namely, 4,4'-di-(4'-formylphenoxy)-2,2'-biquinoline (**7a**) and 4,4'-di-(2',6'-dimethyl-4'-formylphenoxy)-2,2'-biquinoline (**7b**), were found during the syntheses of **5a**, **5b**, **6a**, and **6b**.

**4-(4'-formylphenoxy)-2-(4''-cyanophenyl)-aminoquinoline (5a).** With 62% yield, the synthesis started with 70.0 mg (0.25 mmol) of **2a** to obtain 55.9 mg of **5a**, which consisted of white solid and mp. 267.1 °C–268.0 °C. **5a** was obtained in 41.5 % overall yield (2 steps from **1**). The <sup>1</sup>H-NMR (300 MHz, DMSO-d<sub>6</sub>): 6.42 (s, 1H, ArH-3), 7.43 (t, 1H, J = 7.1 Hz, ArH-6), 7.50-7.59 (m, 2H, ArH-2'', 6''), 7.66-7.88 (m, 4H, ArH-3'', 5'', 2', 6'), 8.04-8.15 (m, 5H, ArH-5, 7, 8, 3', 5'), 9.80 (bs, 1H, NH), and 10.10 (s, 1H, CHO). The <sup>13</sup>C-NMR (75 MHz, DMSO-d<sub>6</sub>): 97.8, 102.0, 117.6, 117.9, 119.6, 121.2, 123.6, 126.7, 130.7, 132.1, 133.1, 133.5, 145.4, 148.1, 154.1, 159.1, 160.4 and 191.9. Finally, the HRMS (+ESI) was C<sub>23</sub>H<sub>16</sub>N<sub>3</sub>O<sub>2</sub> [M+H]<sup>+</sup>; it requires 366.1237, but has 366.1229.

**4-(2',6'-Dimethyl-4'-formylphenoxy)-2-(4''-cyanophenyl)-aminoquinoline (5b).** With 69% yield, the synthesis started with 40.0 mg (0.13 mmol) of **2b** to obtain 34.8 mg of **5b**, which consisted of white solid and mp. 291.3 °C–292.2 °C. **5b** was obtained in 47.6 % overall yield (2 steps from **1**). The <sup>1</sup>H-NMR (300 MHz, CDCl<sub>3</sub>): 2.26 (s, 6H, ArCH<sub>3</sub>-2', 6'), 5.73 (s, 1H, ArH-3), 6.95 (bs, 1H, NH), 7.46 (td, 1H, J = 7.6, 1.0 Hz, ArH-6), 7.56 (m, 2H, ArH-2'', 6''), 7.70 (s, 2H, ArH-3', 5'), 7.74 (m, 1H, ArH-7), 7.87 (m, 2H, ArH-3'', 5''), 7.91 (d, 1H, J = 8.6 Hz, ArH-8), 8.30 (dd, 1H, J = 8.2, 1.1 Hz, ArH-5), and 9.96 (s, 1H, CHO). The <sup>13</sup>C-NMR (75 MHz, CDCl<sub>3</sub>): 16.1, 93.1, 104.0, 117.6, 118.2, 119.5, 121.5, 123.9, 127.3, 130.9, 132.5, 133.2, 134.1, 144.6, 148.7, 153.5, 155.2, 160.7, and 191.4. Finally, the HRMS (+ESI) was C<sub>25</sub>H<sub>20</sub>N<sub>3</sub>O<sub>2</sub> [M+H]<sup>+</sup>; it requires 394.1550, but has 394.1559.

**4-(4'-cyanophenoxy)-2-(4''-cyanophenyl)-aminoquinoline (5c).** With 59% yield, the synthesis started with 70.0 mg (0.25 mmol) of **2c** to obtain 53.3 mg of **5c**, which consisted of white solid and mp. 278.5 °C - 278.7 °C. **5c** was obtained in 35.4 % overall yield (2 steps from **1**). The <sup>1</sup>H-NMR (300 MHz, CDCl<sub>3</sub>): 6.59 (s, 1H, ArH-3), 7.17-7.31 (m, 4H, ArH-2'', 6'', 2', 6'), 7.47-7.54 (m, 1H, ArH-6), 7.58-7.80 (m, 7H, ArH-7, 8, 3'', 5'', 3', 5', NH) and 8.08 (d, 1H, J = 7.9 Hz, ArH-5). The <sup>13</sup>C-NMR (75 MHz, CDCl<sub>3</sub>): 103.9, 108.5, 118.1, 119.8, 119.9, 121.6, 125.9, 126.9, 128.0, 131.1, 133.2, 134.4, 147.8, 148.7, 156.0, 158.7, and 160.2. Finally, the HRMS (+ESI) was C<sub>23</sub>H<sub>15</sub>N<sub>4</sub>O [M+H]<sup>+</sup>; it requires 363.1240, but has 363.1232.

**4-(2',6'-Dimethyl-4'-cyanophenoxy)-2-(4''-cyanophenyl)-aminoquinoline (5d).** With 60% yield, the synthesis started with 70.0 mg (0.23 mmol) of **2c** to obtain 53.0 mg of **5d**, which consisted of white solid and mp. 256.5 °C - 257.0 °C. **5d** was obtained in 37.2 % overall yield (2 steps from **1**). The <sup>1</sup>H-NMR (300 MHz, CDCl<sub>3</sub>): 2.23 (s, 6H, ArCH<sub>3</sub>-2', 6'), 5.81 (s, 1H, ArH-3), 7.41-7.46 (m, 1H, ArH-6), 7.47 (s, 2H, ArH-3', 5'), 7.56 (dd, 2H, J = 7.1, 1.8 Hz, ArH-2'', 6''), 7.71 (m, 2H, ArH-7, NH), 7.87-7.99 (m, 3H, ArH-8, 3'', 5''), and 8.27 (dd, 1H, J = 8.2, 1.1 Hz, ArH-5). The <sup>13</sup>C-NMR (75 MHz, CDCl<sub>3</sub>): 16.0, 93.3, 103.6, 109.4, 117.4, 118.2, 119.6, 121.3, 123.8, 127.2, 130.9, 133.0, 133.1, 133.2, 144.8, 148.6, 153.8, 154.0, and 160.2. Finally, the HRMS (+ESI) was C<sub>25</sub>H<sub>19</sub>N<sub>4</sub>O [M+H]<sup>+</sup>; it requires 391.1553, but has 391.1548.

**4-(4'-formylphenoxy)-2-(5''-cyanopyridin-2''ylamino)quinoline (6a).** With 60 % yield, the synthesis started with 70 mg (0.25 mmol) of **2a** to obtain 54.2 mg of **6a**, which consisted of white solid and mp. 248.0 °C - 249.0 °C. **5a** was obtained in 40 % overall yield (2 steps from **1**). The <sup>1</sup>H-NMR (300 MHz, CDCl<sub>3</sub>): 6.77 (s, 1H, ArH-3), 7.34 (d, 2H, J = 8.6 Hz, ArH-2', 6'), 7.46 (td, 1H, J = 7.6, 0.8 Hz, ArH-3''), 7.74 (td, 1H, J = 7.7, 1.4 Hz, ArH-6), 7.83-7.95 (m, 3H, ArH-7, 8, NH), 7.97-8.06 (m, 2H, ArH-3', 5'), 8.14 (dd, 1H, J = 8.6, 0.8 Hz, ArH-5), 8.33-8.49 (m, 2H, ArH-4'', 6'') and 10.0 (s, 1H, CHO). The <sup>13</sup>C-NMR (75 MHz, CDCl<sub>3</sub>): 98.6, 112.1, 117.5, 120.6, 121.7, 124.7, 127.2, 130.4, 131.3, 132.1, 133.5, 140.8, 151.8, 152.2, 161.7 and 190.5. Finally, the HRMS (+ESI) was C<sub>22</sub>H<sub>15</sub>N<sub>4</sub>O<sub>2</sub> [M+H]<sup>+</sup>; it requires 367.1190, but has 367.1176.

**4-(2',6'-Dimethyl-4'-formylphenoxy)-2-(5''-cyanopyridin-2''ylamino)quinoline (6b).** With 65 % yield, the synthesis started with 50 mg (0.16 mmol) of **2b** to obtain 41.1 mg of **6b**, which consisted of white solid and mp. 275.7 °C - 276.5 °C. **6b** was obtained in 45 % overall yield (2 steps from **1**). The <sup>1</sup>H-NMR (300 MHz, DMSO-d<sub>6</sub>): 2.20 (s, 6H, ArCH<sub>3</sub>-2', 6'), 6.58 (s, 1H, ArH-3), 7.52 (t, 1H, J = 7 Hz, ArH-3''), 7.77 (td, 1H, J = 7.8, 1.6 Hz, ArH-6), 7.82-7.91 (m, 3H, ArH-7, 3', 5'), 8.14 (dd, 1H, J = 8.8, 2.3 Hz, ArH-8), 8.29 (d, 1H, J = 7.5 Hz, ArH-5), 8.57 (d, 1H, J = 1.9 Hz, ArH-4''), 8.65 (d, 1H, J = 8.9 Hz, ArH-6''), 10.03 (s, 1H, CHO)

and 10.37 (s, 1H, NH). The  $^{13}\text{C}$ -NMR (75 MHz, DMSO- $d_6$ ): 15.6, 94.8, 97.5, 100.3, 111.8, 117.2, 117.9, 121.3, 124.2, 126.8, 130.7, 130.9, 131.9, 134.1, 141.1, 145.9, 151.9, 153.4, 154.5, 155.9, 159.7 and 160.4. Finally, the HRMS (+ESI) was  $\text{C}_{24}\text{H}_{19}\text{N}_4\text{O}_2$   $[\text{M}+\text{H}]^+$ ; it requires 395.1502, but has 395.1500.

**4-(4'-cyanophenoxy)-2-(5''-cyanopyridin-2''ylamino)quinoline (6c).** With 60 % yield, the synthesis started with 50 mg (0.18 mmol) of **2c** to obtain 38.8 mg of **5c**, which consisted of white solid and mp. 225.7 °C – 225.9 °C. **6c** was obtained in 36 % overall yield (2 steps from **1**). The  $^1\text{H}$ -NMR (300 MHz,  $\text{CDCl}_3$ ): 6.86 (s, 1H, ArH-3), 7.30 (d, 2H,  $J = 8.8$  Hz, ArH-2', 6'), 7.46 (td, 1H,  $J = 7.6$  Hz, ArH-3''), 7.70-7.81 (m, 3H, ArH-6, 3', 5'), 7.83-7.94 (m, 2H, ArH-7, 8), 8.11 (dd, 1H,  $J = 8.4, 0.7$ , ArH-5), 8.30 (bs, 2H, ArH-4'', NH) and 8.46 (d, 1H,  $J = 1.7$  Hz, ArH-6''). The  $^{13}\text{C}$ -NMR (75 MHz,  $\text{CDCl}_3$ ): 98.8, 102.0, 112.3, 117.4, 118.1, 120.9, 121.7, 124.9, 131.5, 134.6, 140.8, 140.9 and 151.7. Finally, the HRMS (+ESI) was  $\text{C}_{22}\text{H}_{14}\text{N}_5\text{O}$   $[\text{M}+\text{H}]^+$ ; it requires 364.1193, but has 364.1193.

**4-(2',6'-Dimethyl-4'-cyanophenoxy)-2-(5''-cyanopyridin-2''ylamino)quinoline (6d).** With 72% yield, the synthesis started with 50 mg (0.16 mmol) of **2c** to obtain 45.6 mg of **5d**, which consisted of white solid and mp. 229.4 °C - 230.3 °C. **5d** was obtained in 45 % overall yield (2 steps from **1**). The  $^1\text{H}$ -NMR (300 MHz,  $\text{CDCl}_3$ ): 2.21 (s, 6H,  $\text{ArCH}_3$ -2', 6'), 6.12 (s, 1H, ArH-3), 7.43-7.57 (m, 3H, ArH-3'', 3', 5'), 7.75 (td, 1H,  $J = 7.8, 1.4$  Hz, ArH-6), 7.82-7.97 (m, 2H, ArH-7, 8), 8.23-8.44 (m, 3H, ArH-5, 4'', NH) and 8.58 (d, 1H,  $J = 8.3$  Hz, ArH-6''). The  $^{13}\text{C}$ -NMR (75 MHz,  $\text{CDCl}_3$ ): 15.9, 93.8, 101.7, 110.0, 112.3, 117.5, 117.7, 118.2, 121.5, 124.5, 127.2, 131.1, 132.9, 133.1, 140.8, 148.3, 151.6, 152.5, 153.6, 155.7 and 160.6. Finally, the HRMS (+ESI) was  $\text{C}_{24}\text{H}_{18}\text{N}_5\text{O}$   $[\text{M}+\text{H}]^+$ ; it requires 392.1506, but has 392.1494.

**4,4'-di-(4'-formylphenoxy)-2,2'-biquinoline (7a)** With the little amount during the synthesis process to produce compound **5a** and **6a**, which consisted of white solid and mp. 288.7 °C – 289.3 °C. The  $^1\text{H}$ -NMR (300 MHz,  $\text{CDCl}_3$ ): 7.33-7.42 (m, 4H,  $2\times\text{ArH}$ -2', 6'), 7.59 (td, 2H,  $J = 7.7, 1.1$  Hz,  $2\times\text{ArH}$ -3), 7.76 (td, 2H,  $J = 7.7, 1.4$  Hz,  $2\times\text{ArH}$ -6), 7.98-8.06 (m, 4H,  $2\times\text{ArH}$ -3', 7'), 8.11 (d, 2H,  $J = 8.3$  Hz,  $2\times\text{ArH}$ -8), 8.21-8.30 (m, 4H,  $2\times\text{ArH}$ -5, 5') and 10.0 (s, 2H,  $2\times\text{CHO}$ ). The  $^{13}\text{C}$ -NMR (75 MHz,  $\text{CDCl}_3$ ): 105.1, 120.1, 121.7, 122.1, 127.2, 129.8, 130.4, 130.5, 132.2, 133.1, 149.6, 157.0, 160.4, 160.7 and 190.8. Finally, the HRMS (+ESI) was  $\text{C}_{32}\text{H}_{21}\text{N}_2\text{O}_4$   $[\text{M}+\text{H}]^+$ ; it requires 497.1496, but has 497.1491.

**4,4'-di-(2',6'-Dimethyl-4'-formylphenoxy)-2,2'-biquinoline (7b)** With the little amount during the synthesis process to produce compound **5b** and **6b**, which consisted of white solid and mp. 300.0 °C (decomposed). The  $^1\text{H}$ -NMR (300 MHz,  $\text{CDCl}_3 + \text{CD}_3\text{OD}$ ): 2.27 (s, 12H,  $2\times\text{ArCH}_3$ -2', 6'), 7.55 (s, 2H,  $2\times\text{ArH}$ -3), 7.59-7.69 (m, 2H,  $2\times\text{ArH}$ -6), 7.71-7.86 (m, 6H,  $2\times\text{ArH}$ -7, 3', 5'), 8.04 (d, 2H,  $J = 8.3$  Hz,  $2\times\text{ArH}$ -8), 8.45 (d, 2H,  $J = 8.1$  Hz,  $2\times\text{ArH}$ -5)

and 10.0 (s, 2H, 2×CHO). The  $^{13}\text{C}$ -NMR (75 MHz,  $\text{CDCl}_3 + \text{CD}_3\text{OD}$ ): 16.1, 100.0, 120.5, 121.4, 126.7, 129.3, 130.3, 130.9, 132.4, 133.9, 149.0, 155.3, 157.1 and 160.1. Finally, the HRMS (+ESI) was  $\text{C}_{36}\text{H}_{29}\text{N}_2\text{O}_4 [\text{M}+\text{H}]^+$ ; it requires 553.2122, but has 553.2116.

**General procedure for the preparation of 2-phenoxy-4-phenylamine-quinoline (8a–8d).** A mixture of 4-chloro-2-phenoxyquinoline **3a–3d** (0.5 mmol), 4-aminobenzonitrile (0.65 mmol),  $\text{Pd}(\text{OAc})_2$  (0.05 mmol), SPhos (0.05 mmol), and  $\text{Cs}_2\text{CO}_3$  (0.75 mmol) in DMF (20 mL) was stirred, heated at 120 °C for 6 h, and cooled. The corresponding solution was evaporated in vacuo. The residue was purified on a silica gel column (eluent: hexane/ethyl acetate) to obtain **8a–8d** with 57%–66% yield.

**2-(4'-formylphenoxy)-4-(4''-cyanophenyl)-aminoquinoline (8a).** With 58% yield, the synthesis started with 50 mg (0.18 mmol) of **3a** to obtain 37.4 mg of **8a**, which consisted of white solid and mp. 238.5 °C – 238.9 °C. **8a** was obtained in 6 % overall yield (2 steps from **1**). The  $^1\text{H}$ -NMR (400 MHz,  $\text{CDCl}_3 + \text{CD}_3\text{OD}$ ): 6.95 (s, 1H, ArH-3), 7.36–7.40 (m, 2H, ArH-2'', 6''), 7.41–7.45 (m, 3H, ArH-2', 6', NH), 7.50 (td, 1H, J = 6.0, 2.0 Hz, ArH-6), 7.64–7.71 (m, 3H, ArH-7, 3'', 5''), 7.79 (d, 1H, J = 8.0, 2.0 Hz, ArH-8), 7.95 (dt, 2H, J = 8.0, 2.0 Hz, ArH-3', 5'), 8.13 (d, 1H, J = 8.0 Hz, ArH-5), and 9.97 (s, 1H, CHO). The  $^{13}\text{C}$ -NMR (75 MHz,  $\text{CDCl}_3 + \text{CD}_3\text{OD}$ ): 95.0, 104.6, 113.8, 118.8, 119.2, 119.8, 120.2, 121.1, 124.6, 127.5, 130.3, 131.4, 132.1, 133.4, 145.3, 146.9, 149.5, 159.6, 161.3 and 191.4. Finally, the HRMS (+ESI) was  $\text{C}_{23}\text{H}_{16}\text{N}_3\text{O}_2 [\text{M}+\text{H}]^+$ ; it requires 366.1237, but has 366.1244.

**2-(2',6'-Dimethyl-4'-formylphenoxy)-4-(4''-cyanophenyl)-aminoquinoline (8b).** With 66% yield, the synthesis started with 50 mg (0.16 mmol) of **3b** to obtain 41.6 mg of **8b**, which consisted of white solid and mp. 200.0 °C – 201.3 °C. **8b** was obtained in 9 % overall yield (2 steps from **1**). The  $^1\text{H}$ -NMR (300 MHz,  $\text{CDCl}_3$ ): 2.21 (s, 6H,  $\text{ArCH}_3$ -2', 6'), 6.86 (s, 1H, NH), 6.98 (s, 1H, ArH-3), 7.35 (s, 1H, ArH-3'), 7.36 (s, 1H, ArH-5') 7.42 (td, 1H, J = 7.6, 1.5 Hz, ArH-6'), 7.60 (td, 1H, J = 7.5, 1.2 Hz, ArH-7), 7.63–7.73 (m, 5H, ArH-8, 2'', 3'', 5'', 6''), 7.85 (d, 1H, J = 7.8 Hz, ArH-5), 9.97 (s, 1H, CHO). The  $^{13}\text{C}$ -NMR (75 MHz,  $\text{CDCl}_3$ ): 16.8, 94.3, 105.9, 118.6, 118.9, 119.7, 119.8, 124.4, 128.9, 130.3, 132.6, 133.5, 133.9, 144.8, 147.7, 147.8, 155.7, 161.3 and 191.8. Finally, the HRMS (+ESI) was  $\text{C}_{25}\text{H}_{20}\text{N}_3\text{O}_2 [\text{M}+\text{H}]^+$ ; it requires 394.1550, but has 394.1542.

**2-(4'-cyanophenoxy)-4-(4''-cyanophenyl)-aminoquinoline (8c).** With 57% yield, the synthesis started with 50 mg (0.18 mmol) of **3c** to obtain 36.8 mg of **8c**, which consisted of white solid and mp. 187.5 °C – 188.0 °C. **8c** was obtained in 5 % overall yield (2 steps from **1**). The  $^1\text{H}$ -NMR (400 MHz,  $\text{CD}_3\text{OD}$ ): 6.87 (s, 1H, ArH-3), 7.37 (d, 2H, J = 8.8 Hz, ArH-2'', 6''), 7.45–7.47 (m, 1H, ArH-6), 7.49 (d, 2H, J = 8.8 Hz, ArH-2', 6'), 7.56–7.58 (m, 1H, ArH-7), 7.61–7.65 (m, 1H, ArH-8), 7.76 (d, 2H, J = 8.8 Hz, ArH-3'', 5''), 7.85 (d, 2H, J = 8.8 Hz,

ArH-3', 5'), 8.25 (d, 1H, J = 8.0 Hz, ArH-5) and 9.49 (s, 1H, NH). The  $^{13}\text{C}$ -NMR (100 MHz, DMSO- $d_6$ ): 95.1, 104.4, 107.3, 119.2, 119.7, 119.7, 120.5, 122.6, 122.9, 124.9, 128.2, 131.0, 134.2, 134.5, 146.1, 147.2, 149.7, 158.0 and 161.9. Finally, the HRMS (+ESI) was  $\text{C}_{23}\text{H}_{15}\text{N}_4\text{O}$   $[\text{M}+\text{H}]^+$ ; it requires 363.1240, but has 363.1245.

**2-(2',6'-Dimethyl-4'-cyanophenoxy)-4-(4''-cyanophenyl)-aminoquinoline (8d).** With 60% yield, the synthesis started with 50 mg (0.16 mmol) of **3d** to obtain 37.9 mg of **7d**, which consisted of white solid and mp. 201.3 °C – 202.0 °C. **8d** was obtained in 3 % overall yield (2 steps from **1**). The  $^1\text{H}$ -NMR (400 MHz,  $\text{CDCl}_3$ ): 2.16 (s, 6H, ArCH $_3$ -2', 6'), 6.98 (s, 1H, ArH-3), 7.02 (bs, 1H, NH), 7.38-7.44 (m, 5H, ArH-6, 2'', 3'', 5'', 6''), 7.58-7.65 (m, 2H, ArH-7, 8), 7.69 (d, 2H, J = 12 Hz, ArH-3', 5') and 7.89 (d, 1H, J = 8.0 Hz, ArH-5). The  $^{13}\text{C}$ -NMR (100 MHz,  $\text{CDCl}_3$ ): 16.0, 94.0, 105.8, 108.7, 114.4, 118.7, 118.9, 119.1, 119.8, 120.0, 124.5, 128.8, 130.3, 132.4, 133.1, 133.8, 133.8, 144.8, 147.5, 148.0, 154.3, and 161.1. Finally, the HRMS (+ESI) was  $\text{C}_{25}\text{H}_{19}\text{N}_4\text{O}$   $[\text{M}+\text{H}]^+$ ; it requires 391.1553, but has 391.1561.

**General procedure for the preparation of 9b, 10b, and 11b.** Potassium tert-butoxide (1.50 mmol) was added to an ice-cooled solution of diethyl cyanomethyl phosphonate (1.50 mmol) in THF (20 mL). The mixture was stirred at 0 °C for 30 min and then at room temperature for another 30 min. A solution of 4-(4'-formylphenoxy)-2-arylamino-quinoline (**5b** and **6b**) or 2-(4'-formylphenoxy)-4-phenylamino-quinoline (**8b**, 1 mmol) in THF (13 mL) was added dropwise to the reaction mixture. The solution was continued for 8-10 h. After the reaction was completed, the corresponding solution was added with water and extracted with ethyl acetate. The organic layer was dried over  $\text{Na}_2\text{SO}_4$  and concentrated under reduced pressure. The residue was purified on a silica gel column (eluent: hexane/ethyl acetate) to obtain **9b**, **10b**, and **11b** with 56%–64% yield. The E:Z isomer ratio for **9b** and **10b** was 7:3, whereas **11b** was inseparable.

**4-(4'-(2''-(E, Z)-cyanovinyl)-2',6'-dimethyl-phenoxy)-2-(4''-cyanophenyl)-aminoquinoline (9b).** With 64% yield (E: Z isomer; 7: 3), the synthesis started with 100 mg (0.25 mmol) of **5b** to obtain 67.9 mg of **9b** which was obtained in 30 % overall yield (3 steps from **1**).

In the case of Z-isomer; Z-isomer consisted of white solid and mp. 217.3 °C – 217.9 °C. The  $^1\text{H}$ -NMR (300 MHz,  $\text{CDCl}_3$ ): 2.20 (s, 6H, ArCH $_3$ -2', 6'), 5.47 (d, 1H, J = 12.1, Vinyl-H), 5.74 (s, 1H, ArH-3), 6.78 (bs, 1H, NH), 7.12 (d, 1H, J = 12.1 Hz, Vinyl-H), 7.45 (td, 1H, J = 7.4, 1.1 Hz, ArH-6), 7.52-7.66 (m, 4H, ArH-3', 5', 2'', 6''), 7.71 (td, 1H, J = 7.7, 1.4 Hz, ArH-7), 7.81-7.94 (m, 3H, ArH-8, 3'', 5'') and 8.29 (dd, 1H, J = 8.3, 1.0 Hz, ArH-5). The  $^{13}\text{C}$ -NMR (75 MHz,  $\text{CDCl}_3$ ): 16.1, 93.0, 95.2, 104.0, 117.3, 117.7, 118.2, 119.5, 121.6, 123.9, 127.2, 128.4,

130.1, 130.9, 131.5, 131.9, 133.2, 144.6, 147.9, 148.6, 152.1, 153.5 and 161.1 Finally, the HRMS (+ESI) was  $C_{27}H_{21}N_4O$   $[M+H]^+$ ; it requires 417.1710, but has 417.1712.

In the case of E-isomer; E-isomer consisted of white solid and mp. 214.4 °C – 215.1 °C. The  $^1H$ -NMR (300 MHz,  $CDCl_3+CD_3OD$ ): 2.20 (s, 6H,  $ArCH_3$ -2', 6'), 5.82 (s, 1H, ArH-3), 5.92 (d, 1H, J = 16.6 Hz, Vinyl-H), 7.30 (s, 2H, ArH-3', 5'), 7.41 (d, 1H, J = 16.6 Hz, Vinyl-H), 7.40-7.48 (m, 1H, ArH-6), 7.56 (d, 2H, J = 8.7 Hz, ArH-2'', 6''), 7.66-7.76 (m, 1H, ArH-7), 7.84-7.94 (m, 3H, ArH-8, 3'', 5'') and 8.28 (dd, 1H, J = 8.1, 1.0 Hz, ArH-5). The  $^{13}C$ -NMR (75 MHz,  $CDCl_3+CD_3OD$ ): 15.8, 93.2, 95.9, 102.9, 117.48, 117.9, 119.6, 121.3, 123.5, 126.8, 128.2, 130.6, 131.2, 132.1, 133.0, 145.1, 148.4, 149.8, 152.5, 154.0 and 160.7. Finally, the HRMS (+ESI) was  $C_{27}H_{21}N_4O$   $[M+H]^+$ ; it requires 417.1710, but has 417.1712.

**4-(4'-(2''-(E, Z)-cyanovinyl)-2',6'-dimethyl-phenoxy)-2-(5''-cyanopyridin-2''ylamino)-aminoquinoline (10b).** With 60% yield (E: Z isomer; 7: 3), the synthesis started with 100 mg (0.25 mmol) of **6b** to obtain 63.5 mg of **10b** which was obtained in 27 % overall yield (3 steps from **1**).

In the case of Z-isomer; Z-isomer consisted of white solid and mp. 239.6 °C – 239.9 °C. The  $^1H$ -NMR (300 MHz,  $CDCl_3$ ): 2.20 (s, 6H,  $ArCH_3$ -2', 6'), 5.49 (d, 1H, J = 12.1 Hz, Vinyl-H), 6.11 (s, 1H, ArH-3), 7.13 (d, 1H, J = 12.1 Hz, Vinyl-H), 7.49 (t, 1H, J = 7.7 Hz, ArH-3''), 7.64 (s, 2H, ArH-3', 5'), 7.74 (td, 1H, J = 7.6, 1.2 Hz, ArH-6), 7.81-7.95 (m, 3H, ArH-5, 7, 8), 8.07 (bs, 1H, NH), 8.27-8.43 (m, 3H, ArH-5, 4'') and 8.58 (d, 1H, J = 8.6 Hz, ArH-6''). The  $^{13}C$ -NMR (75 MHz,  $CDCl_3$ ): 16.1, 93.9, 95.2, 96.5, 112.2, 117.2, 117.6, 118.0, 121.7, 124.3, 127.2, 128.4, 130.1, 131.0, 131.6, 131.8, 140.7, 147.7, 148.3, 149.5, 151.6, 152.0, 152.5, 155.7 and 161.2. Finally, the HRMS (+ESI) was  $C_{26}H_{20}N_5O$   $[M+H]^+$ ; it requires 418.1662, but has 418.1657.

In the case of E-isomer; E-isomer consisted of white solid and mp. 236.6 °C – 237.4 °C. The  $^1H$ -NMR (300 MHz,  $CDCl_3+CD_3OD$ ): 2.21 (s, 6H,  $ArCH_3$ -2', 6'), 5.93 (d, 1H, J = 16.7 Hz, Vinyl-H), 6.28 (s, 1H, ArH-3), 7.32 (s, 2H, ArH-3', 5'), 7.41 (d, 1H, J = 16.7 Hz, Vinyl-H), 7.46-7.55 (td, 1H, J = 7.6, 1.0 Hz, ArH-3''), 7.69-7.78 (m, 1H, ArH-6), 7.81-7.93 (m, 2H, ArH-7, 8), 8.28-8.39 (m, 2H, ArH-5, 4'') and 8.53 (s, 1H, ArH-6''). The  $^{13}C$ -NMR (75 MHz,  $CDCl_3+CD_3OD$ ): 15.8, 96.0, 100.9, 117.5, 117.9, 121.5, 124.2, 128.2, 129.1, 130.8, 131.2, 131.9, 140.5, 149.7, 151.3, 152.3 and 160.9. Finally, the HRMS (+ESI) was  $C_{26}H_{20}N_5O$   $[M+H]^+$ ; it requires 418.1662, but has 418.1657.

**2-(4'-(2''-(E, Z)-cyanovinyl)-2',6'-dimethyl-phenoxy)-4-(4''-cyanophenyl)-aminoquinoline (11b).** With 56 % yield, the synthesis started with 60 mg (0.15 mmol) of **8b** to obtain 35.6 mg of **11b**, which consisted of white solid and mp. 180.7 °C – 182.3 °C. **10b** was obtained in 5 % overall yield (3 steps from **1**). The  $^1H$ -NMR (300 MHz,  $CDCl_3$ ,

E, Z mixture): 2.16 (s, 6H, ArCH<sub>3</sub>-2', 6'), 5.80 (d, 1H, J = 16.5, Vinyl-H), 6.89-6.99 (m, 1H, ArH-3), 7.20 (s, 1H, ArH-3', 5'), 7.29-7.39 (m, 3H, Vinyl-H, ArH-2'', 6''), 7.54-7.63 (m, 2H, ArH-3'', 5''), 7.63-7.70 (m, 3H, ArH-6, 7, 8) and 7.86 (d, 1H, J = 8.3 Hz, ArH-5). The <sup>13</sup>C-NMR (75 MHz, CDCl<sub>3</sub>, E, Z mixture): 16.8, 93.8, 94.2, 94.3, 95.1, 105.6, 105.7, 117.6, 118.5, 118.7, 119.0, 119.6, 119.7, 119.9, 124.3, 127.8, 128.8, 129.5, 130.3, 130.4, 130.6, 132.1, 132.3, 133.9, 144.9, 147.7, 148.3, 150.4, 152.6, 153.1, 161.5 and 161.6. Finally, the HRMS (+ESI) was C<sub>27</sub>H<sub>21</sub>N<sub>4</sub>O [M+H]<sup>+</sup>; it requires 417.1710, but has 417.1701.

## Scheme 1

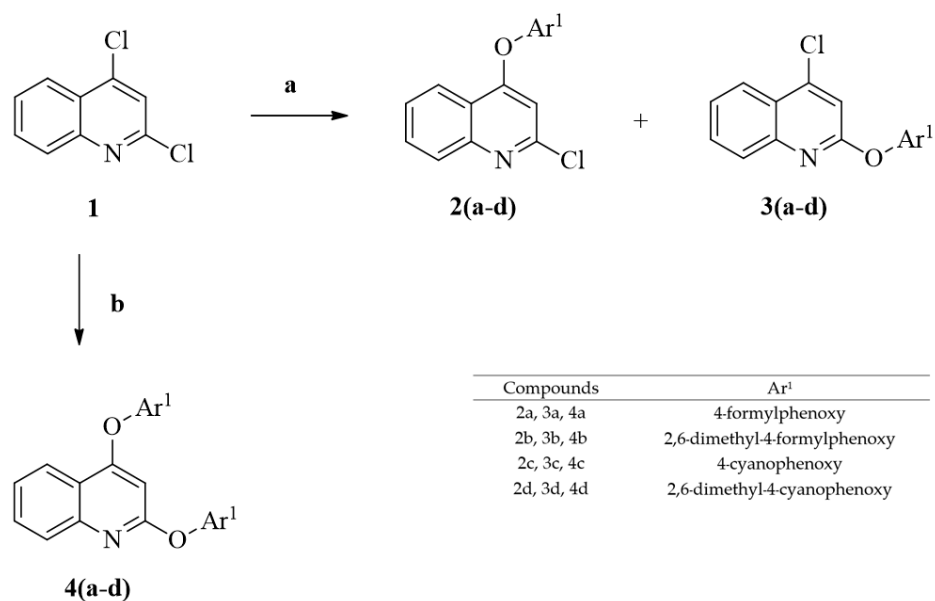

Synthesis of 2-chloro-4-phenoxyquinoline (**2a-2d**), 4-chloro-2-phenoxyquinoline (**3a-3d**), 2,4-diphenoxyquinoline (**4a-4d**). Reagents and conditions: a. hydroxyl benzene ( $\text{Ar}^1\text{-OH}$ , 1.1 eq.),  $\text{Cs}_2\text{CO}_3$  (2.0 eq), DMF, 80 °C sealed tube; b. hydroxyl benzene ( $\text{Ar}^1\text{-OH}$ , 2.1 eq.),  $\text{Cs}_2\text{CO}_3$  (2.0 eq.), DMF, 120 °C sealed tube.

### 4-(4'-formylphenoxy)-2-chloroquinoline (2a)

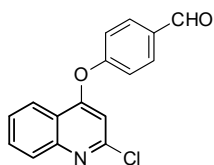

Analysis:

Mp. 113.9-114.2 °C

$^1\text{H-NMR}$  (300 MHz,  $\text{CDCl}_3$ ): 6.64 (s, 1H, ArH-3), 7.35 (d, 2H,  $J = 8.7$  Hz, ArH-2', 6'), 7.61 (td, 1H,  $J = 7.8, 1.2$  Hz, ArH-6), 7.81 (td, 1H,  $J = 7.8, 1.2$  Hz, ArH-7), 8.04 (m, 3H, ArH-8, 3', 5'), and 8.26 (dd, 1H,  $J = 8.4, 0.9$  Hz, ArH-5), and 10.1 (s, 1H, CHO)

$^{13}\text{C-NMR}$  (75 MHz,  $\text{CDCl}_3$ ): 106.5, 120.4, 121.0, 121.8, 126.9, 128.5, 131.6, 132.3, 134.0, 149.0, 151.0, 159.1, 161.9, 190.5

HRMS (+ESI):  $\text{C}_{16}\text{H}_{11}\text{ClNO}_2$   $[\text{M}+\text{H}]^+$  requires 284.0478, found 284.0465

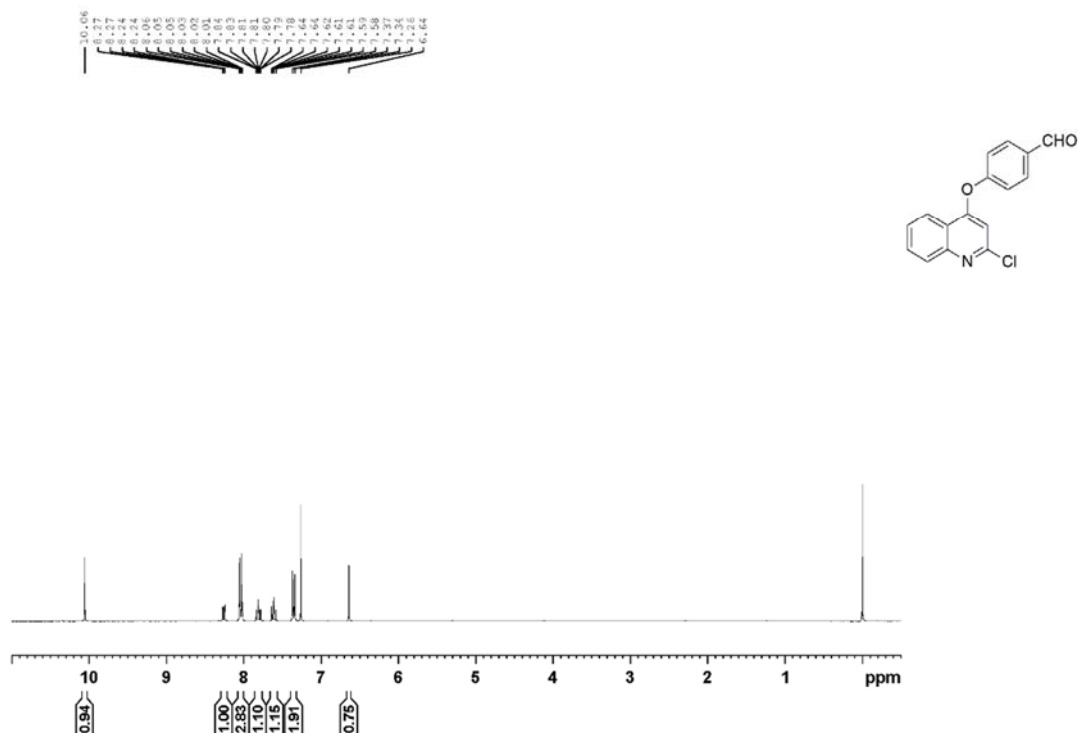

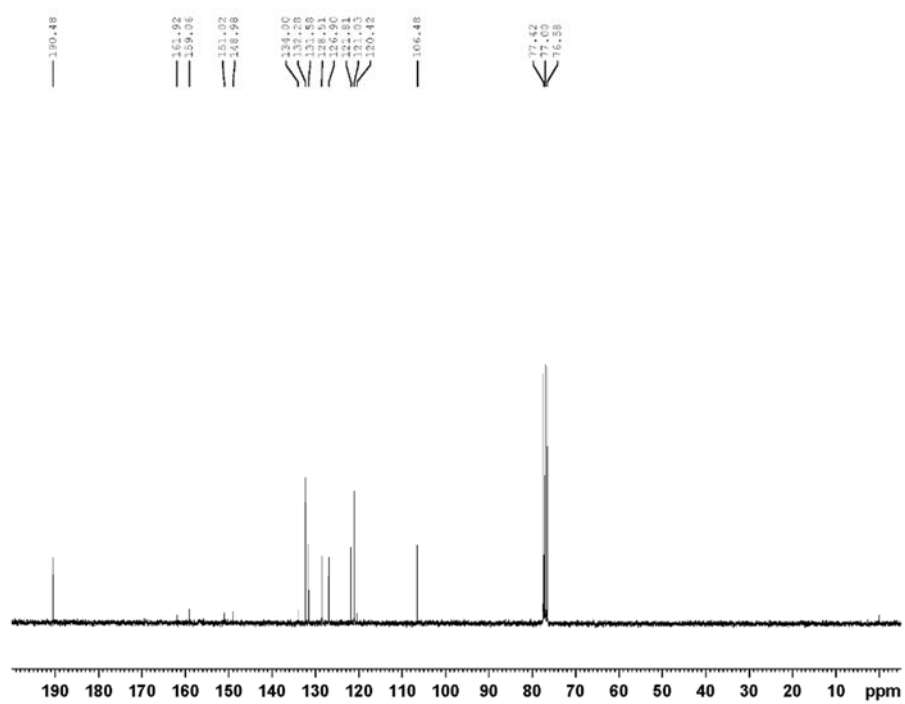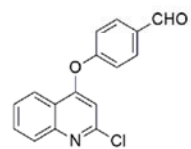

#### 4-(2',6'-Dimethyl-4'-formylphenoxy)-2-chloroquinoline (2b)

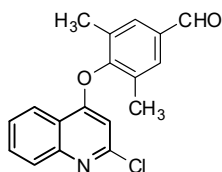

Analysis:

Mp. 154.6-156.9 °C

$^1\text{H-NMR}$  (300 MHz,  $\text{CDCl}_3$ ): 2.23 (s, 6H,  $\text{ArCH}_3$ -2', 6'), 6.20 (s, 1H,  $\text{ArH}$ -3), 7.65 (td, 1H,  $J = 7.5, 1.2$  Hz,  $\text{ArH}$ -6), 7.75 (s, 2H,  $\text{ArH}$ -3', 5'), 7.82 (td, 1H,  $J = 7.5, 1.2$  Hz,  $\text{ArH}$ -7), 8.04 (dd, 1H,  $J = 8.3, 0.9$  Hz,  $\text{ArH}$ -8), and 8.4 (dd, 1H,  $J = 8.3, 0.9$  Hz,  $\text{ArH}$ -5), and 10.0 (s, 1H, CHO)

$^{13}\text{C-NMR}$  (75 MHz,  $\text{CDCl}_3$ ): 16.1, 102.9, 119.5, 121.7, 126.7, 128.5, 131.5, 132.1, 134.4, 148.8, 151.3, 154.6, 161.0, 191.2

HRMS (+ESI):  $\text{C}_{18}\text{H}_{15}\text{ClNO}_2$   $[\text{M}+\text{H}]^+$  requires 312.0791, found 312.0791

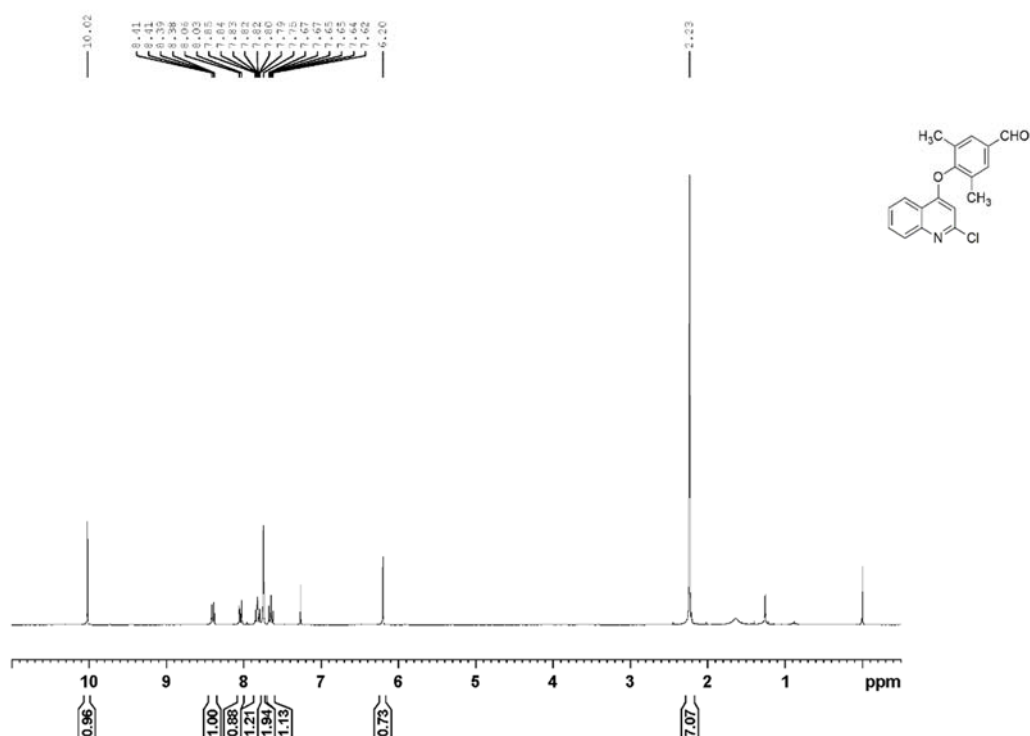

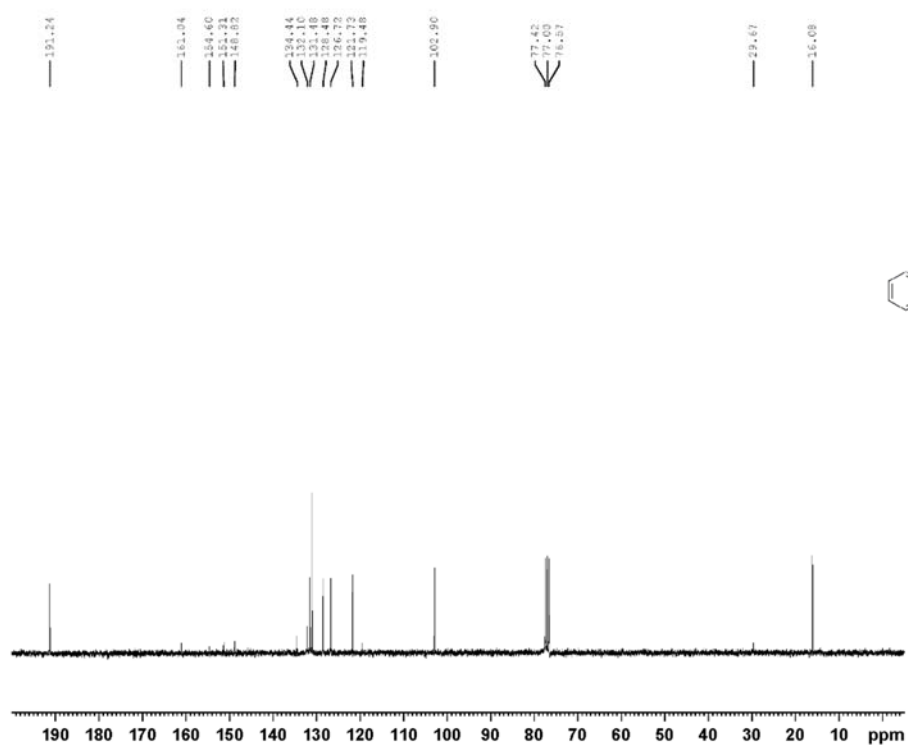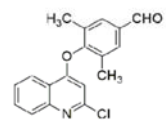

### 4-(4'-cyanophenoxy)-2-chloroquinoline (2c)

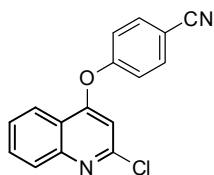

Analysis:

Mp. 214.1-215.0 °C

$^1\text{H-NMR}$  (300 MHz,  $\text{CDCl}_3$ ): 6.63 (s, 1H, ArH-3), 7.32 (d, 2H,  $J = 8.7$  Hz, ArH-2', 6'), 7.60 (t, 1H,  $J = 7.2$  Hz, ArH-6), 7.78-7.83 (m, 3H, ArH-7, 3', 5'), 8.02 (d, 1H,  $J = 8.4$  Hz, ArH-8), and 8.22 (d, 1H,  $J = 8.4$  Hz, ArH-5)

$^{13}\text{C-NMR}$  (75 MHz,  $\text{CDCl}_3$ ): 106.4, 109.6, 117.9, 119.6, 120.2, 121.2, 121.6, 126.9, 128.4, 131.5, 134.4, 134.7, 148.8, 150.8, 157.6, 161.5

HRMS (+ESI):  $\text{C}_{16}\text{H}_{10}\text{ClN}_2\text{O}$   $[\text{M}+\text{H}]^+$  requires 281.0482, found 281.0470

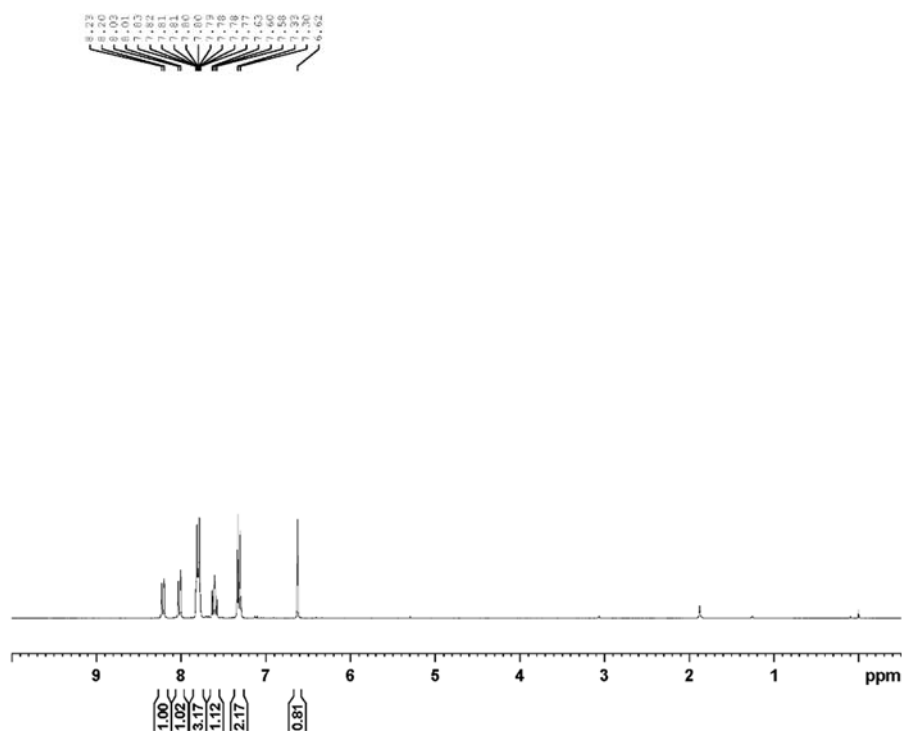

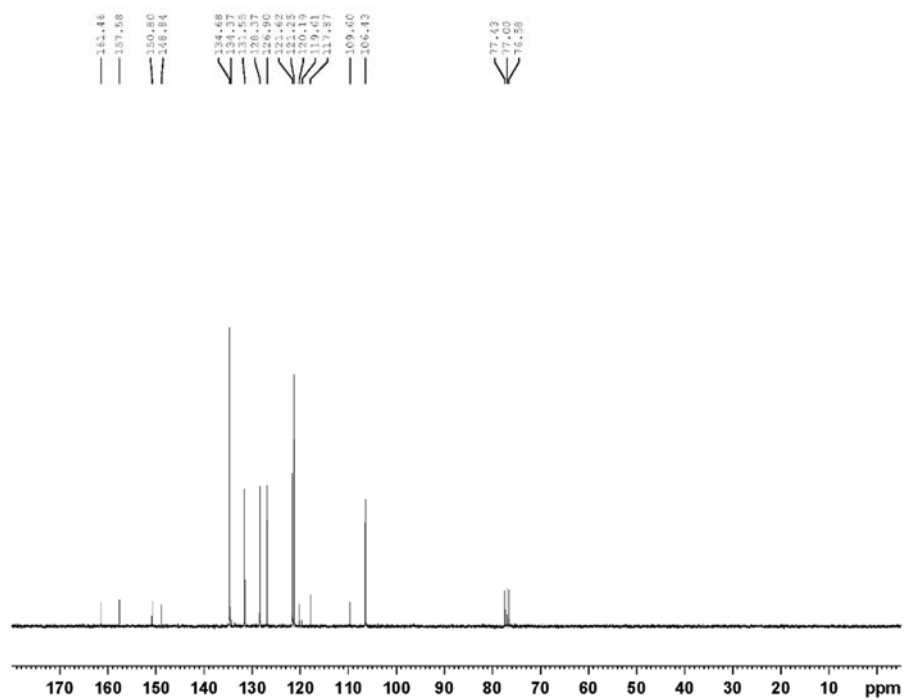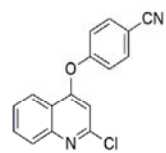

**4-(2',6'-Dimethyl-4'-cyanophenoxy)-2-chloroquinoline (2d)**

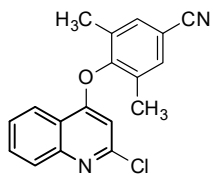

Analysis:

Mp. 184.3-185.0 °C

$^1\text{H-NMR}$  (300 MHz,  $\text{CDCl}_3$ ): 2.20 (s, 6H,  $\text{ArCH}_3$ -2', 6'), 6.20 (s, 1H,  $\text{ArH}$ -3), 7.53 (s, 2H,  $\text{ArH}$ -3', 5'), 7.65 (td, 1H,  $J = 9.2, 1.5$  Hz,  $\text{ArH}$ -6), 7.83 (td, 1H,  $J = 9.2, 1.5$  Hz,  $\text{ArH}$ -7), 8.04 (dd, 1H,  $J = 8.3, 1.2$  Hz,  $\text{ArH}$ -8), and 8.38 (dd, 1H,  $J = 8.3, 1.2$  Hz,  $\text{ArH}$ -5)

$^{13}\text{C-NMR}$  (75 MHz,  $\text{CDCl}_3$ ): 15.9, 102.7, 110.4, 118.1, 119.3, 121.6, 126.8, 128.4, 131.5, 132.7, 133.3, 148.8, 151.1, 153.2, 160.7

HRMS (+ESI):  $\text{C}_{18}\text{H}_{14}\text{ClN}_2\text{O}$   $[\text{M}+\text{H}]^+$  requires 309.0795, found 309.0783

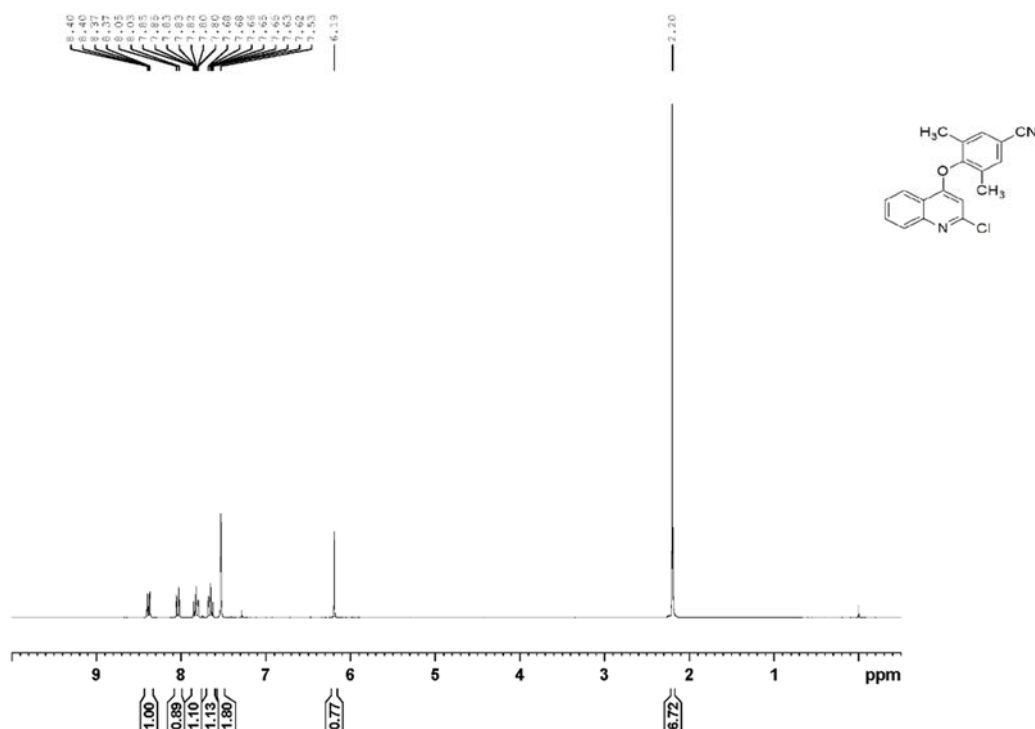

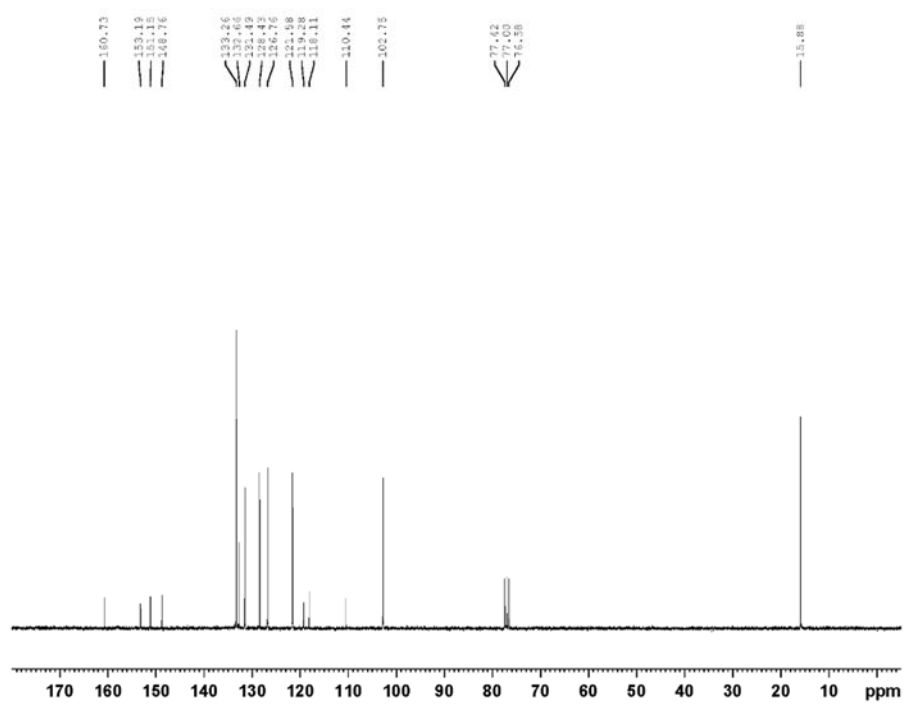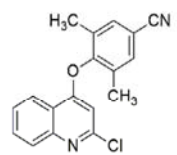

### 2-(4'-formylphenoxy)-4-chloroquinoline (3a)

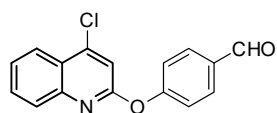

Analysis:

Mp. 121.7-122.5 °C

$^1\text{H-NMR}$  (300 MHz,  $\text{CDCl}_3$ ): 7.26 (s, 1H, ArH-3), 7.41 (dd, 2H,  $J = 8.6, 1.8$  Hz, ArH-2', 6'), 7.53 (td, 1H,  $J = 7.6, 1.2$  Hz, ArH-6), 7.68 (td, 1H,  $J = 7.7, 1.4$  Hz, ArH-7), 7.79 (dd, 1H,  $J = 8.4, 0.5$  Hz, ArH-8), 7.95 (dt, 2H,  $J = 8.6, 2.4$  Hz, ArH-3', 5'), 8.16 (dd, 1H,  $J = 8.3, 1.0$  Hz, ArH-5), and 10.0 (s, 1H, CHO)

$^{13}\text{C-NMR}$  (75 MHz,  $\text{CDCl}_3$ ): 112.9, 121.6, 124.0, 124.2, 126.1, 128.2, 131.0, 131.4, 133.1, 145.2, 146.4, 158.5, 159.9 and 190.9

HRMS (+ESI):  $\text{C}_{16}\text{H}_{11}\text{ClNO}_2$   $[\text{M}+\text{H}]^+$  requires 284.0478, found 284.0468

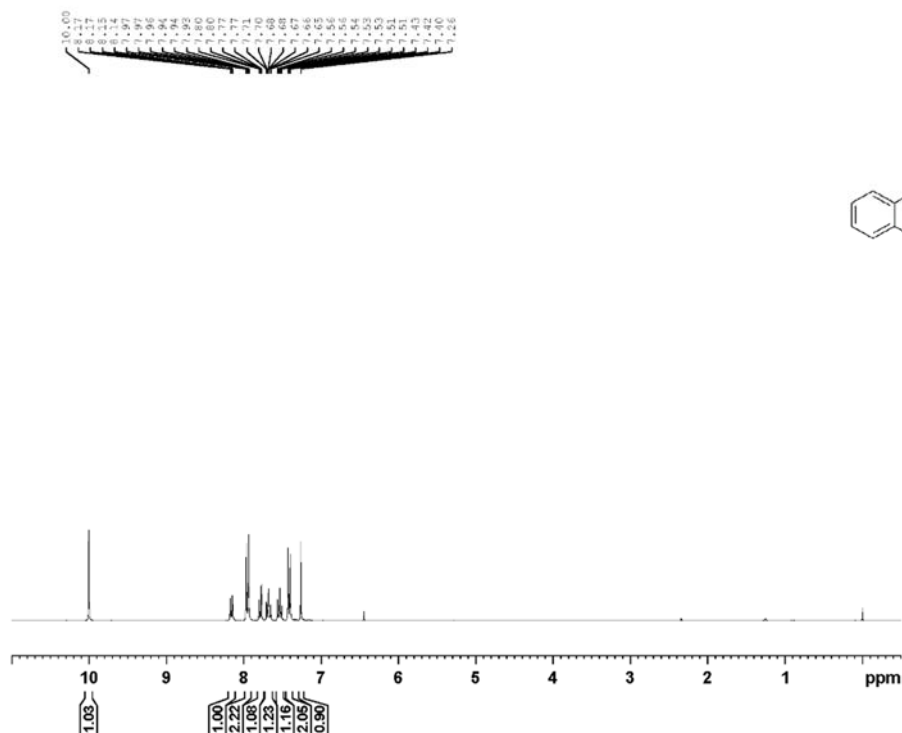

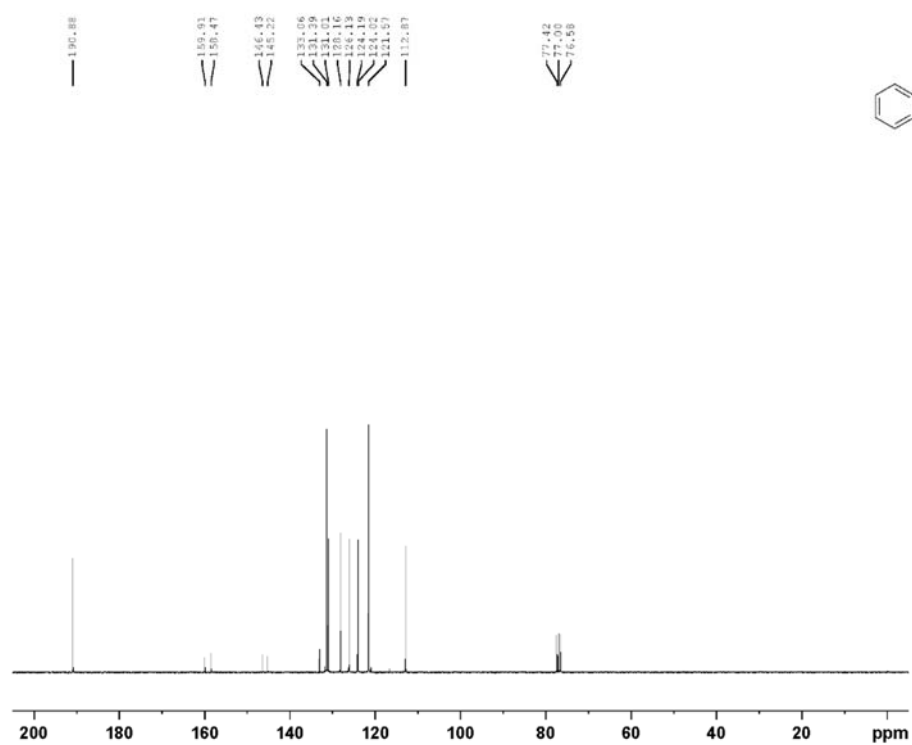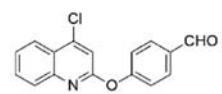

### 2-(2',6'-Dimethyl-4'-formylphenoxy)-4-chloroquinoline (3b)

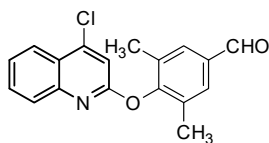

Analysis:

Mp. 113.7-114.2 °C

$^1\text{H-NMR}$  (300 MHz,  $\text{CDCl}_3$ ): 2.21 (s, 6H,  $\text{ArCH}_3$ -2', 6'), 7.27 (d, 1H,  $J = 5.8$  Hz,  $\text{ArH-3}$ ), 7.50 (td, 1H,  $J = 7.4, 1.7$  Hz,  $\text{ArH-6}$ ), 7.60-7.70 (m, 4H,  $\text{ArH-7, 8, 3', 5'}$ ), 8.15 (dd, 1H,  $J = 8.5, 0.8$  Hz,  $\text{ArH-5}$ ), and 9.99 (s, 1H, CHO)

$^{13}\text{C-NMR}$  (75 MHz,  $\text{CDCl}_3$ ): 16.7, 111.5, 123.8, 124.0, 125.6, 128.2, 130.3, 130.9, 132.5, 133.7, 145.2, 146.9, 155.3, 159.7 and 191.7

HRMS (+ESI):  $\text{C}_{18}\text{H}_{15}\text{ClNO}_2$   $[\text{M}+\text{H}]^+$  requires 312.0791, found 312.0777

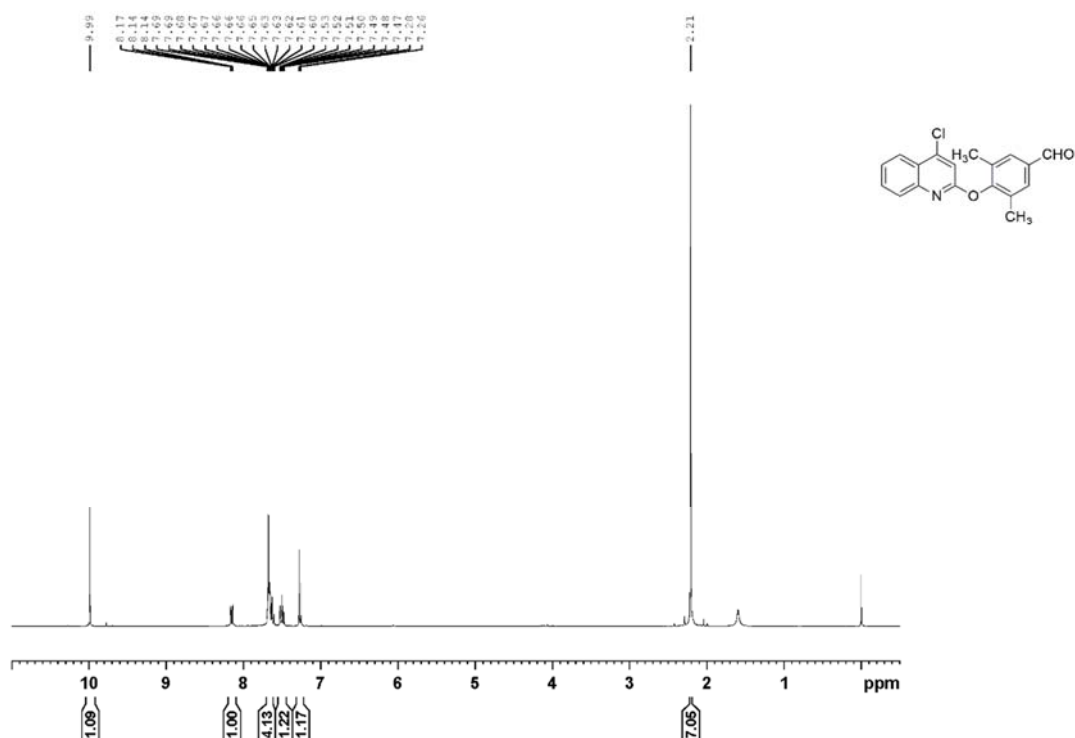

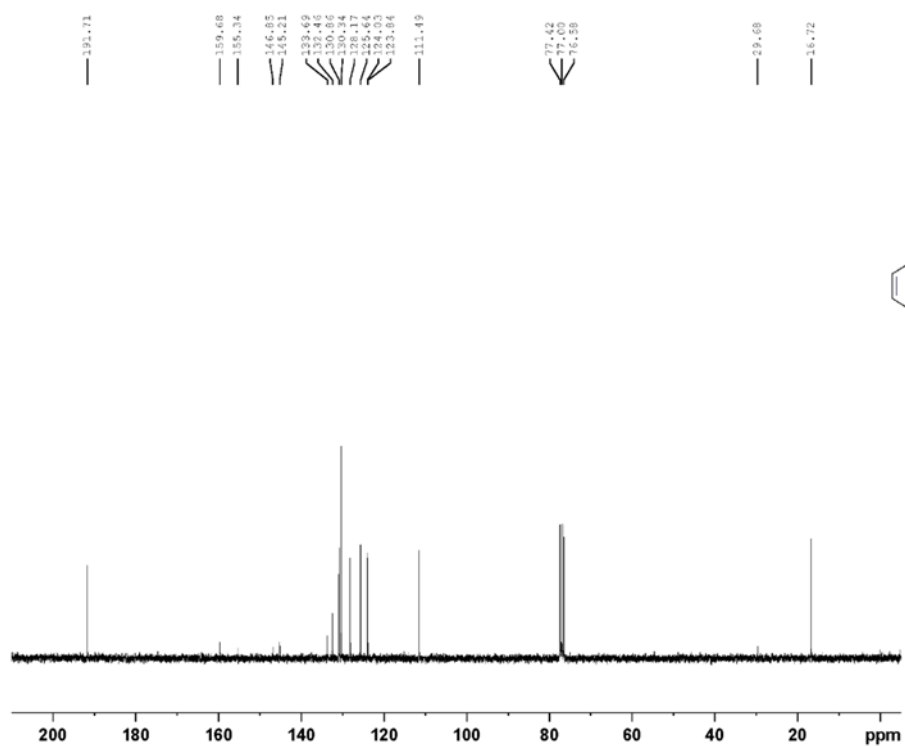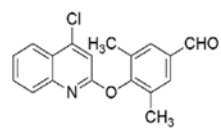

### 2-(4'-cyanophenoxy)-4-chloroquinoline (3c)

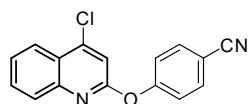

Analysis:

Mp. 147.0-148 °C

$^1\text{H-NMR}$  (300 MHz,  $\text{CDCl}_3$ ): 7.27 (d, 1H,  $J = 5.7$  Hz, ArH-3), 7.39 (dt, 2H,  $J = 8.4, 0.8$  Hz, ArH-2', 6'), 7.56 (td, 1H,  $J = 7.3, 1.3$  Hz, ArH-6), 7.65-7.82 (m, 4H, ArH-7, 8, 3', 5'), and 8.18 (dd, 1H,  $J = 8.1, 0.9$  Hz, ArH-5)

$^{13}\text{C-NMR}$  (75 MHz,  $\text{CDCl}_3$ ): 108.4, 112.8, 118.6, 122.1, 124.1, 124.3, 126.3, 128.2, 131.1, 133.8, 145.4, 146.4, 156.9 and 159.7

HRMS (+ESI):  $\text{C}_{18}\text{H}_{15}\text{ClNO}_2$   $[\text{M}+\text{H}]^+$  requires 281.0482, found 281.0475

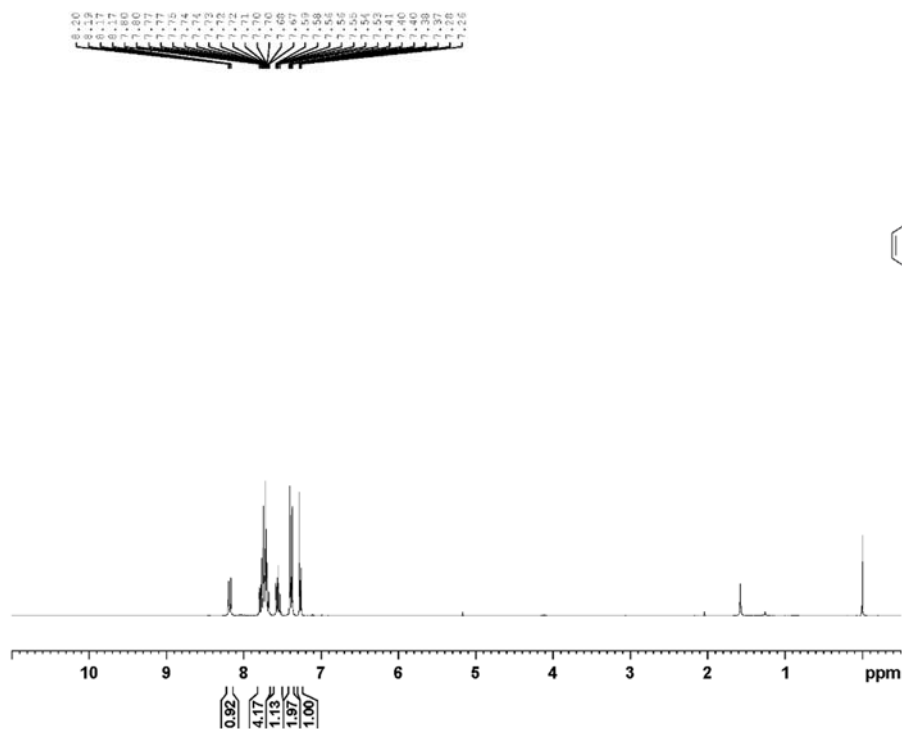

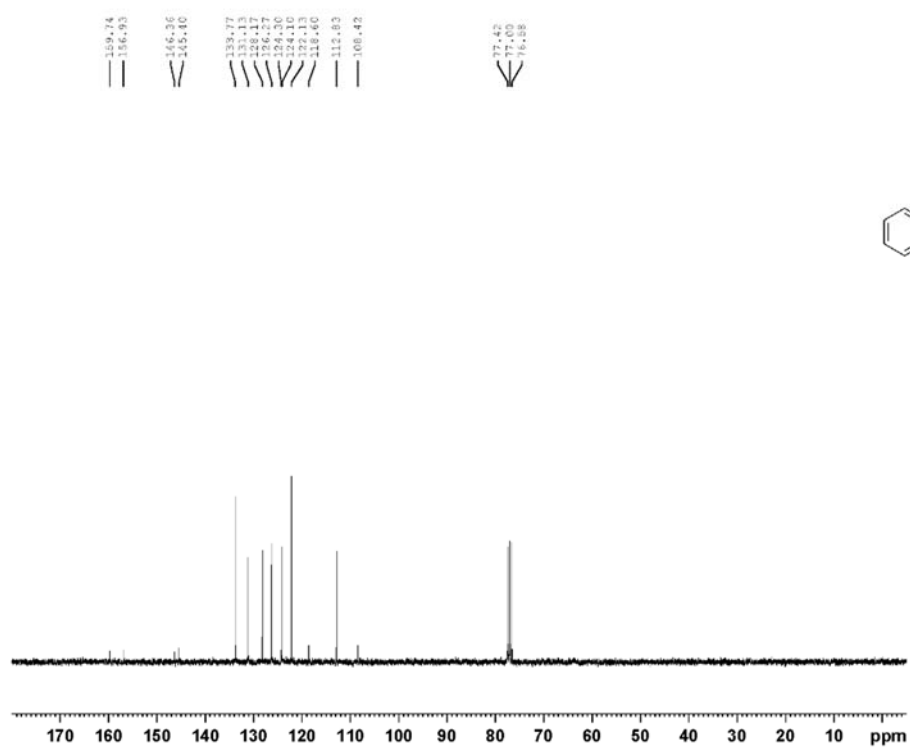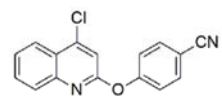

**2-(2',6'-Dimethyl-4'-cyanophenoxy)-4-chloroquinoline (3d)**

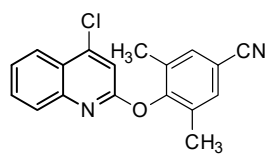

Analysis:

Mp. 152.2-153.0 °C

$^1\text{H-NMR}$  (300 MHz,  $\text{CDCl}_3$ ): 2.16 (s, 6H,  $\text{ArCH}_3$ -2', 6'), 7.29 (s, 1H,  $\text{ArH}$ -3), 7.44 (s, 2H,  $\text{ArH}$ -3', 5'), 7.51 (td, 1H,  $J = 7.3, 2.2$  Hz,  $\text{ArH}$ -6), 7.60-7.69 (m, 2H,  $\text{ArH}$ -7, 8) and 8.16 (d, 1H,  $J = 8.2$  Hz,  $\text{ArH}$ -5)

$^{13}\text{C-NMR}$  (75 MHz,  $\text{CDCl}_3$ ): 16.6, 109.1, 111.5, 118.9, 123.9, 124.0, 125.7, 128.1, 130.9, 132.5, 133.0, 145.3, 146.7, 153.9 and 159.4

HRMS (+ESI):  $\text{C}_{18}\text{H}_{14}\text{ClN}_2\text{O}$   $[\text{M}+\text{H}]^+$  requires 309.0795, found 309.0787

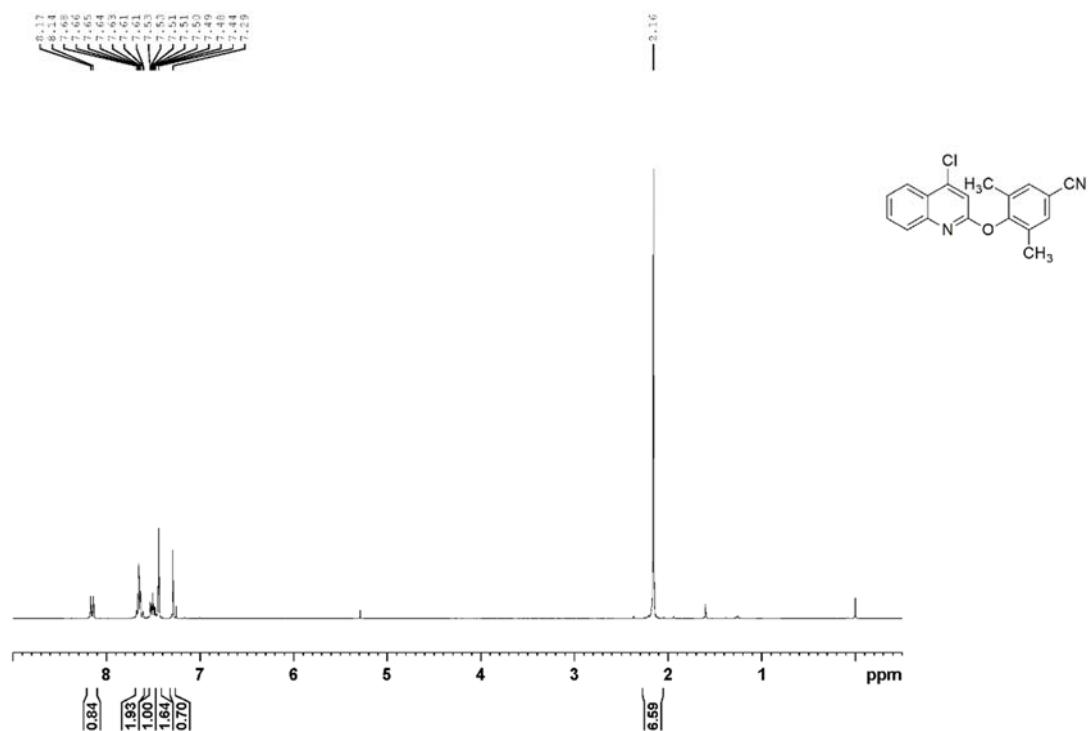

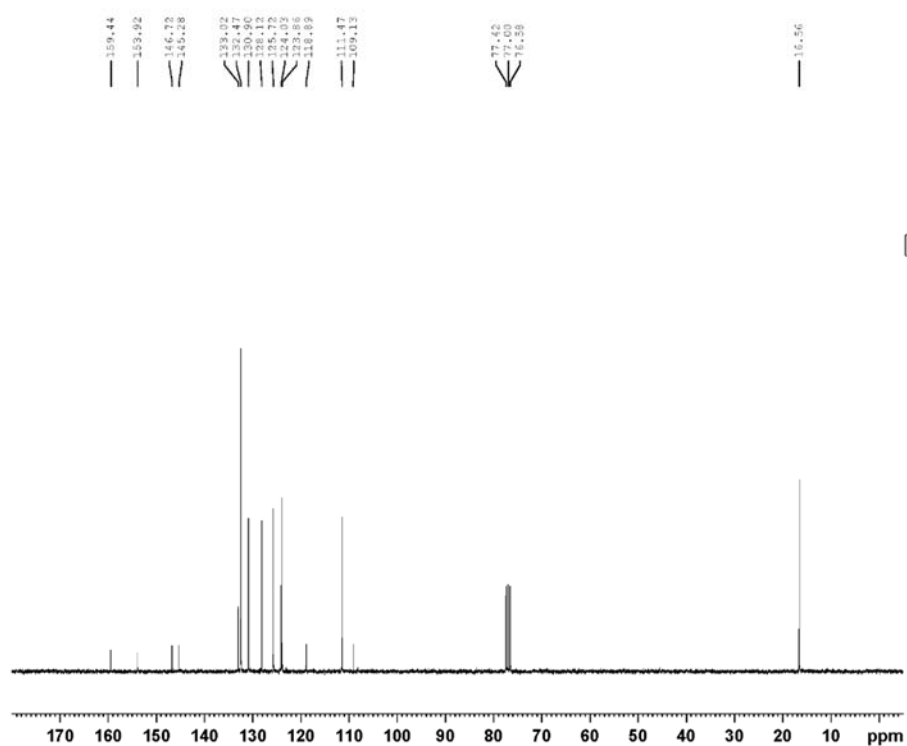

159.44  
153.92  
146.72  
145.28  
139.02  
138.92  
130.90  
130.42  
128.42  
125.72  
124.92  
123.86  
118.89  
111.47  
109.13

77.42  
77.06  
16.59

16.56

## 2,4-di-(4'-formylphenoxy)-quinoline (4a)

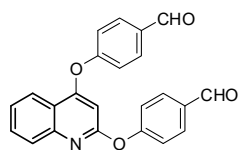

Analysis:

mp: 164.9-165.5 °C

$^1\text{H-NMR}$  (300 MHz,  $\text{CDCl}_3$ ): 6.43 (s, 1H, ArH-3), 7.36-7.43 (m, 4H, ArH-2', 6', 2'', 6''), 7.51 (td, 1H,  $J = 7.6, 1.3$  Hz, ArH-6), 7.71 (td, 1H,  $J = 8.1, 1.5$  Hz, ArH-7), 7.80 (dd, 1H,  $J = 8.4, 0.5$  Hz, ArH-8), 7.94 (ddd, 2H,  $J = 8.7, 2.0$  Hz, ArH-3', 5'), 8.03 (ddd, 2H,  $J = 8.7, 2.0$  Hz, ArH-3'', 5''), 8.22 (dd, 1H,  $J = 8.3, 0.9$  Hz, ArH-5), 10.00 (s, 1H, CHO) and 10.04 (s, 1H, CHO)

$^{13}\text{C-NMR}$  (75 MHz,  $\text{CDCl}_3$ ): 97.2, 119.7, 120.9, 121.5, 121.7, 125.3, 127.9, 131.1, 131.4, 132.2, 132.9, 133.7, 147.3, 158.7, 159.5, 161.3, 163.2, 190.5 and 191.0

HRMS (+ESI):  $\text{C}_{23}\text{H}_{16}\text{NO}_4$   $[\text{M}+\text{H}]^+$  requires 370.1079, found 370.1088.

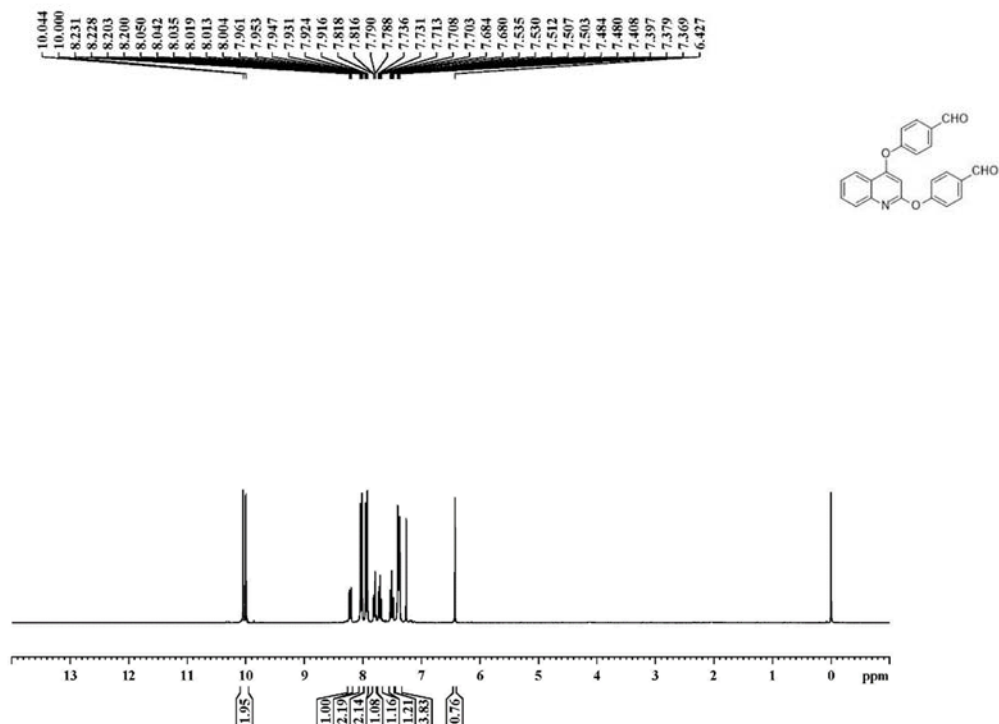

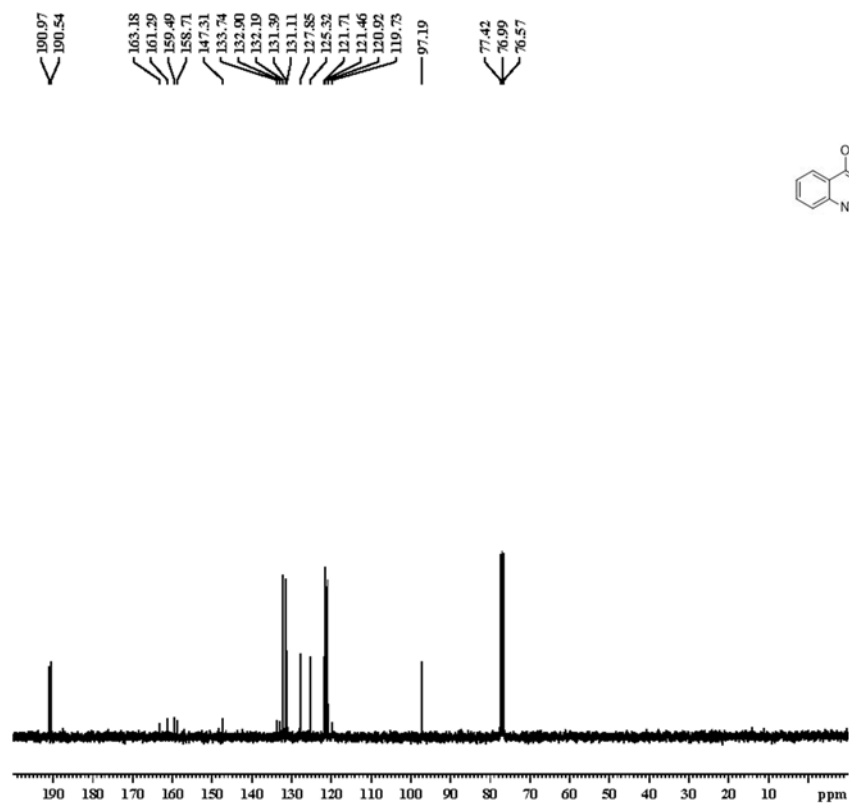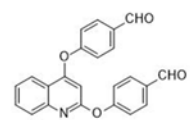

## 2,4-di-(2',6'-Dimethyl-4'-formylphenoxy)-quinoline (4b)

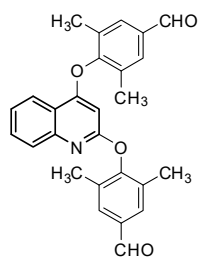

Analysis:

mp. 120.5-121.0 °C

$^1\text{H-NMR}$  (300 MHz,  $\text{CDCl}_3$ ): 2.16 (s, 6H,  $\text{ArCH}_3$ -2', 6'), 2.29 (s, 6H,  $\text{ArCH}_3$ -2'', 6''), 5.99 (s, 1H,  $\text{ArH}$ -3), 7.46-7.51 (m, 1H,  $\text{ArH}$ -6), 7.63-7.66 (m, 4H,  $\text{ArH}$ -3', 5', 7, 8), 7.76 (s, 2H,  $\text{ArH}$ -3'', 5''), 8.35 (d, 1H,  $J = 8.1$  Hz,  $\text{ArH}$ -5), 9.95 (s, 1H, CHO) and 10.02 (s, 1H, CHO)

$^{13}\text{C-NMR}$  (75 MHz,  $\text{CDCl}_3$ ): 16.1, 16.7, 91.7, 118.5, 121.6, 124.5, 127.7, 130.2, 130.7, 130.9, 132.2, 132.4, 133.4, 134.2, 147.5, 155.0, 155.6, 161.3, 162.1, 191.3 and 191.7

HRMS (+ESI):  $\text{C}_{27}\text{H}_{24}\text{NO}_4$   $[\text{M}+\text{H}]^+$  requires 426.1700, found 426.1690.

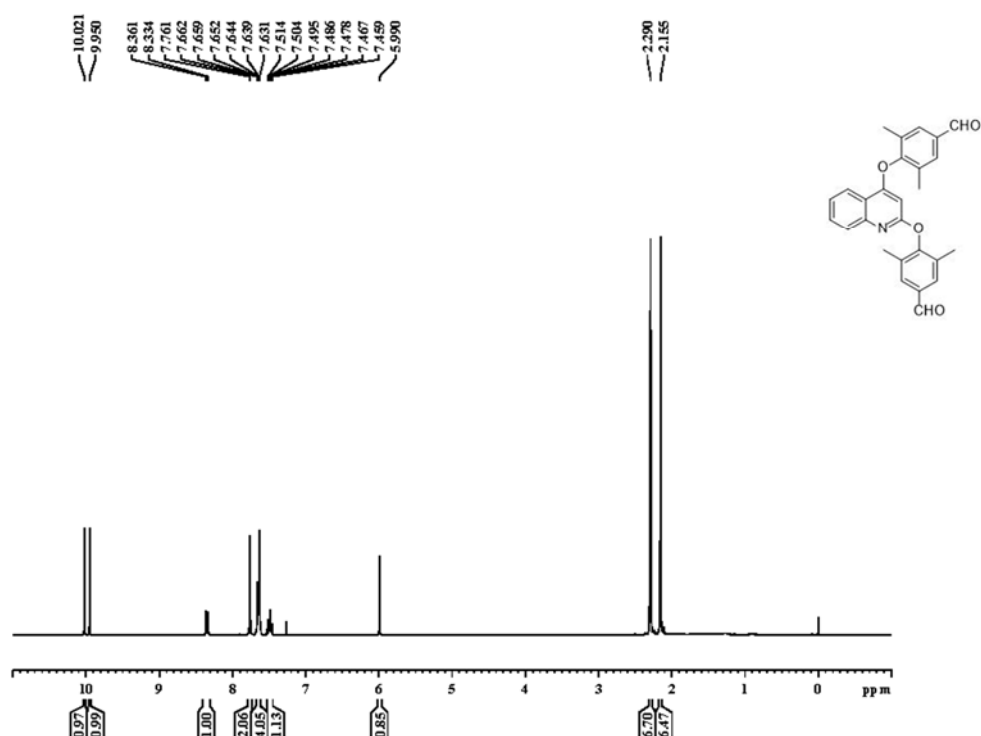

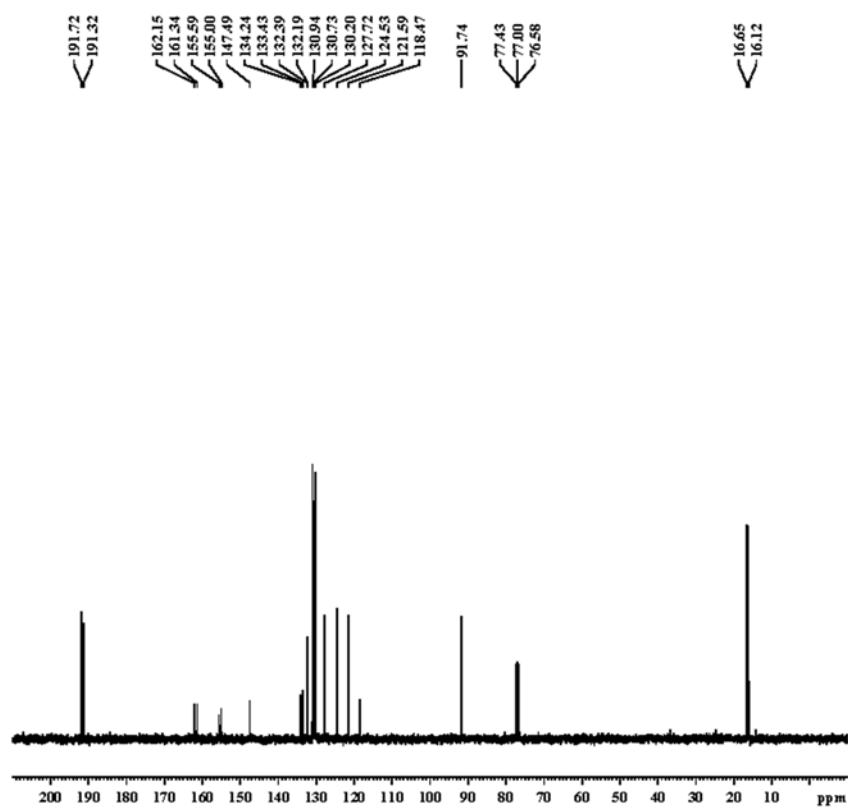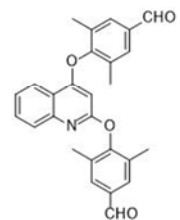

## 2,4-di-(4'-cyanophenoxy)-quinoline (4c)

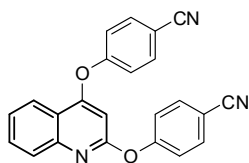

Analysis:

Mp. 220.9-221.5 °C

$^1\text{H-NMR}$  (300 MHz,  $\text{CDCl}_3$ ): 6.40 (s, 1H, ArH-3), 7.30-7.40 (m, 4H, ArH-2', 6', 2'', 6''), 7.51 (td, 1H,  $J = 7.5, 1.3$  Hz, ArH-6), 7.66-7.75 (m, 3H, ArH-7, 3', 5'), 7.75-7.84 (m, 3H, ArH-8, 3'', 5'') and 8.18 (dd, 1H,  $J = 8.0, 0.7$  Hz, ArH-5)

$^{13}\text{C-NMR}$  (75 MHz,  $\text{CDCl}_3$ ): 97.1, 108.2, 109.4, 118.0, 118.6, 119.6, 121.3, 121.6, 122.0, 125.5, 127.8, 131.3, 133.7, 134.7, 147.2, 157.0, 158.1, 161.0 and 163.0

HRMS (+ESI):  $\text{C}_{23}\text{H}_{14}\text{N}_3\text{O}_2$   $[\text{M}+\text{H}]^+$  requires 364.1086, found 364.1067

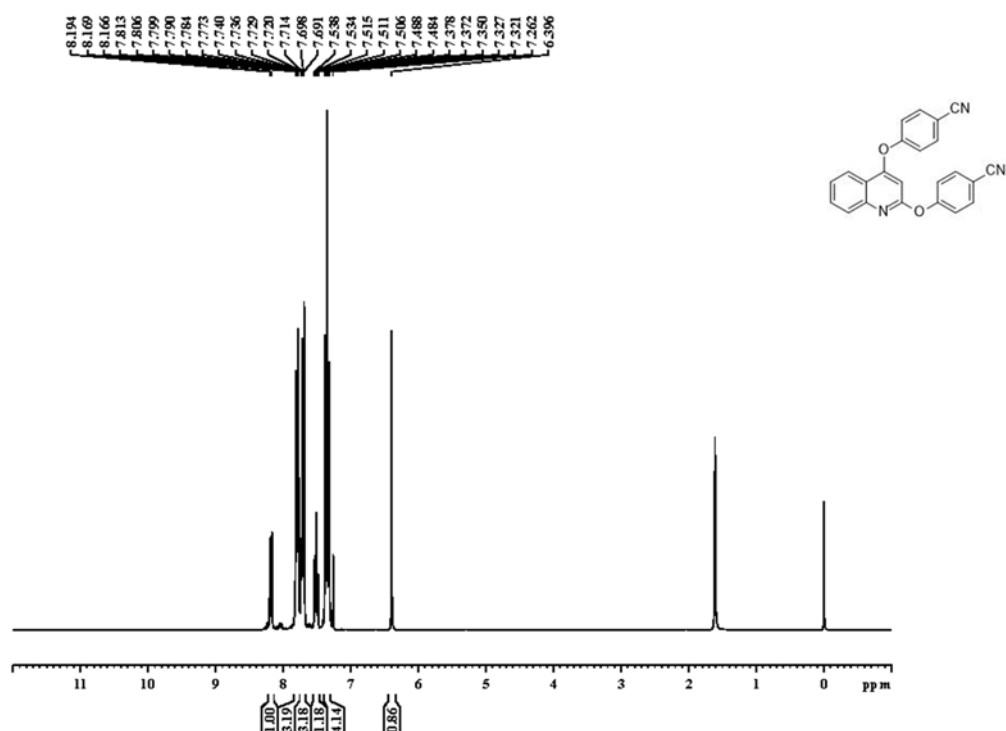

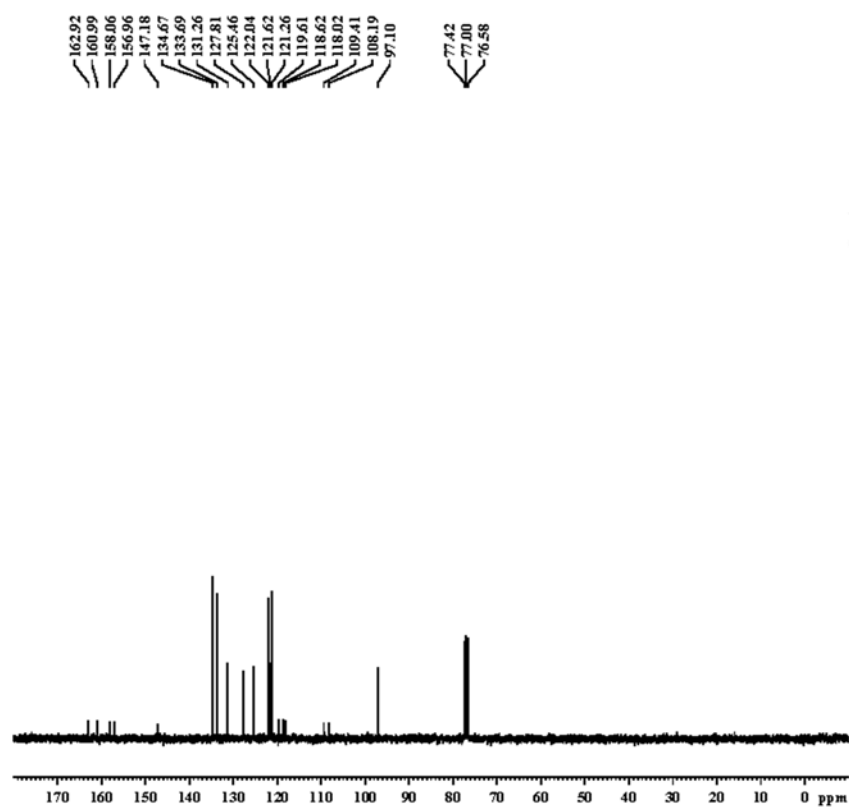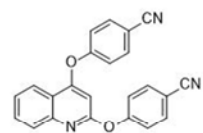

## 2,4-di-(2',6'-Dimethyl-4'-cyanophenoxy)-quinoline (4d)

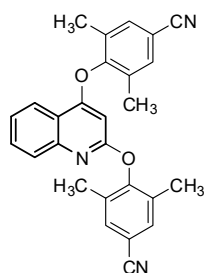

Analysis:

mp: 201.8-202.4 °C

<sup>1</sup>H-NMR (300 MHz, CDCl<sub>3</sub>): 2.10 (s, 6H, ArCH<sub>3</sub>-2', 6'), 2.24 (s, 6H, ArCH<sub>3</sub>-2'', 6''), 5.96 (s, 1H, ArH-3), 7.41 (s, 2H, ArH-3', 5'), 7.46-7.52 (m, 1H, ArH-6), 7.54 (bs, 2H, ArH-3'', 5''), 7.64-7.66 (m, 2H, ArH-7, 8) and 8.32 (d, 1H, J = 8.3 Hz, ArH-5)

<sup>13</sup>C-NMR (75 MHz, CDCl<sub>3</sub>): 16.0, 16.5, 91.6, 102.8, 108.9, 110.2, 118.3, 118.4, 119.0, 121.5, 121.6, 124.7, 126.8, 127.8, 128.5, 130.9, 131.6, 132.4, 132.8, 133.0, 133.3, 147.4, 153.7, 154.1, 161.0 and 162.0

HRMS (+ESI): C<sub>27</sub>H<sub>22</sub>N<sub>3</sub>O<sub>2</sub> [M+H]<sup>+</sup> requires 420.1706, found 420.1712.

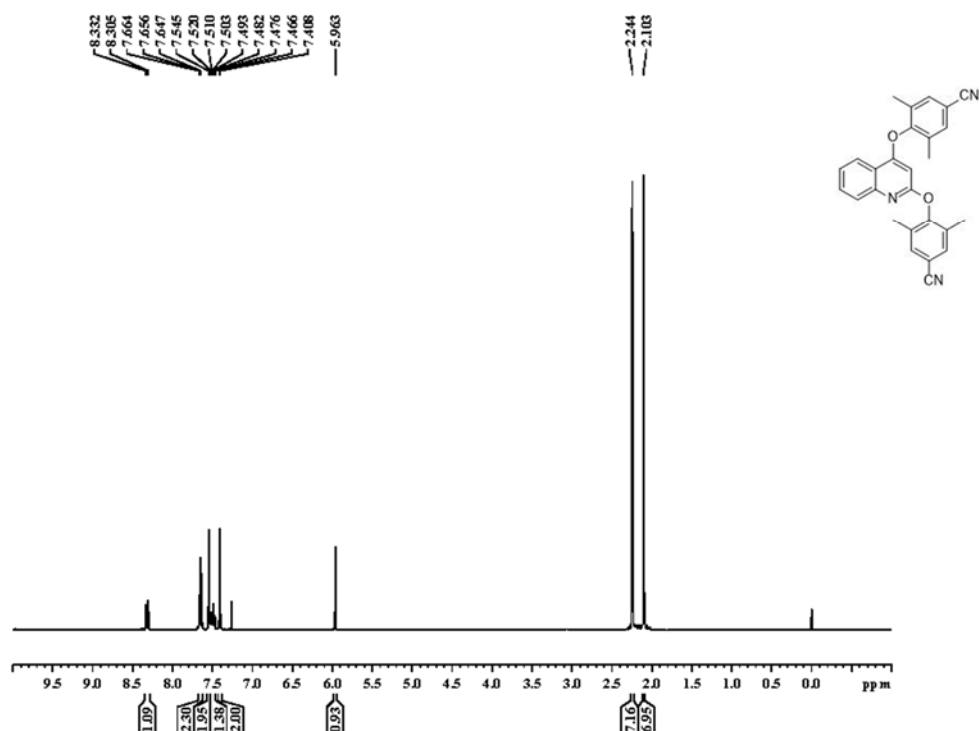

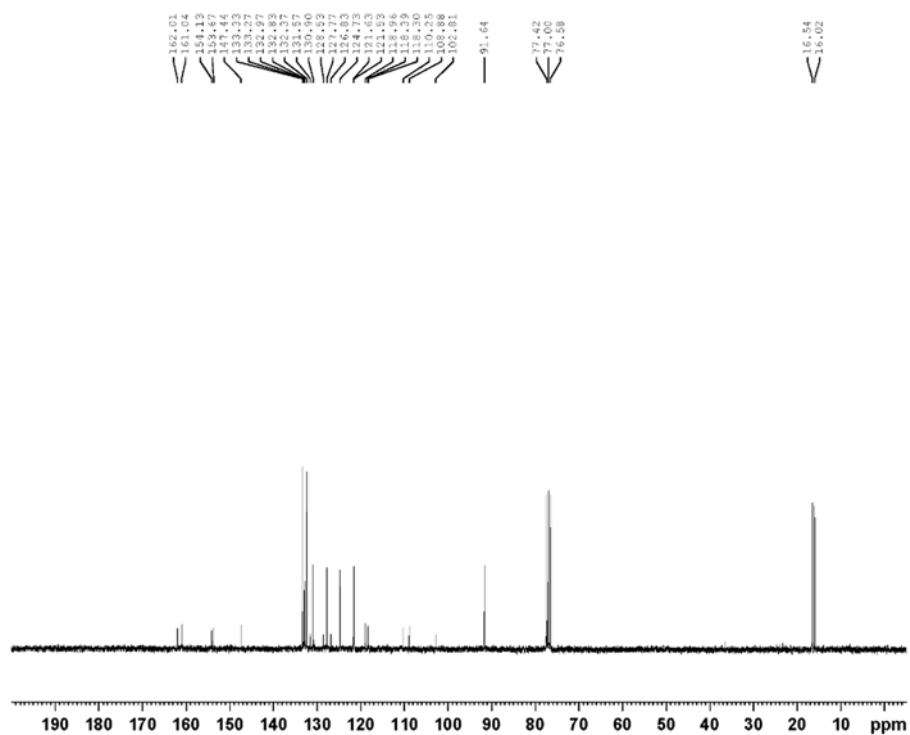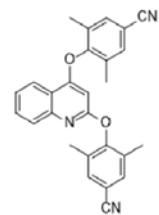

## Scheme 2

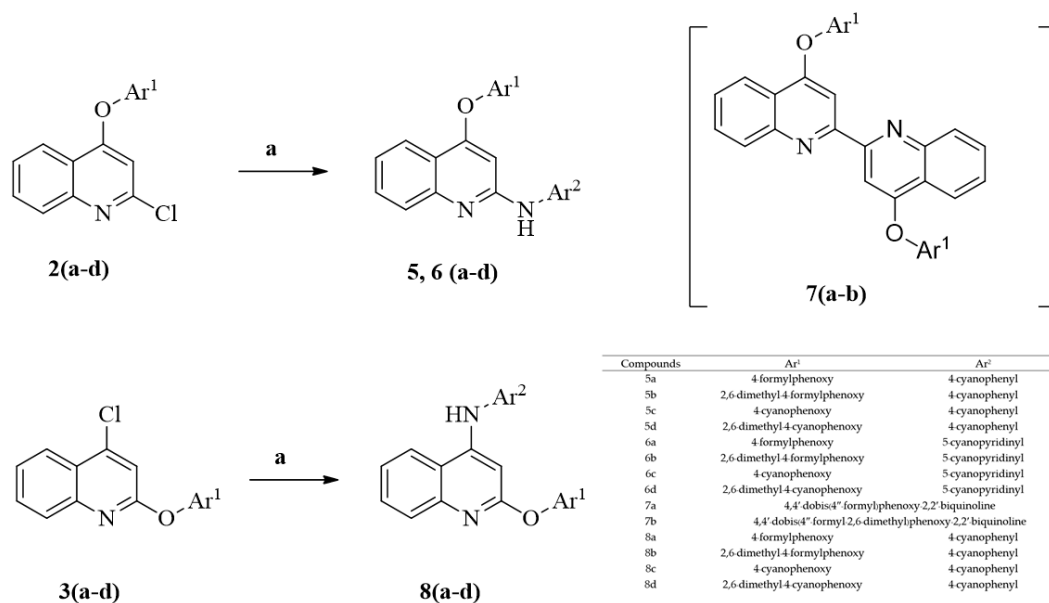

Synthesis of 2-phenylamino-4-phenoxy-quinoline (**5a–5d** and **6a–6d**), biquinolines (**7a** and **7b**), 2-phenoxy-4-phenylamine-quinoline (**8a–8d**). Reagents and conditions: a. 4-aminobenzonitrile (Ar<sup>2</sup>-NH<sub>2</sub>, 1.3 eq.) for **5a–5d** and **8a–8d** or 2-amino-5-cyanopyridine (Ar<sup>2</sup>-NH<sub>2</sub>) for **6a–6d**, Cs<sub>2</sub>CO<sub>3</sub> (1.5 eq), Pd(OAc)<sub>2</sub> (5 mol.%), SPhos (5 mol.%), DMF, 120 °C, sealed tube.

**4-(4'-formylphenoxy)-2-(4''-cyanophenyl)-aminoquinoline (5a)**

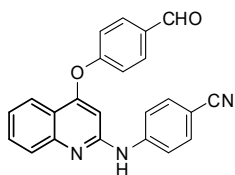

Analysis:

Mp. 267.1-268.0 °C

$^1\text{H-NMR}$  (300 MHz, DMSO- $d_6$ ): 6.42 (s, 1H, ArH-3), 7.43 (t, 1H,  $J = 7.1$  Hz, ArH-6), 7.50-7.59 (m, 2H, ArH-2'', 6''), 7.66-7.88 (m, 4H, ArH-3'', 5'', 2', 6'), 8.04-8.15 (m, 5H, ArH-5, 7, 8, 3', 5'), 9.80 (bs, 1H, NH), and 10.10 (s, 1H, CHO)

$^{13}\text{C-NMR}$  (75 MHz, DMSO- $d_6$ ): 97.8, 102.0, 117.6, 117.9, 119.6, 121.2, 123.6, 126.7, 130.7, 132.1, 133.1, 133.5, 145.4, 148.1, 154.1, 159.1, 160.4 and 191.9

HRMS (+ESI):  $\text{C}_{23}\text{H}_{16}\text{N}_3\text{O}_2$   $[\text{M}+\text{H}]^+$  requires 366.1237, found 366.1229

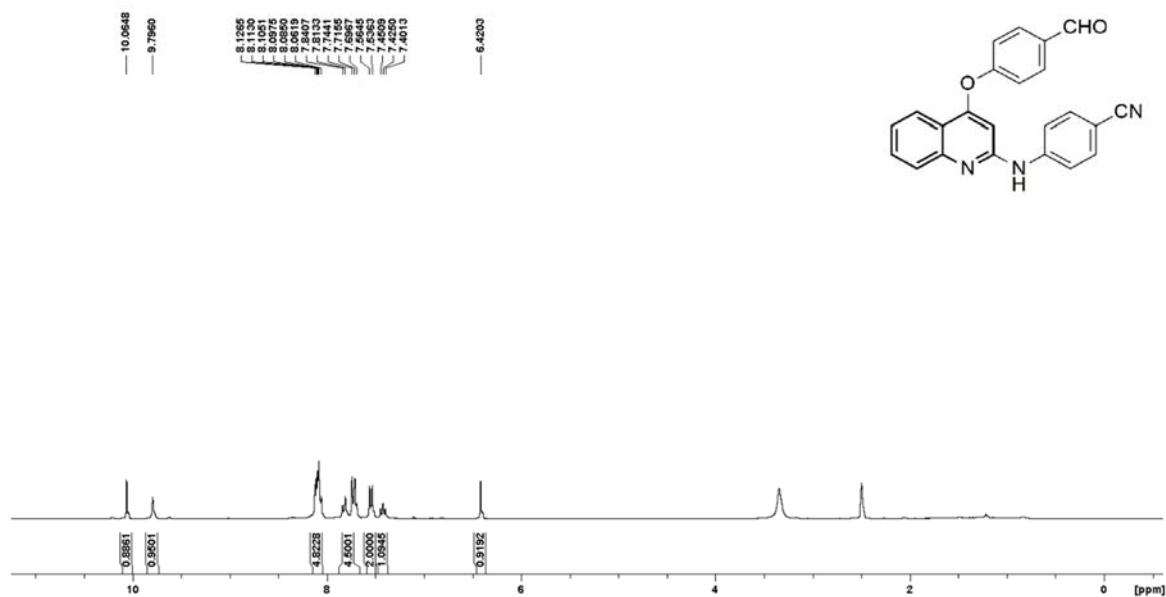

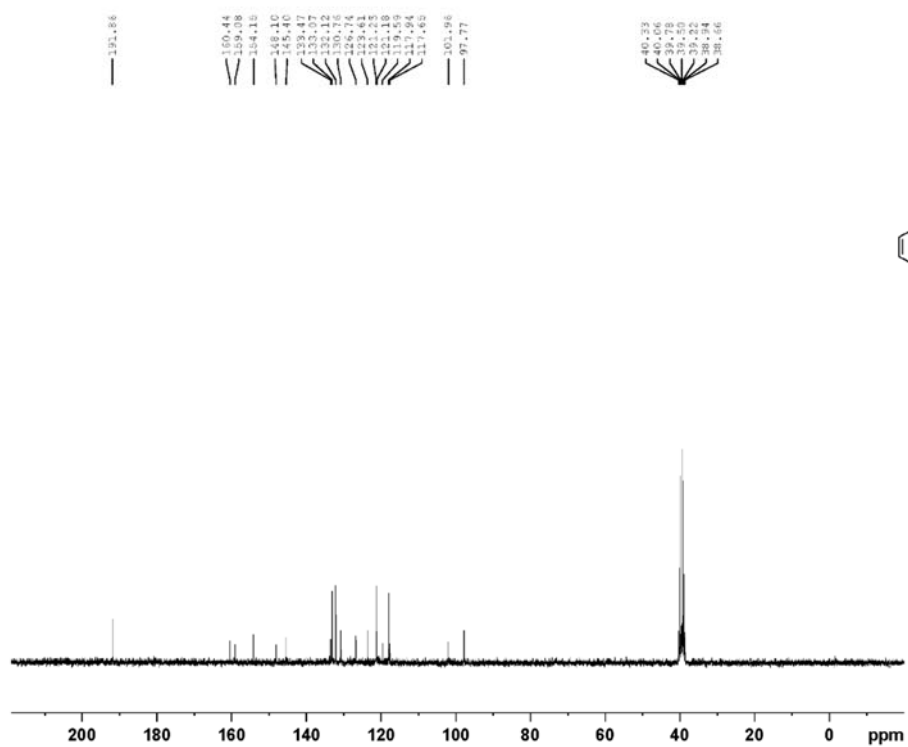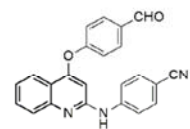

**4-(2',6'-Dimethyl-4'-formylphenoxy)-2-(4''-cyanophenyl)-aminoquinoline (5b)**

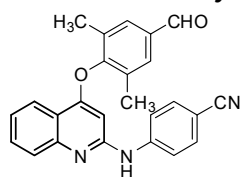

Analysis:

Mp. 291.3-292.2 °C

$^1\text{H-NMR}$  (300 MHz,  $\text{CDCl}_3$ ): 2.26 (s, 6H,  $\text{ArCH}_3$ -2', 6'), 5.73 (s, 1H,  $\text{ArH}$ -3), 6.95 (bs, 1H, NH), 7.46 (td, 1H,  $J = 7.6, 1.0$  Hz,  $\text{ArH}$ -6), 7.56 (m, 2H,  $\text{ArH}$ -2'', 6''), 7.70 (s, 2H,  $\text{ArH}$ -3', 5'), 7.74 (m, 1H,  $\text{ArH}$ -7), 7.87 (m, 2H,  $\text{ArH}$ -3'', 5''), 7.91 (d, 1H,  $J = 8.6$  Hz,  $\text{ArH}$ -8), 8.30 (dd, 1H,  $J = 8.2, 1.1$  Hz,  $\text{ArH}$ -5), and 9.96 (s, 1H, CHO)

$^{13}\text{C-NMR}$  (75 MHz,  $\text{CDCl}_3$ ): 16.1, 93.1, 104.0, 117.6, 118.2, 119.5, 121.5, 123.9, 127.3, 130.9, 132.5, 133.2, 134.1, 144.6, 148.7, 153.5, 155.2, 160.7, and 191.4

HRMS (+ESI):  $\text{C}_{25}\text{H}_{20}\text{N}_3\text{O}_2$   $[\text{M}+\text{H}]^+$  requires 394.1550, found 394.1559

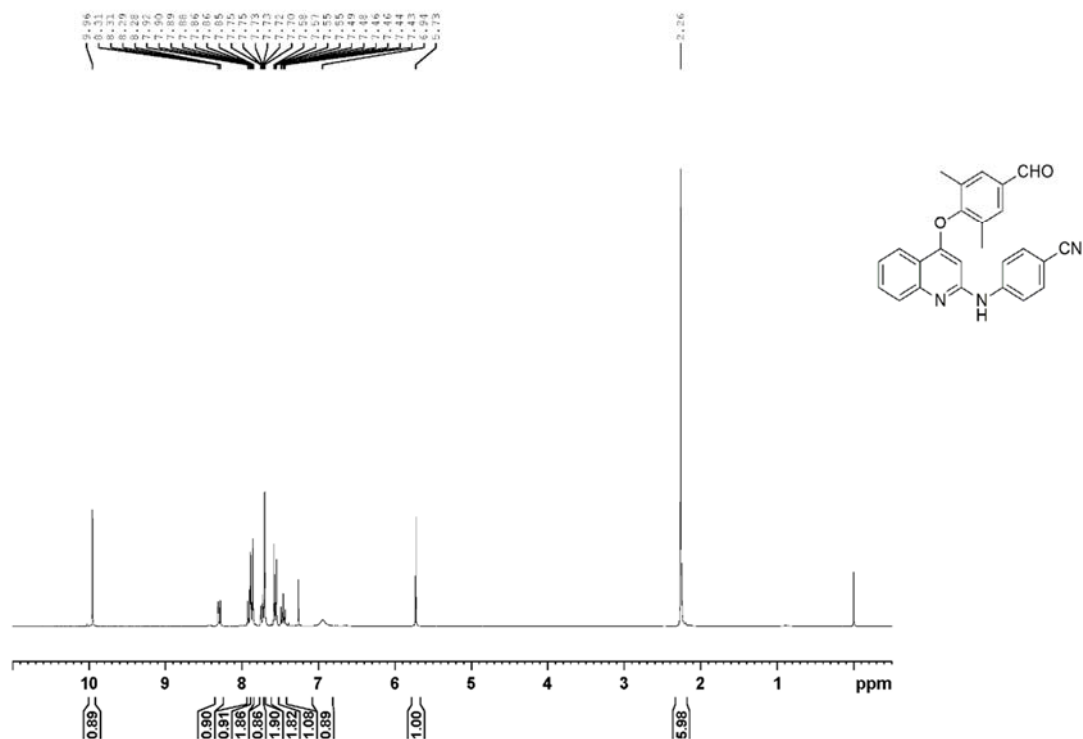

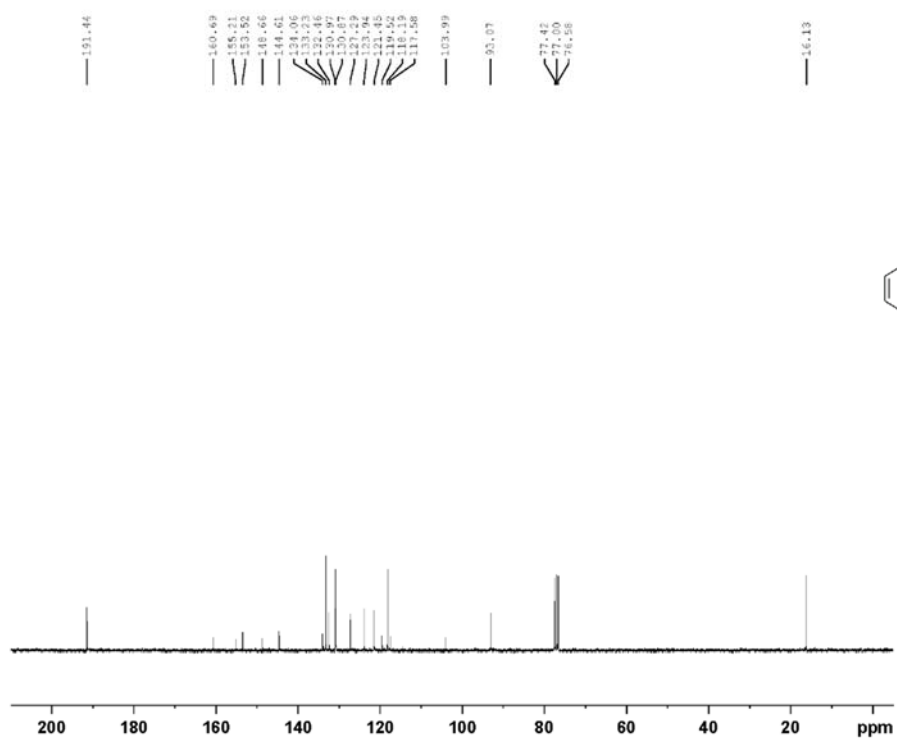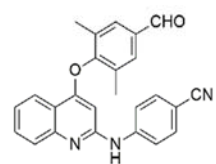

**4-(4'-cyanophenoxy)-2-(4''-cyanophenyl)-aminoquinoline (5c)**

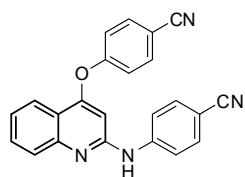

Analysis:

Mp. 278.5-278.7 °C

$^1\text{H-NMR}$  (300 MHz,  $\text{CDCl}_3$ ): 6.59 (s, 1H, ArH-3), 7.17-7.31 (m, 4H, ArH-2'', 6'', 2', 6'), 7.47-7.54 (m, 1H, ArH-6), 7.58-7.80 (m, 7H, ArH-7, 8, 3'', 5'', 3', 5', NH) and 8.08 (d, 1H, J = 7.9 Hz, ArH-5)

$^{13}\text{C-NMR}$  (75 MHz,  $\text{CDCl}_3$ ): 103.9, 108.5, 118.1, 119.8, 119.9, 121.6, 125.9, 126.9, 128.0, 131.1, 133.2, 134.4, 147.8, 148.7, 156.0, 158.7, and 160.2

HRMS (+ESI):  $\text{C}_{23}\text{H}_{15}\text{N}_4\text{O} [\text{M}+\text{H}]^+$  requires 363.1240, found 363.1232

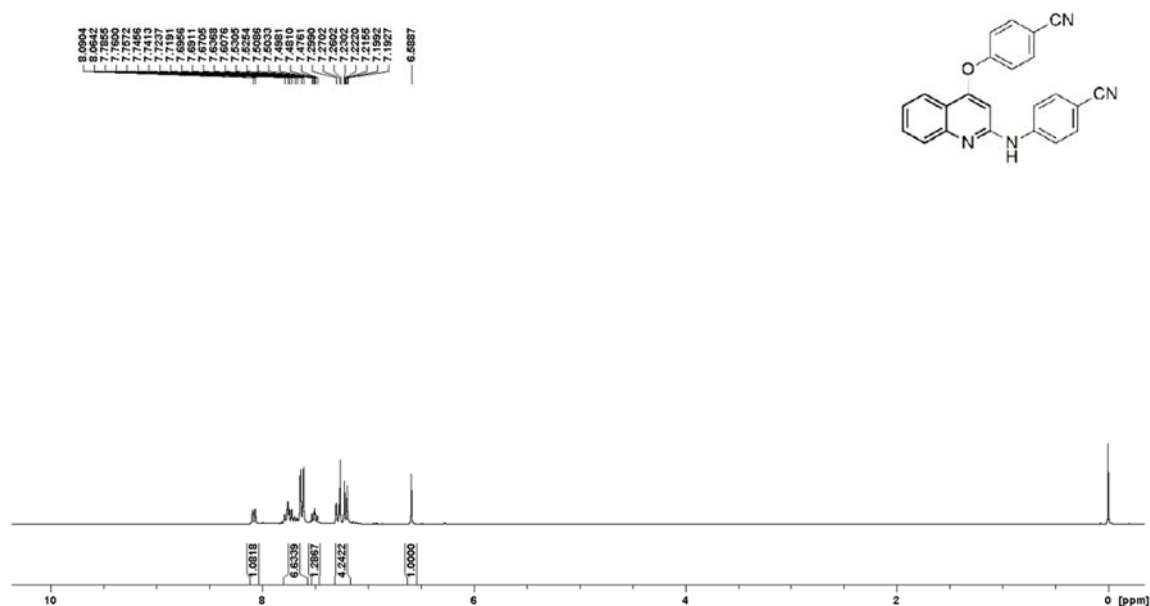

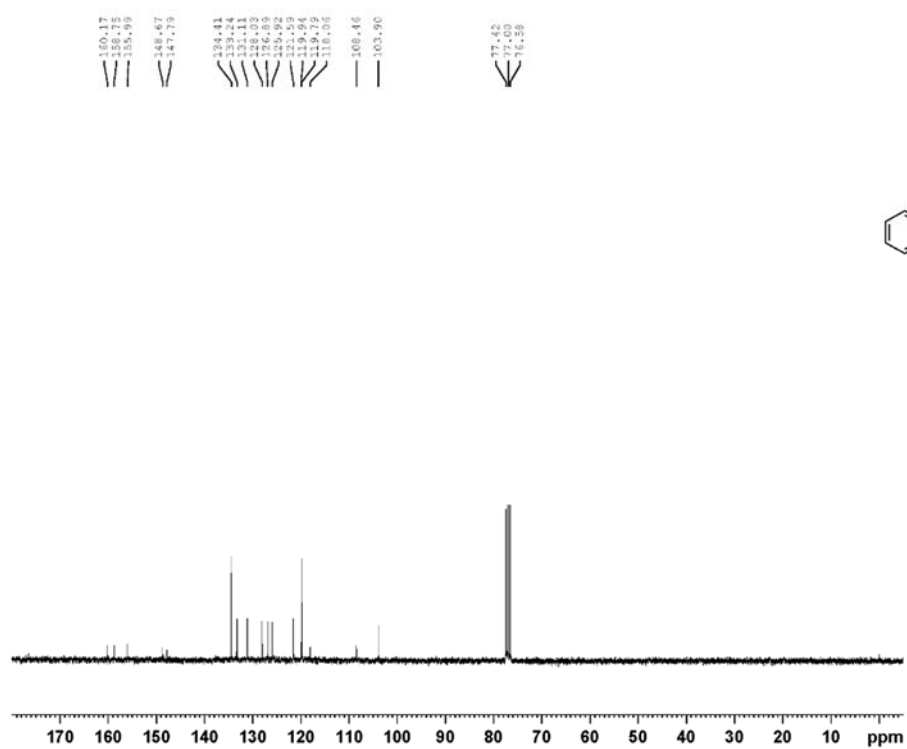

**4-(2',6'-Dimethyl-4'-cyanophenoxy)-2-(4''-cyanophenyl)-aminoquinoline (5d)**

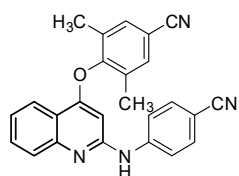

Analysis:

Mp. 256.5-257.0 °C

$^1\text{H-NMR}$  (300 MHz,  $\text{CDCl}_3$ ): 2.23 (s, 6H, ArCH<sub>3</sub>-2', 6'), 5.81 (s, 1H, ArH-3), 7.41-7.46 (m, 1H, ArH-6), 7.47 (s, 2H, ArH-3', 5'), 7.56 (dd, 2H, J = 7.1, 1.8 Hz, ArH-2'', 6''), 7.71 (m, 2H, ArH-7, NH), 7.87-7.99 (m, 3H, ArH-8, 3'', 5''), and 8.27 (dd, 1H, J = 8.2, 1.1 Hz, ArH-5)

$^{13}\text{C-NMR}$  (75 MHz,  $\text{CDCl}_3$ ): 16.0, 93.3, 103.6, 109.4, 117.4, 118.2, 119.6, 121.3, 123.8, 127.2, 130.9, 133.0, 133.1, 133.2, 144.8, 148.6, 153.8, 154.0, and 160.2

HRMS (+ESI):  $\text{C}_{25}\text{H}_{19}\text{N}_4\text{O}$   $[\text{M}+\text{H}]^+$  requires 391.1553, found 391.1548

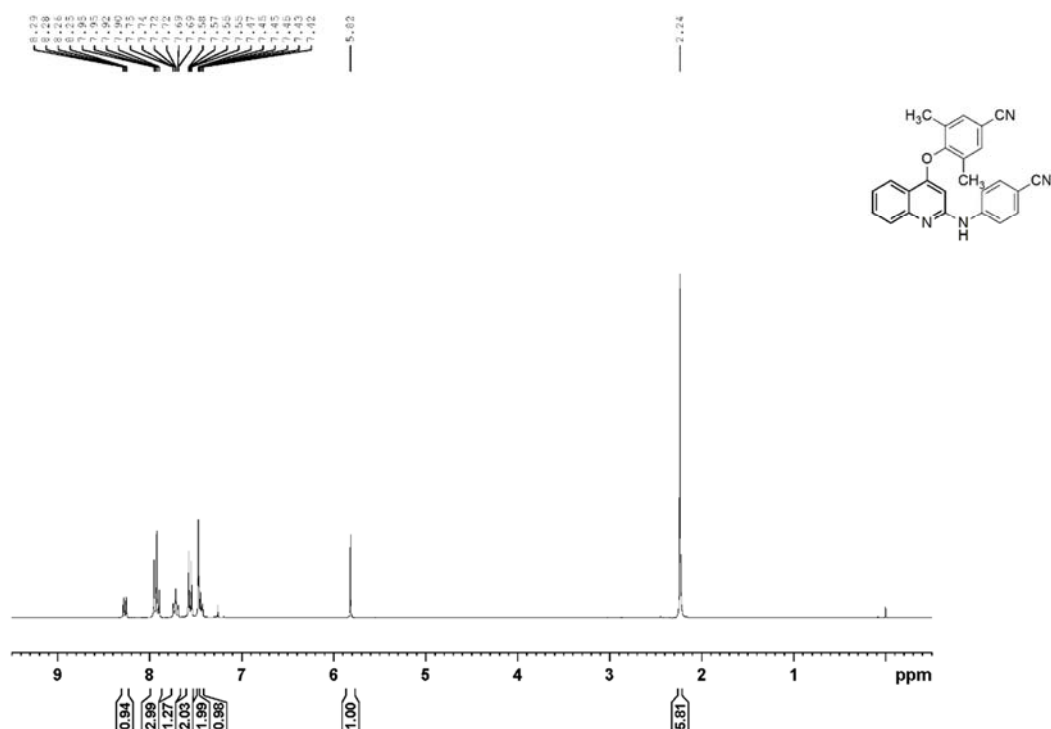

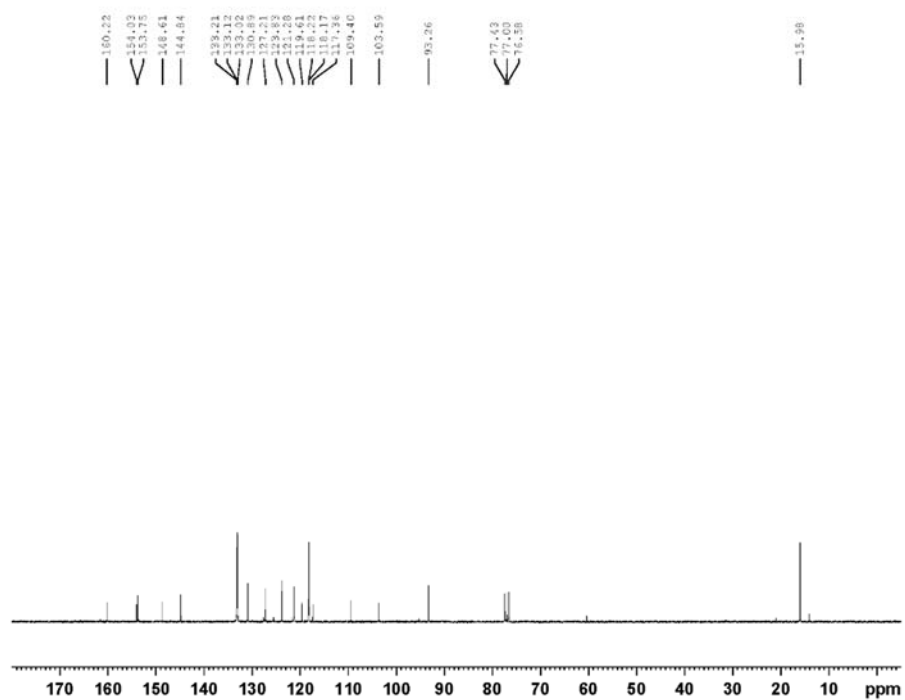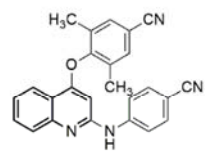

**4-(4'-formylphenoxy)-2-(5''-cyanopyridin-2''ylamino)quinoline (6a)**

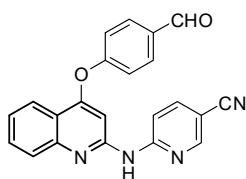

Analysis:

Mp. 248.0-249.0 °C

$^1\text{H-NMR}$  (300 MHz,  $\text{CDCl}_3$ ): 6.77 (s, 1H, ArH-3), 7.34 (d, 2H,  $J = 8.6$  Hz, ArH-2', 6'), 7.46 (td, 1H,  $J = 7.6, 0.8$  Hz, ArH-3'), 7.74 (td, 1H,  $J = 7.7, 1.4$  Hz, ArH-6), 7.83-7.95 (m, 3H, ArH-7, 8, NH), 7.97-8.06 (m, 2H, ArH-3', 5'), 8.14 (dd, 1H,  $J = 8.6, 0.8$  Hz, ArH-5), 8.33-8.49 (m, 2H, ArH-4'', 6'') and 10.0 (s, 1H, CHO)

$^{13}\text{C-NMR}$  (75 MHz,  $\text{CDCl}_3$ ): 98.6, 112.1, 117.5, 120.6, 121.7, 124.7, 127.2, 130.4, 131.3, 132.1, 133.5, 140.8, 151.8, 152.2, 161.7 and 190.5

HRMS (+ESI):  $\text{C}_{22}\text{H}_{15}\text{N}_4\text{O}_2$   $[\text{M}+\text{H}]^+$  requires 367.1190, found 367.1176

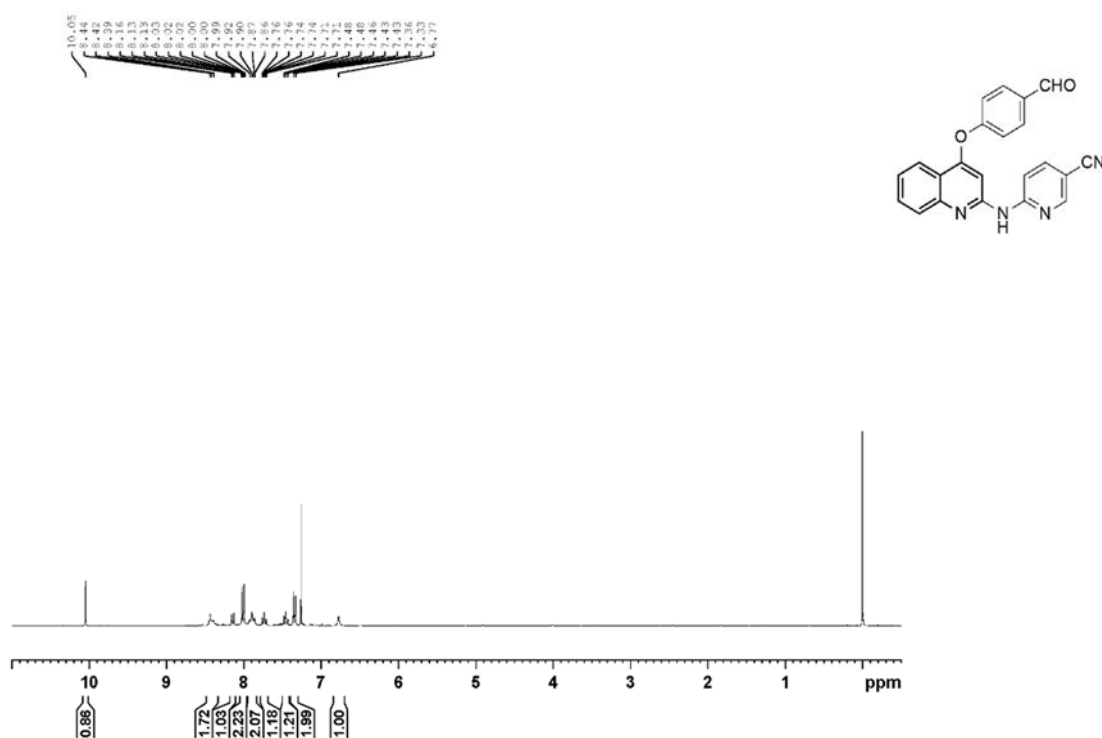

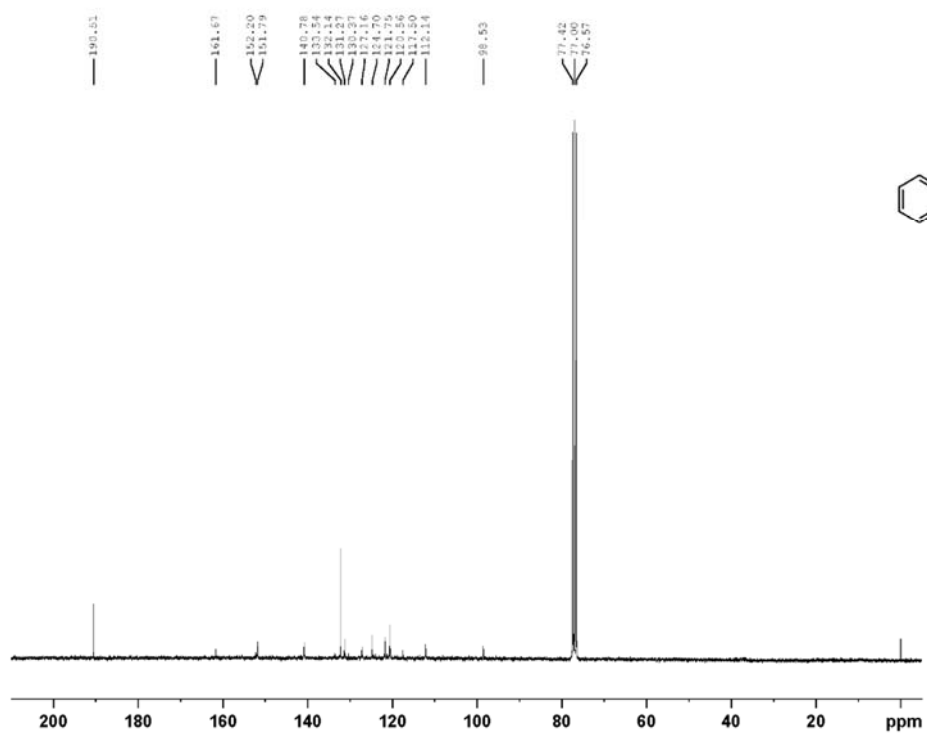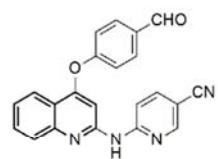

**4-(2',6'-Dimethyl-4'-formylphenoxy)-2-(5''-cyanopyridin-2''-ylamino)quinoline (6b)**

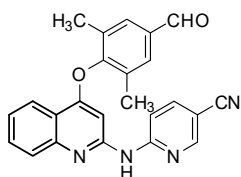

Analysis:

Mp. 275.7-276.5 °C

$^1\text{H-NMR}$  (300 MHz, DMSO- $d_6$ ): 2.20 (s, 6H, ArCH $_3$ -2', 6'), 6.58 (s, 1H, ArH-3), 7.52 (t, 1H,  $J$  = 7 Hz, ArH-3''), 7.77 (td, 1H,  $J$  = 7.8, 16 Hz, ArH-6), 7.82-7.91 (m, 3H, ArH-7, 3', 5'), 8.14 (dd, 1H,  $J$  = 8.8, 2.3 Hz, ArH-8), 8.29 (d, 1H,  $J$  = 7.5 Hz, ArH-5), 8.57 (d, 1H,  $J$  = 1.9 Hz, ArH-4''), 8.65 (d, 1H,  $J$  = 8.9 Hz, ArH-6''), 10.03 (s, 1H, CHO) and 10.37 (s, 1H, NH)

$^{13}\text{C-NMR}$  (75 MHz, DMSO- $d_6$ ): 15.6, 94.8, 97.5, 100.3, 111.8, 117.2, 117.9, 121.3, 124.2, 126.8, 130.7, 130.9, 131.9, 134.1, 141.1, 145.9, 151.9, 153.4, 154.5, 155.9, 159.7 and 160.4

HRMS (+ESI): C $_{24}$ H $_{19}$ N $_4$ O $_2$  [M+H] $^+$  requires 395.1502, found 395.1500

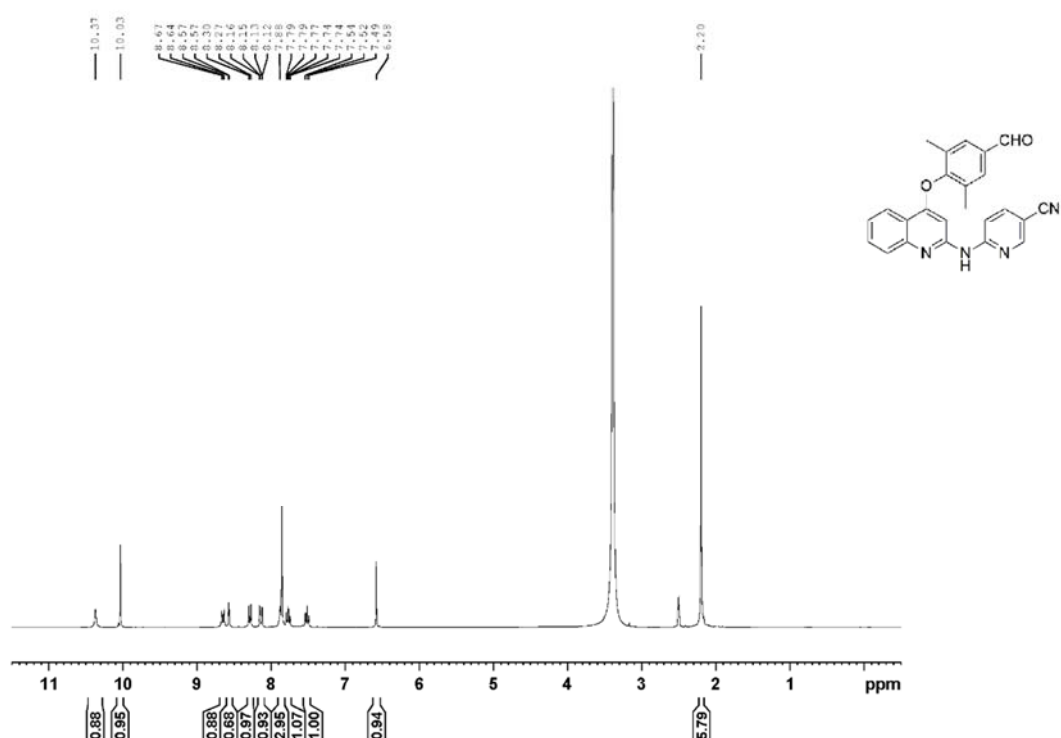

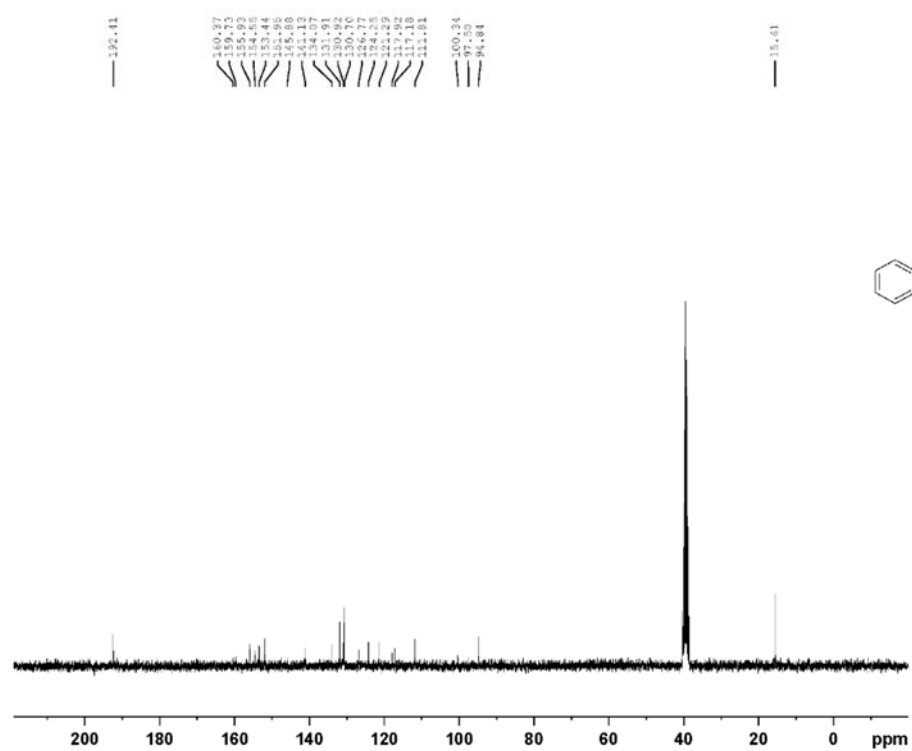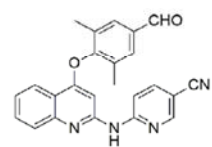

**4-(4'-cyanophenoxy)-2-(5''-cyanopyridin-2''ylamino)quinoline (6c)**

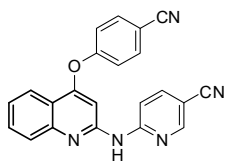

Analysis:

Mp. 225.7-225.9 °C

$^1\text{H-NMR}$  (300 MHz,  $\text{CDCl}_3$ ): 6.86 (s, 1H, ArH-3), 7.30 (d, 2H,  $J = 8.8$  Hz, ArH-2', 6'), 7.46 (td, 1H,  $J = 7.6$  Hz, ArH-3''), 7.70-7.81 (m, 3H, ArH-6, 3', 5'), 7.83-7.94 (m, 2H, ArH-7, 8), 8.11 (dd, 1H,  $J = 8.4, 0.7$ , ArH-5), 8.30 (bs, 2H, ArH-4'', NH) and 8.46 (d, 1H,  $J = 1.7$  Hz, ArH-6'')

$^{13}\text{C-NMR}$  (75 MHz,  $\text{CDCl}_3$ ): 98.8, 102.0, 112.3, 117.4, 118.1, 120.9, 121.7, 124.9, 131.5, 134.6, 140.8, 140.9 and 151.7

HRMS (+ESI):  $\text{C}_{22}\text{H}_{14}\text{N}_5\text{O}$   $[\text{M}+\text{H}]^+$  requires 364.1193, found 364.1193

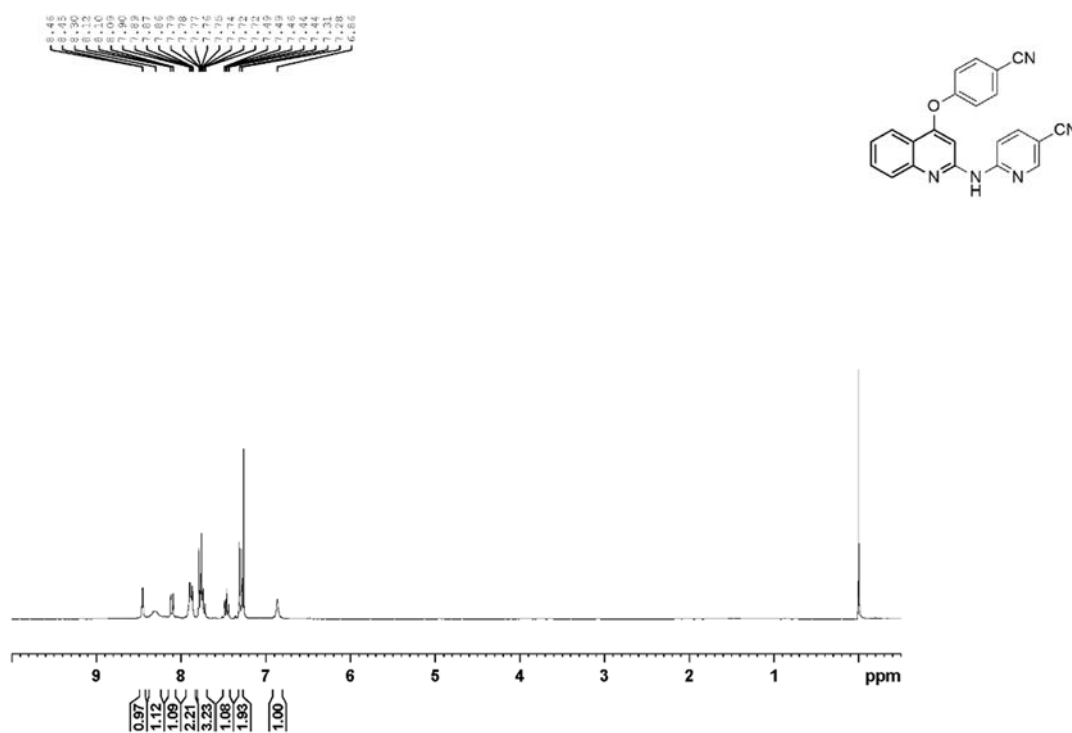

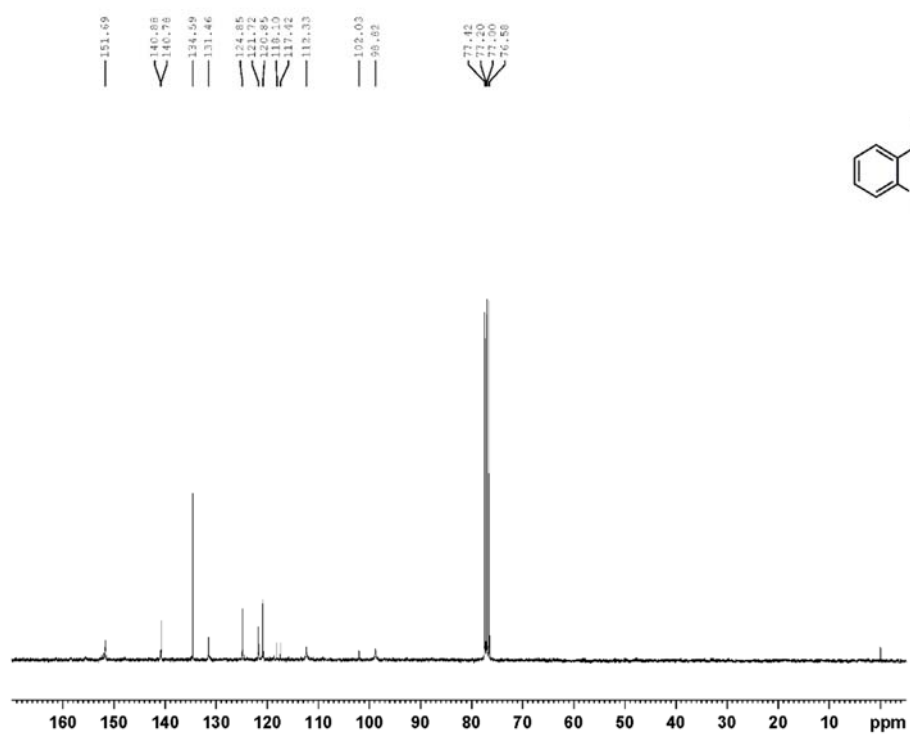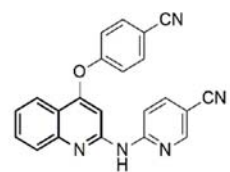

**4-(2',6'-Dimethyl 4'-cyanophenoxy)-2-(5''-cyanopyridin-2''ylamino)quinoline (6d)**

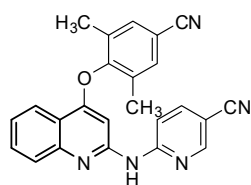

Analysis:

Mp. 229.4-230.3 °C

$^1\text{H-NMR}$  (300 MHz,  $\text{CDCl}_3$ ): 2.21 (s, 6H,  $\text{ArCH}_3$ -2', 6'), 6.12 (s, 1H,  $\text{ArH}$ -3), 7.43-7.57 (m, 3H,  $\text{ArH}$ -3'', 3', 5'), 7.75 (td, 1H,  $J = 7.8, 1.4$  Hz,  $\text{ArH}$ -6), 7.82-7.97 (m, 2H,  $\text{ArH}$ -7, 8), 8.23-8.44 (m, 3H,  $\text{ArH}$ -5, 4'', NH) and 8.58 (d, 1H,  $J = 8.3$  Hz,  $\text{ArH}$ -6'')

$^{13}\text{C-NMR}$  (75 MHz,  $\text{CDCl}_3$ ): 15.9, 93.8, 101.7, 110.0, 112.3, 117.5, 117.7, 118.2, 121.5, 124.5, 127.2, 131.1, 132.9, 133.1, 140.8, 148.3, 151.6, 152.5, 153.6, 155.7 and 160.6

HRMS (+ESI):  $\text{C}_{24}\text{H}_{18}\text{N}_5\text{O}$   $[\text{M}+\text{H}]^+$  requires 392.1506, found 392.1494

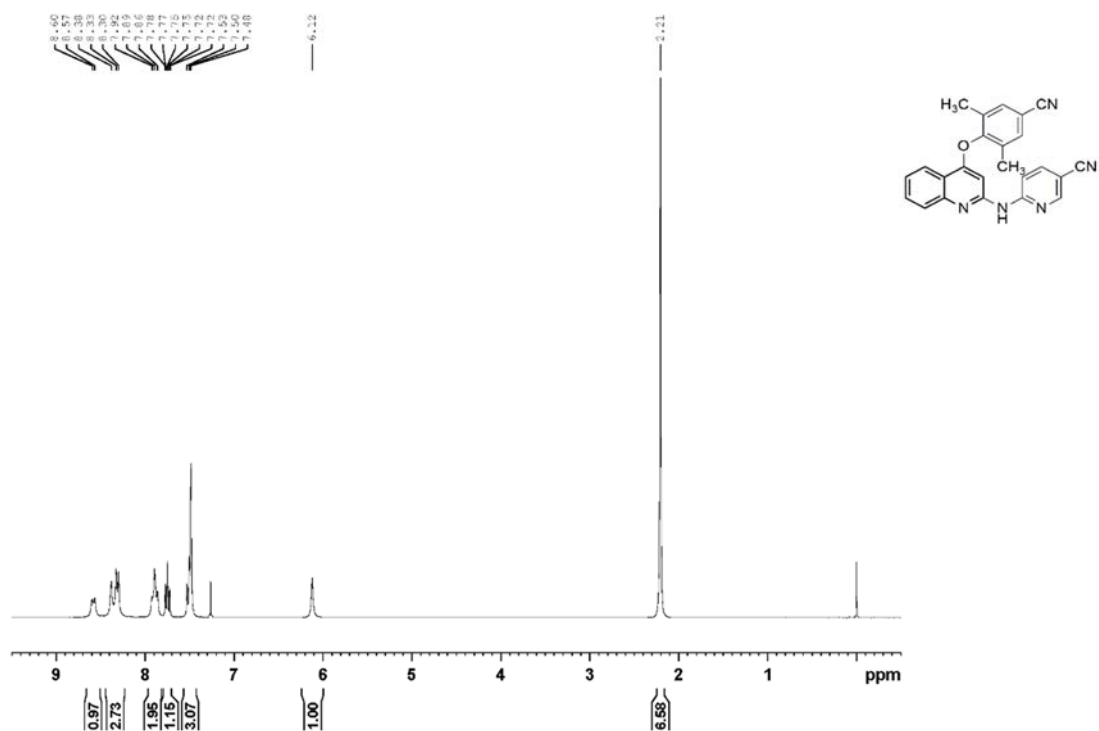

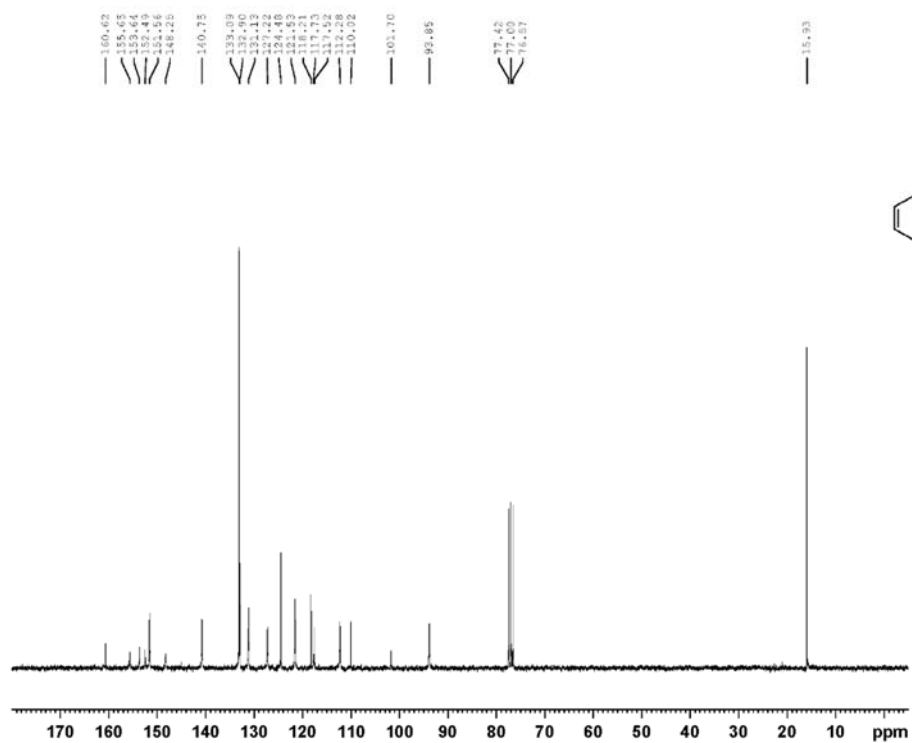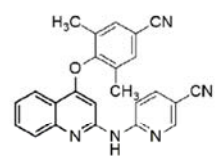

**4,4'-di-(4'-formylphenoxy)-2,2'-biquinoline (7a)**

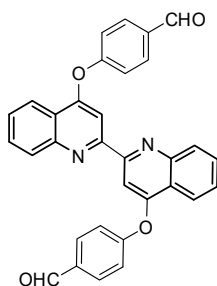

Analysis:

Mp. 288.7-289.3 °C

$^1\text{H-NMR}$  (300 MHz,  $\text{CDCl}_3$ ): 7.33-7.42 (m, 4H, 2 $\times$ ArH-2', 6'), 7.59 (td, 2H, J = 7.7, 1.1 Hz, 2 $\times$ ArH-3), 7.76 (td, 2H, J = 7.7, 1.4 Hz, 2 $\times$ ArH-6), 7.98-8.06 (m, 4H, 2 $\times$ ArH-3', 7'), 8.11 (d, 2H, J = 8.3 Hz, 2 $\times$ ArH-8), 8.21-8.30 (m, 4H, 2 $\times$ ArH-5, 5') and 10.0 (s, 2H, 2 $\times$ CHO)

$^{13}\text{C-NMR}$  (75 MHz,  $\text{CDCl}_3$ ): 105.1, 120.1, 121.7, 122.1, 127.2, 129.8, 130.4, 130.5, 132.2, 133.1, 149.6, 157.0, 160.4, 160.7 and 190.8

HRMS (+ESI):  $\text{C}_{32}\text{H}_{21}\text{N}_2\text{O}_4$   $[\text{M}+\text{H}]^+$  requires 497.1496, found 497.1491

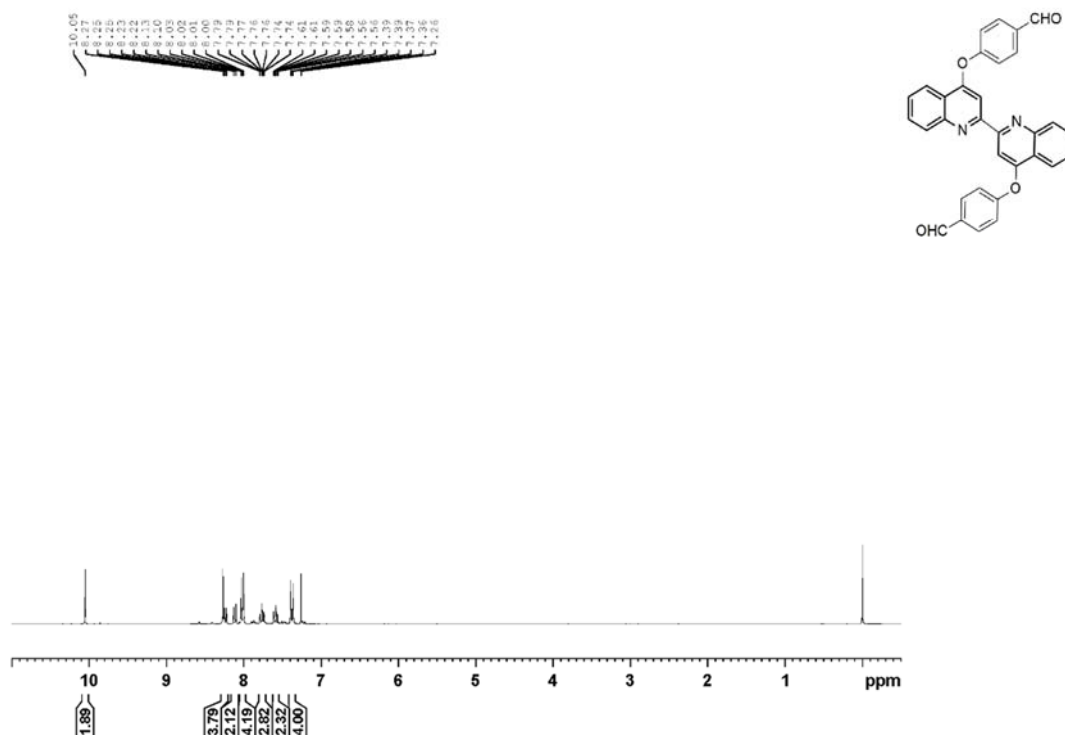

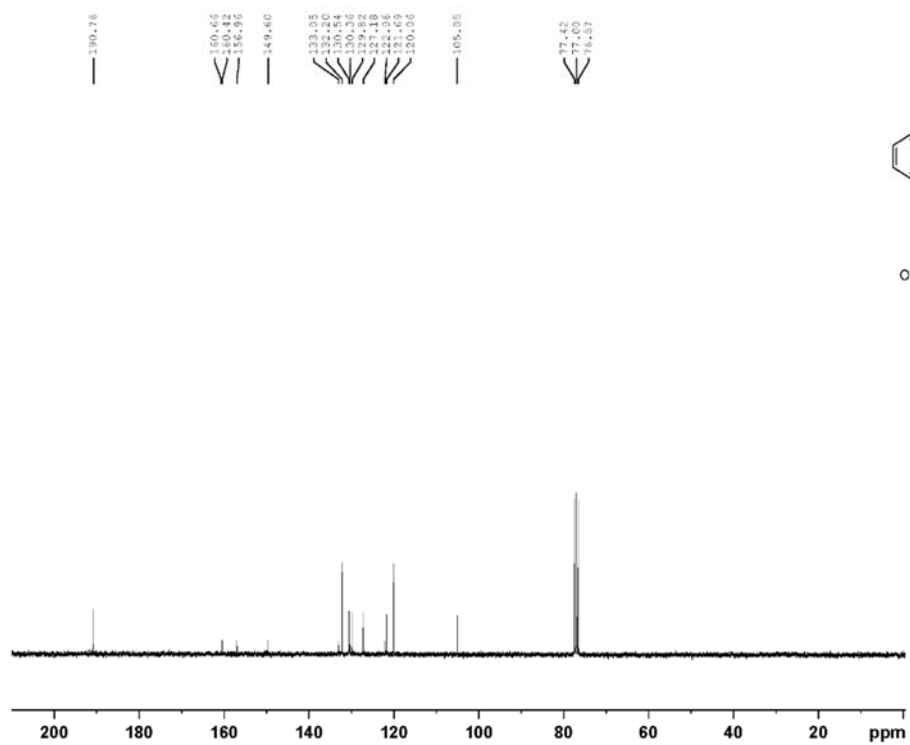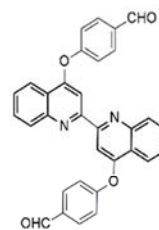

### 4,4'-di-(2',6'-Dimethyl-4'-formylphenoxy)-2,2'-biquinoline (7b)

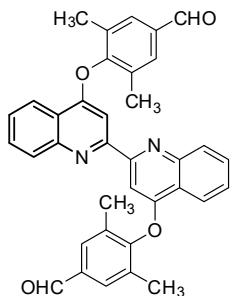

Analysis:

Mp. 300 °C (Decomposed)

$^1\text{H-NMR}$  (300 MHz,  $\text{CDCl}_3 + \text{CD}_3\text{OD}$ ): 2.27 (s, 12H,  $2\times\text{ArCH}_3$ -2', 6'), 7.55 (s, 2H,  $2\times\text{ArH}$ -3), 7.59-7.69 (m, 2H,  $2\times\text{ArH}$ -6), 7.71-7.86 (m, 6H,  $2\times\text{ArH}$ -7, 3', 5'), 8.04 (d, 2H,  $J = 8.3$  Hz,  $2\times\text{ArH}$ -8), 8.45 (d, 2H,  $J = 8.1$  Hz,  $2\times\text{ArH}$ -5) and 10.0 (s, 2H,  $2\times\text{CHO}$ )

$^{13}\text{C-NMR}$  (75 MHz,  $\text{CDCl}_3 + \text{CD}_3\text{OD}$ ): 16.1, 100.0, 120.5, 121.4, 126.7, 129.3, 130.3, 130.9, 132.4, 133.9, 149.0, 155.3, 157.1 and 160.1

HRMS (+ESI):  $\text{C}_{36}\text{H}_{29}\text{N}_2\text{O}_4$   $[\text{M}+\text{H}]^+$  requires 553.2122, found 553.2116

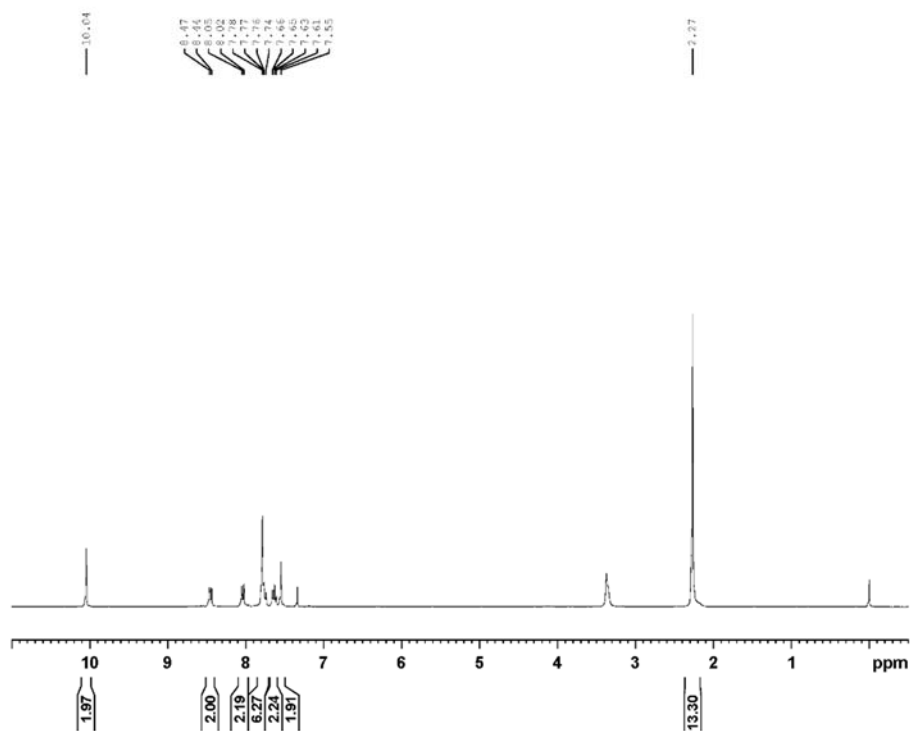

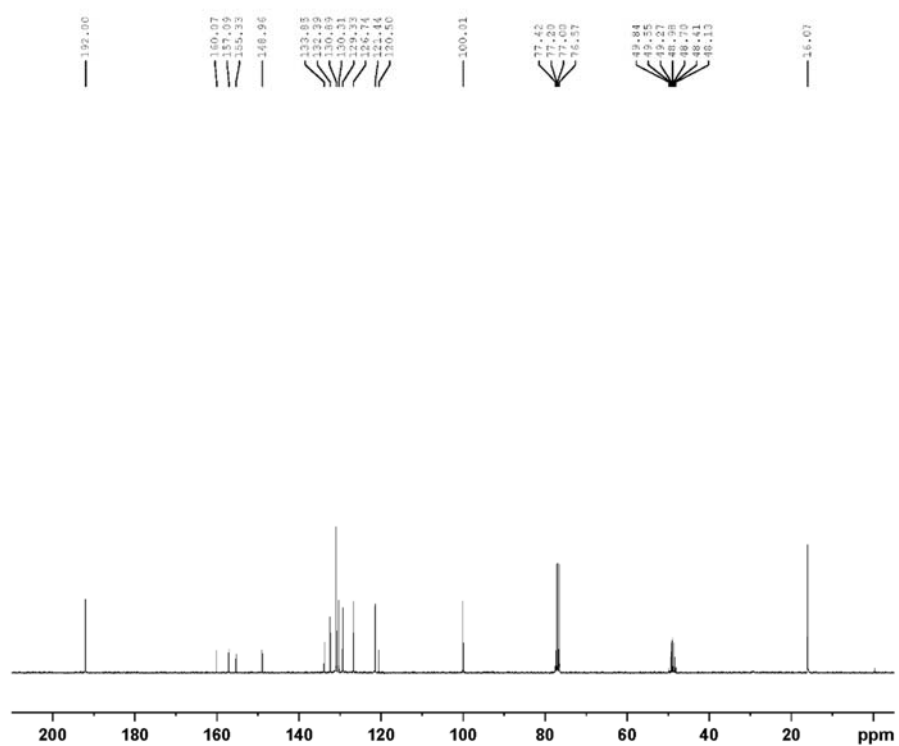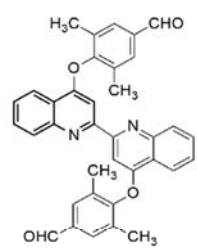

**2-(4'-formylphenoxy)-4-(4''-cyanophenyl)-aminoquinoline (8a)**

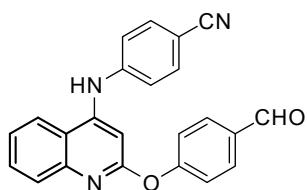

Analysis:

Mp. 238.5 °C – 238.9 °C

$^1\text{H-NMR}$  (400 MHz,  $\text{CDCl}_3 + \text{CD}_3\text{OD}$ ): 6.95 (s, 1H, ArH-3), 7.36-7.40 (m, 2H, ArH-2'', 6''), 7.41-7.45 (m, 3H, ArH-2', 6', NH), 7.50 (td, 1H,  $J = 6.0, 2.0$  Hz, ArH-6), 7.64-7.71 (m, 3H, ArH-7, 3'', 5''), 7.79 (d, 1H,  $J = 8.0, 2.0$  Hz, ArH-8), 7.95 (dt, 2H,  $J = 8.0, 2.0$  Hz, ArH-3', 5'), 8.13 (d, 1H,  $J = 8.0$  Hz, ArH-5), and 9.97 (s, 1H, CHO)

$^{13}\text{C-NMR}$  (75 MHz,  $\text{CDCl}_3 + \text{CD}_3\text{OD}$ ): 95.0, 104.6, 113.8, 118.8, 119.2, 119.8, 120.2, 121.1, 124.6, 127.5, 130.3, 131.4, 132.1, 133.4, 145.3, 146.9, 149.5, 159.6, 161.3 and 191.4

HRMS (+ESI):  $\text{C}_{23}\text{H}_{16}\text{N}_3\text{O}_2$   $[\text{M}+\text{H}]^+$  requires 366.1237, found 366.1244

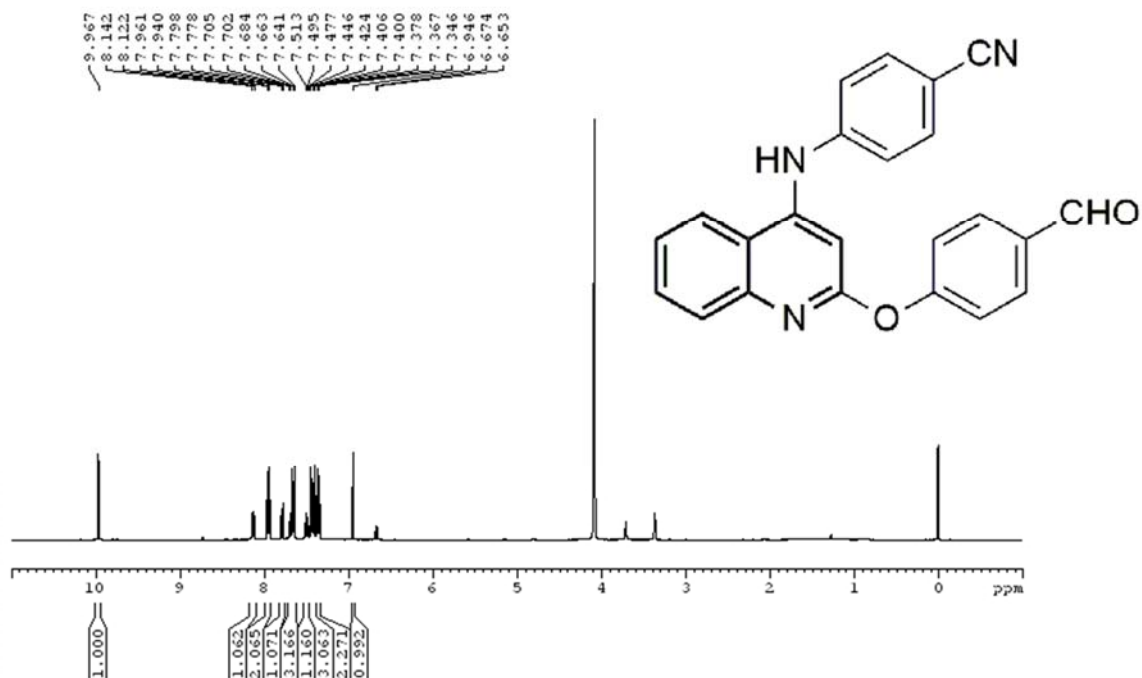

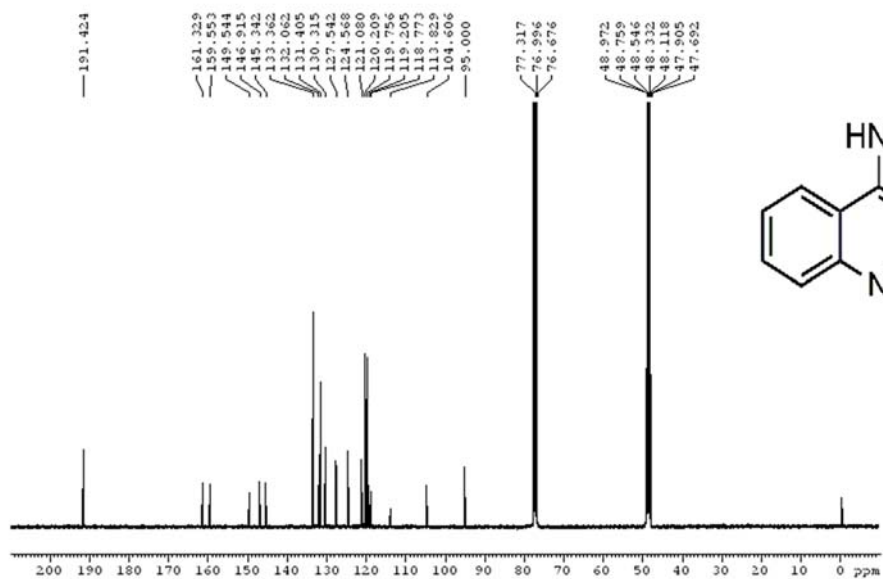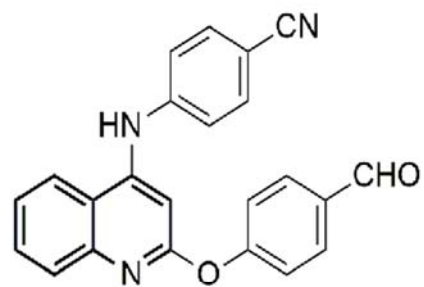

**2-(2',6'-Dimethyl-4'-formylphenoxy)-4-(4''-cyanophenyl)-aminoquinoline (8b).**

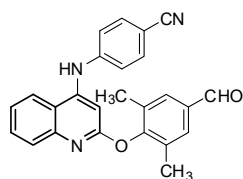

Analysis:

Mp. 200.0-201.3 °C

$^1\text{H-NMR}$  (300 MHz,  $\text{CDCl}_3$ ): 2.21 (s, 6H,  $\text{ArCH}_3$ -2', 6'), 6.86 (s, 1H, NH), 6.98 (s, 1H, ArH-3), 7.35 (s, 1H, ArH-3'), 7.36 (s, 1H, ArH-5'), 7.42 (td, 1H,  $J = 7.6, 1.5$  Hz, ArH-6'), 7.60 (td, 1H,  $J = 7.5, 1.2$  Hz, ArH-7), 7.63-7.73 (m, 5H, ArH-8, 2'', 3'', 5'', 6''), 7.85 (d, 1H,  $J = 7.8$  Hz, ArH-5), 9.97 (s, 1H, CHO)

$^{13}\text{C-NMR}$  (75 MHz,  $\text{CDCl}_3$ ): 16.8, 94.3, 105.9, 118.6, 118.9, 119.7, 119.8, 124.4, 128.9, 130.3, 132.6, 133.5, 133.9, 144.8, 147.7, 147.8, 155.7, 161.3 and 191.8

HRMS (+ESI):  $\text{C}_{25}\text{H}_{20}\text{N}_3\text{O}_2$   $[\text{M}+\text{H}]^+$  requires 394.1550, found 394.1542

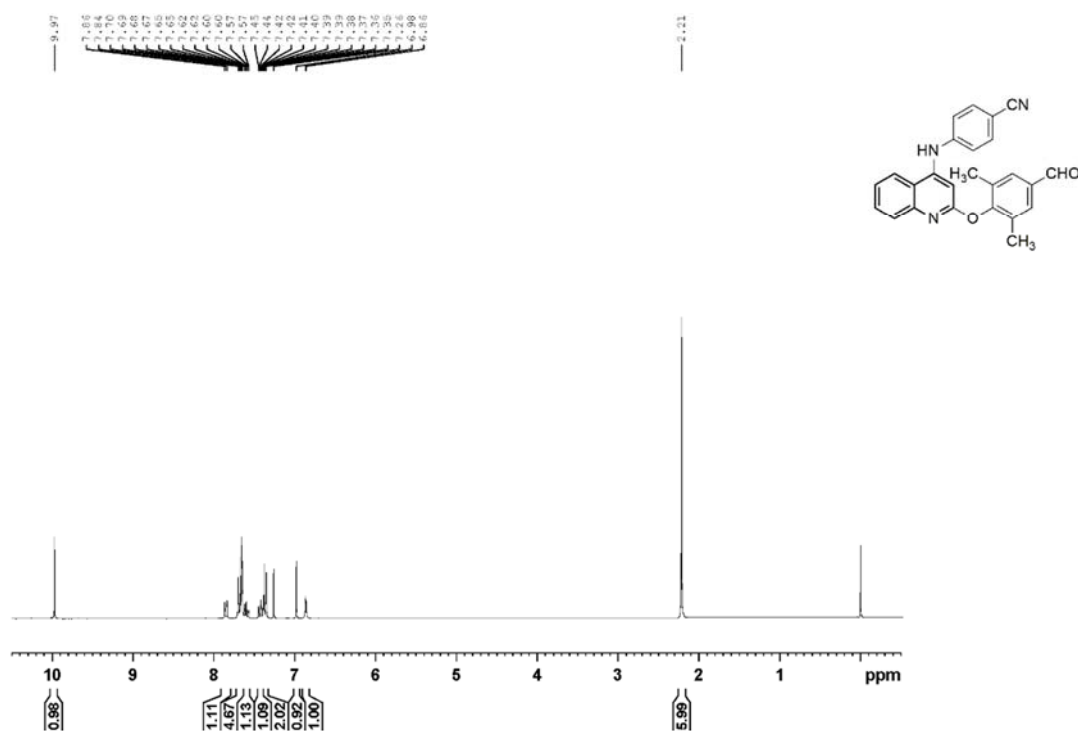

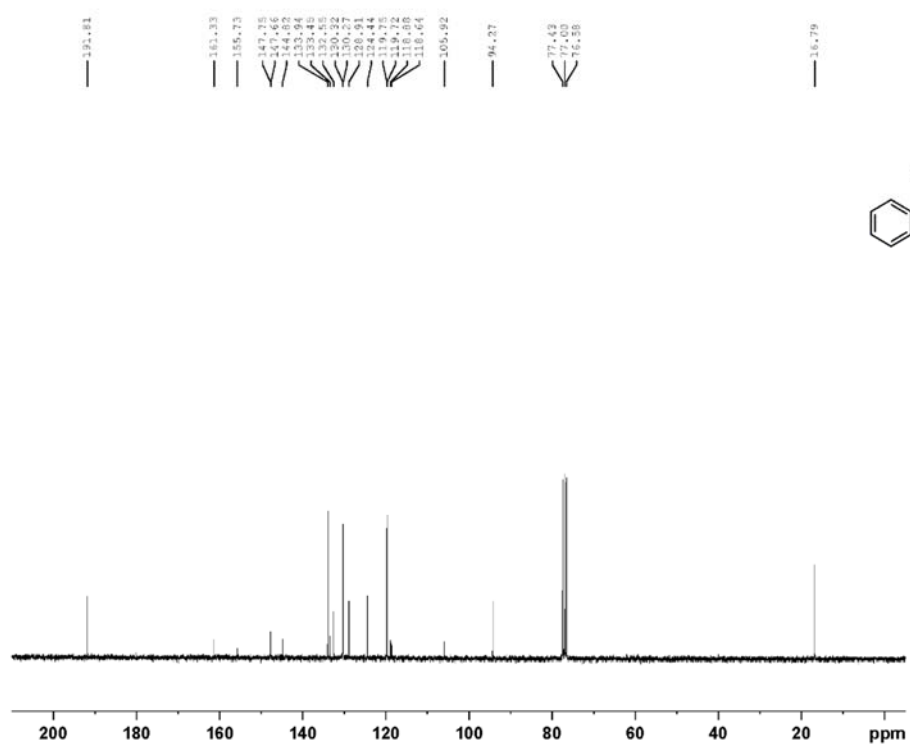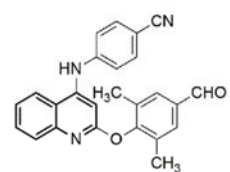

**2-(4'-cyanophenoxy)-4-(4''-cyanophenyl)-aminoquinoline (8c).**

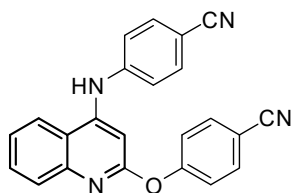

Analysis:

Mp. 187.5 °C - 188.0 °C.

<sup>1</sup>H-NMR (400 MHz, CD<sub>3</sub>OD): 6.87 (s, 1H, ArH-3), 7.37 (d, 2H, J = 8.8 Hz, ArH-2'', 6''), 7.45–7.47 (m, 1H, ArH-6), 7.49 (d, 2H, J = 8.8 Hz, ArH-2', 6'), 7.56–7.58 (m, 1H, ArH-7), 7.61–7.65 (m, 1H, ArH-8), 7.76 (d, 2H, J = 8.8 Hz, ArH-3'', 5''), 7.85 (d, 2H, J = 8.8 Hz, ArH-3', 5'), 8.25 (d, 1H, J = 8.0 Hz, ArH-5) and 9.49 (s, 1H, NH)

<sup>13</sup>C-NMR (100 MHz, DMSO-d<sub>6</sub>): 95.1, 104.4, 107.3, 119.2, 119.7, 119.7, 120.5, 122.6, 122.9, 124.9, 128.2, 131.0, 134.2, 134.5, 146.1, 147.2, 149.7, 158.0 and 161.9

HRMS (+ESI) was C<sub>23</sub>H<sub>15</sub>N<sub>4</sub>O [M+H]<sup>+</sup>; it requires 363.1240, but has 363.1245.

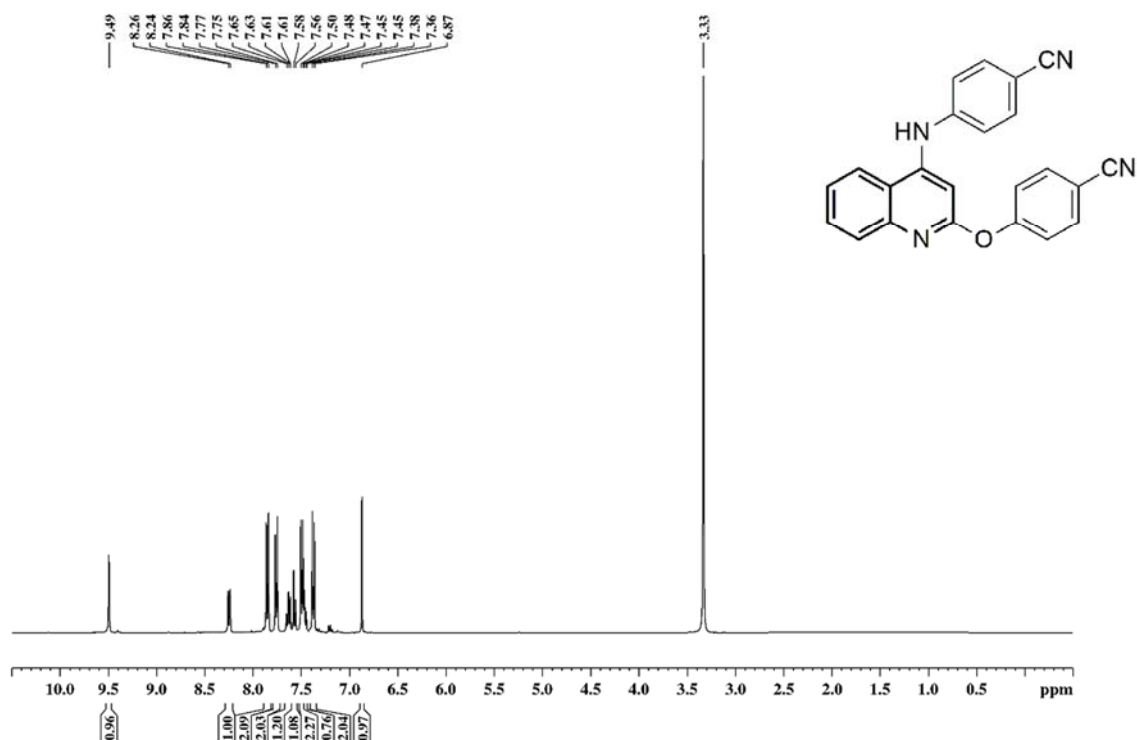

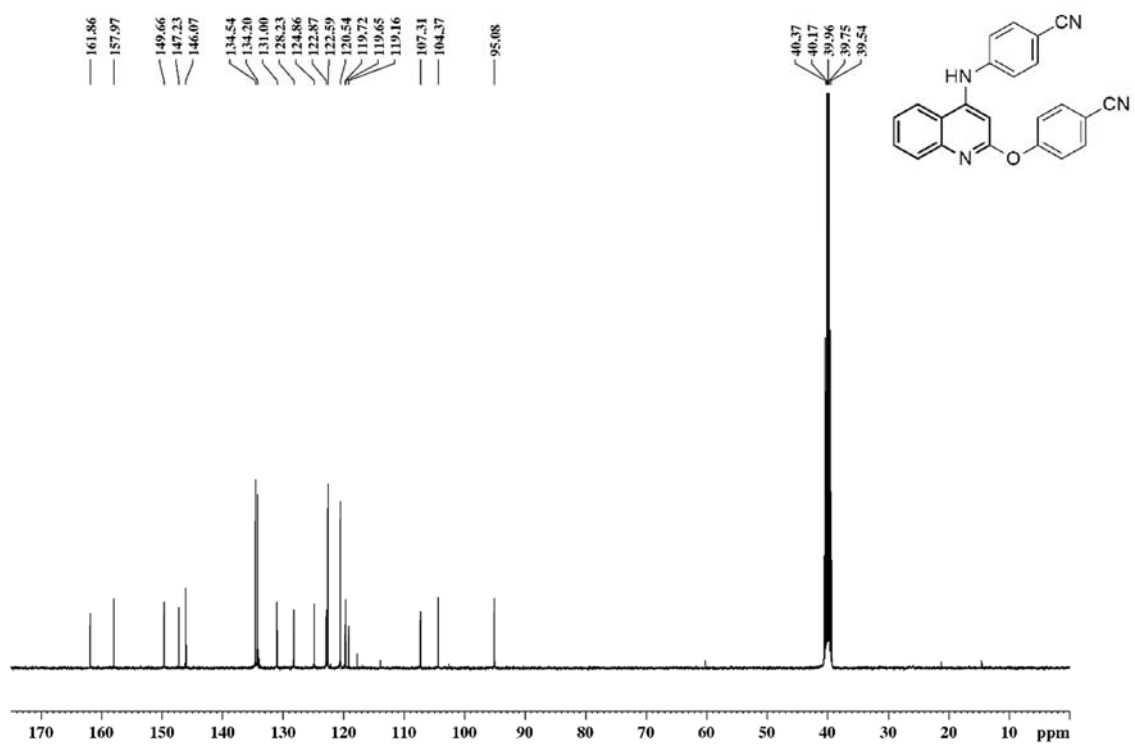

**2-(2',6'-Dimethyl-4'-cyanophenoxy)-4-(4''-cyanophenyl)-aminoquinoline (8d).**

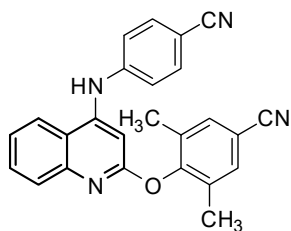

Analysis:

Mp. 201.3 °C – 202.0 °C

<sup>1</sup>H-NMR (400 MHz, CDCl<sub>3</sub>): 2.16 (s, 6H, ArCH<sub>3</sub>-2', 6'), 6.98 (s, 1H, ArH-3), 7.02 (bs, 1H, NH), 7.38-7.44 (m, 5H, ArH-6, 2'', 3'', 5'', 6''), 7.58-7.65 (m, 2H, ArH-7, 8), 7.69 (d, 2H, J = 12 Hz, ArH-3', 5') and 7.89 (d, 1H, J = 8.0 Hz, ArH-5)

<sup>13</sup>C-NMR (100 MHz, CDCl<sub>3</sub>): 16.0, 94.0, 105.8, 108.7, 114.4, 118.7, 118.9, 119.1, 119.8, 120.0, 124.5, 128.8, 130.3, 132.4, 133.1, 133.8, 133.8, 144.8, 147.5, 148.0, 154.3, and 161.1

HRMS (+ESI): C<sub>25</sub>H<sub>19</sub>N<sub>4</sub>O [M+H]<sup>+</sup> requires 391.1553, found 391.1561

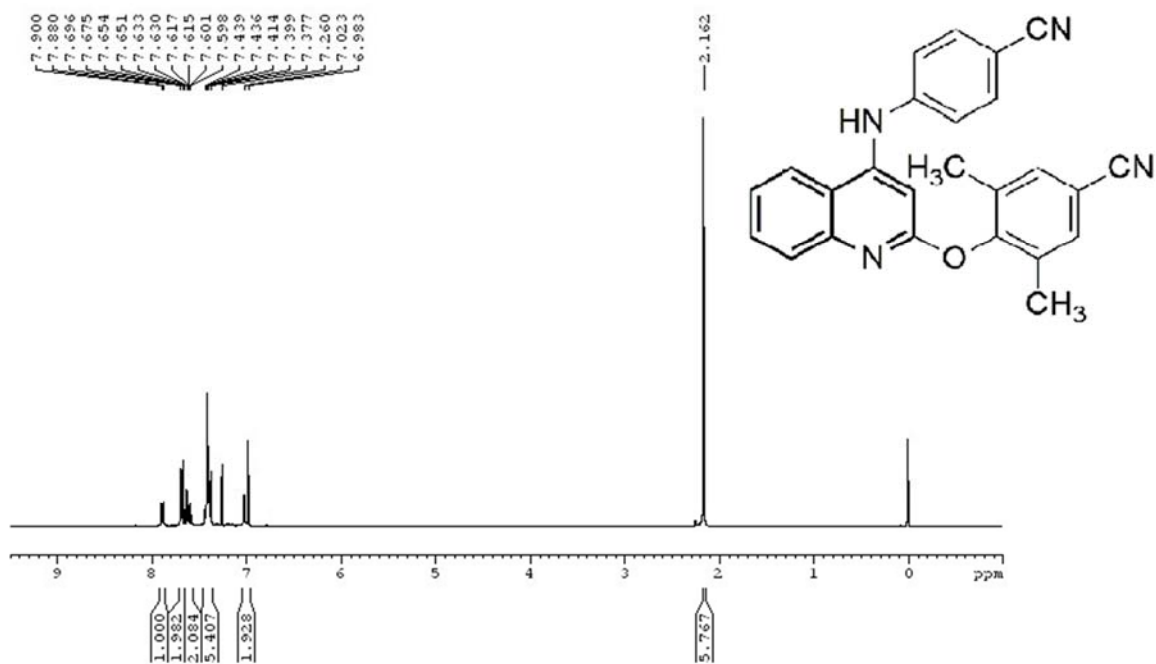

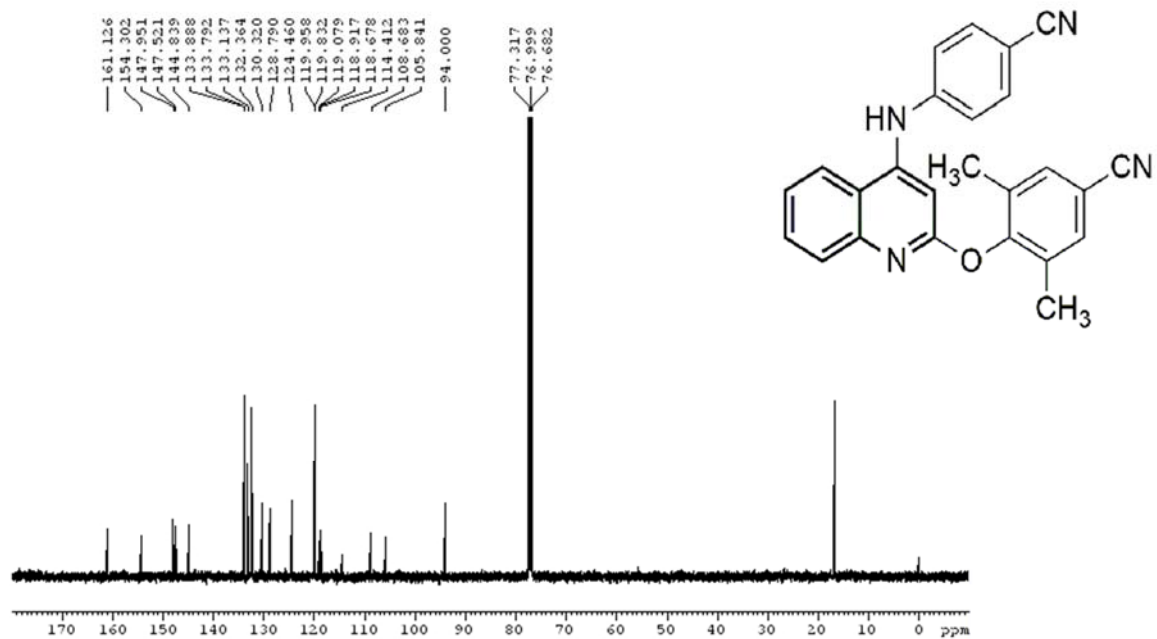

### Scheme 3

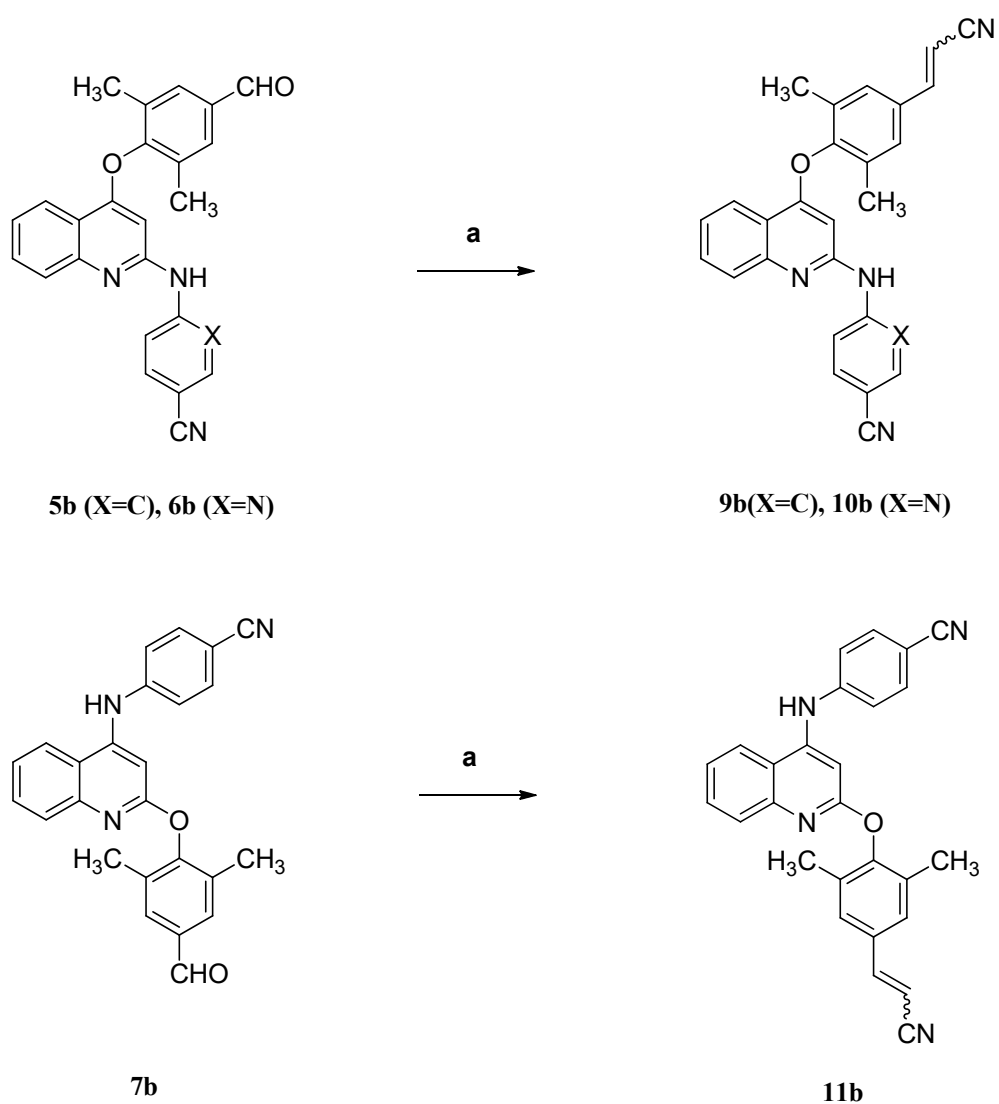

Synthesis of **9b**, **10b**, and **11b**. Reagents and conditions: a Potassium tert-butoxide (1.5 eq.), diethyl cyanomethyl phosphonate (1.5 eq.), THF, 0-25 °C.

**4-(4'-(2''-(E)-cyanovinyl)-2',6'-dimethyl-phenoxy)-2-(4''-cyanophenyl)-aminoquinoline (9b-cis isomer).**

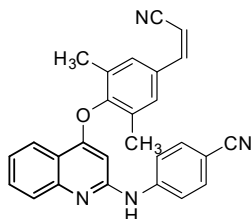

Analysis:

Mp. 217.3-217.9 °C

$^1\text{H-NMR}$  (300 MHz,  $\text{CDCl}_3$ ): 2.20 (s, 6H,  $\text{ArCH}_3$ -2', 6'), 5.47 (d, 1H,  $J = 12.1$ , Vinyl-H), 5.74 (s, 1H,  $\text{ArH}$ -3), 6.78 (bs, 1H, NH), 7.12 (d, 1H,  $J = 12.1$  Hz, Vinyl-H), 7.45 (td, 1H,  $J = 7.4$ , 1.1 Hz,  $\text{ArH}$ -6), 7.52-7.66 (m, 4H,  $\text{ArH}$ -3', 5', 2'', 6''), 7.71 (td, 1H,  $J = 7.7$ , 1.4 Hz,  $\text{ArH}$ -7), 7.81-7.94 (m, 3H,  $\text{ArH}$ -8, 3'', 5'') and 8.29 (dd, 1H,  $J = 8.3$ , 1.0 Hz,  $\text{ArH}$ -5)

$^{13}\text{C-NMR}$  (75 MHz,  $\text{CDCl}_3$ ): 16.1, 93.0, 95.2, 104.0, 117.3, 117.7, 118.2, 119.5, 121.6, 123.9, 127.2, 128.4, 130.1, 130.9, 131.5, 131.9, 133.2, 144.6, 147.9, 148.6, 152.1, 153.5 and 161.1

HRMS (+ESI):  $\text{C}_{27}\text{H}_{21}\text{N}_4\text{O}$   $[\text{M}+\text{H}]^+$  requires 417.1710, found 417.1712

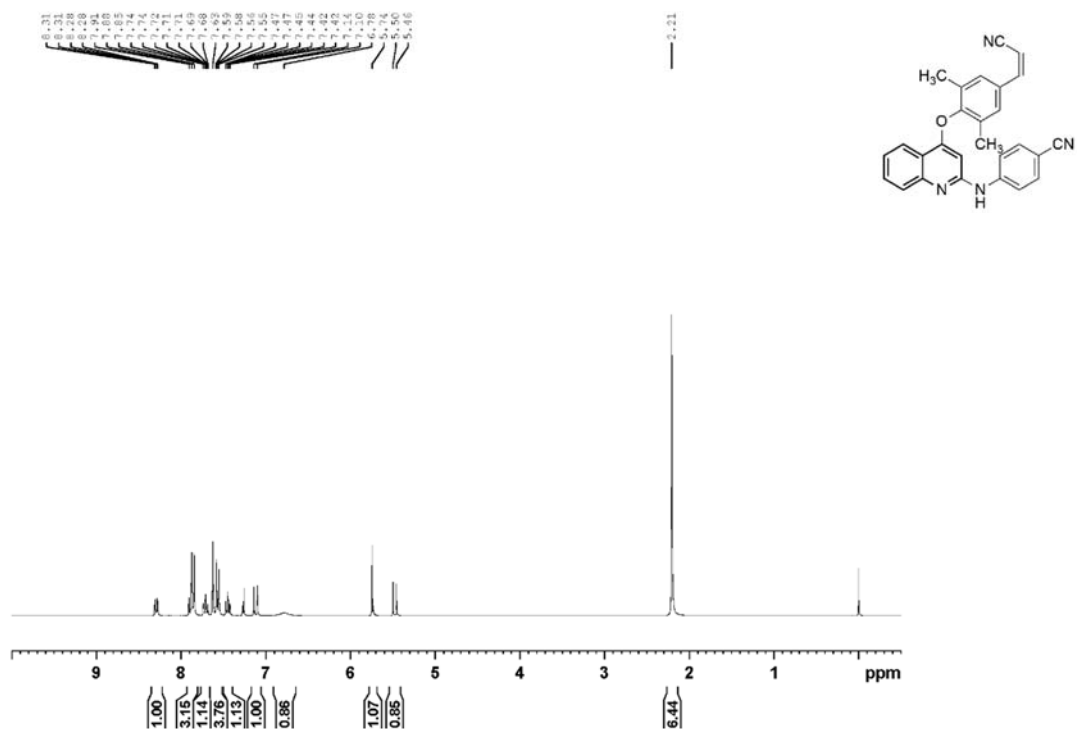

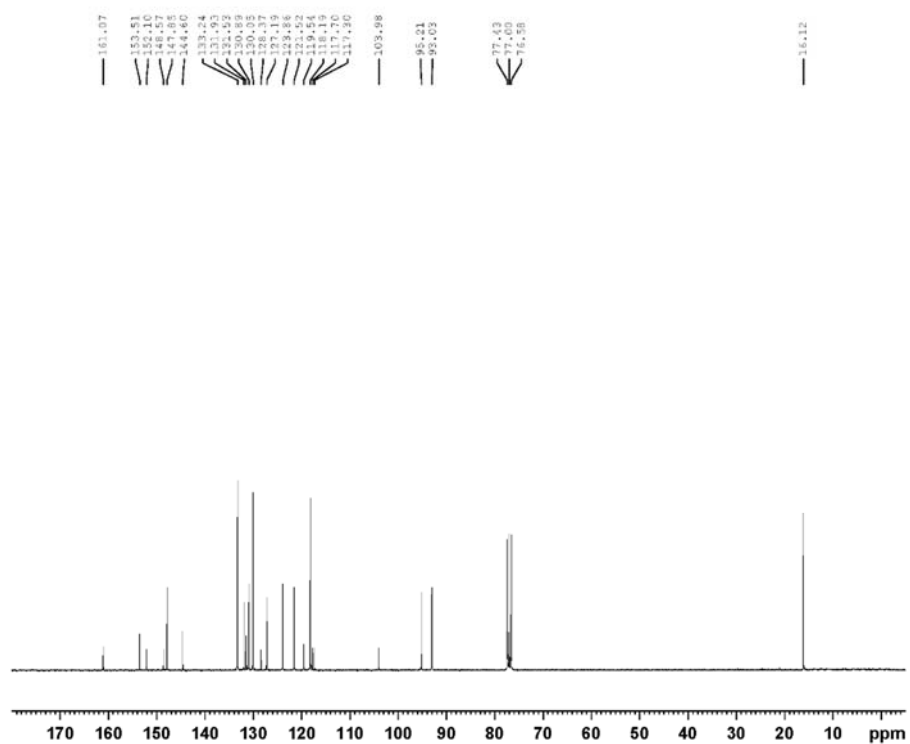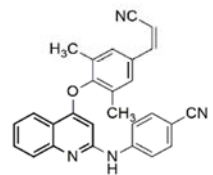

**4-(4'-(2''-(E)-cyanovinyl)-2',6'-dimethoxy)-2-(4''-cyanophenyl)-aminoquinoline (9b-trans isomer).**

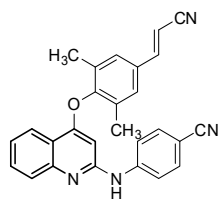

Analysis:

Mp. 214.4-215.1 °C

<sup>1</sup>H-NMR (300 MHz, CDCl<sub>3</sub>+CD<sub>3</sub>OD): 2.20 (s, 6H, ArCH<sub>3</sub>-2', 6'), 5.82 (s, 1H, ArH-3), 5.92 (d, 1H, J = 16.6 Hz, Vinyl-H), 7.30 (s, 2H, ArH-3', 5'), 7.41 (d, 1H, J = 16.6 Hz, Vinyl-H), 7.40-7.48 (m, 1H, ArH-6), 7.56 (d, 2H, J = 8.7 Hz, ArH-2'', 6''), 7.66-7.76 (m, 1H, ArH-7), 7.84-7.94 (m, 3H, ArH-8, 3'', 5'') and 8.28 (dd, 1H, J = 8.1, 1.0 Hz, ArH-5)

<sup>13</sup>C-NMR (75 MHz, CDCl<sub>3</sub>+CD<sub>3</sub>OD): 15.8, 93.2, 95.9, 102.9, 117.48, 117.9, 119.6, 121.3, 123.5, 126.8, 128.2, 130.6, 131.2, 132.1, 133.0, 145.1, 148.4, 149.8, 152.5, 154.0 and 160.7

HRMS (+ESI): C<sub>27</sub>H<sub>21</sub>N<sub>4</sub>O [M+H]<sup>+</sup> requires 417.1710, found 417.1699

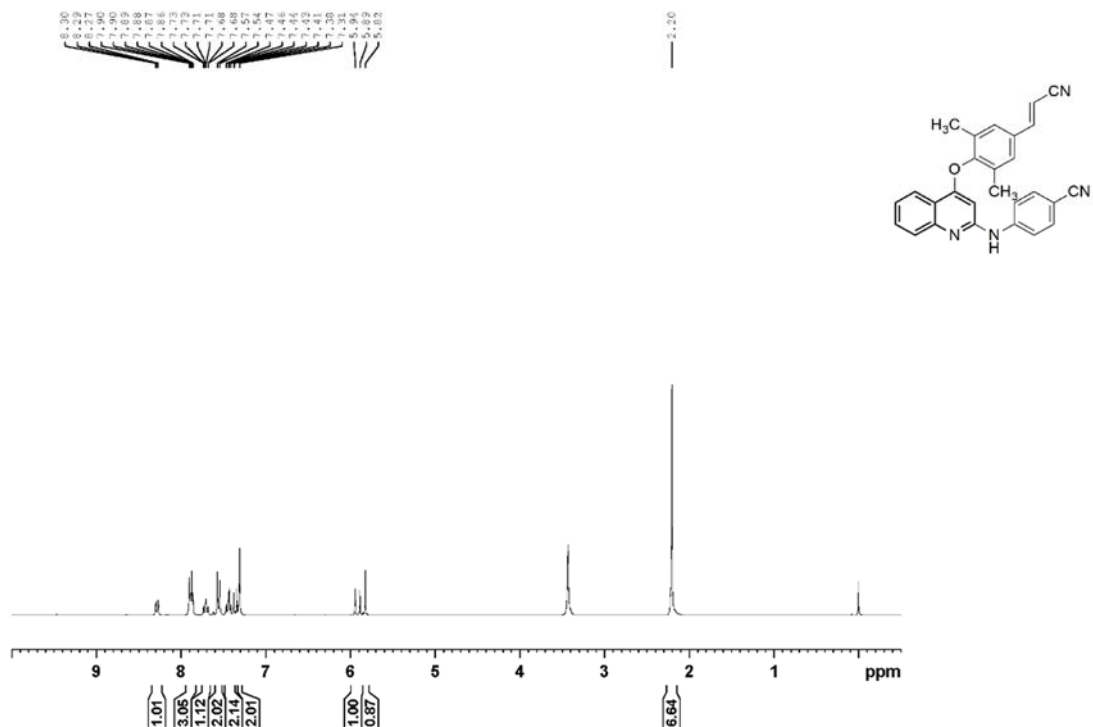

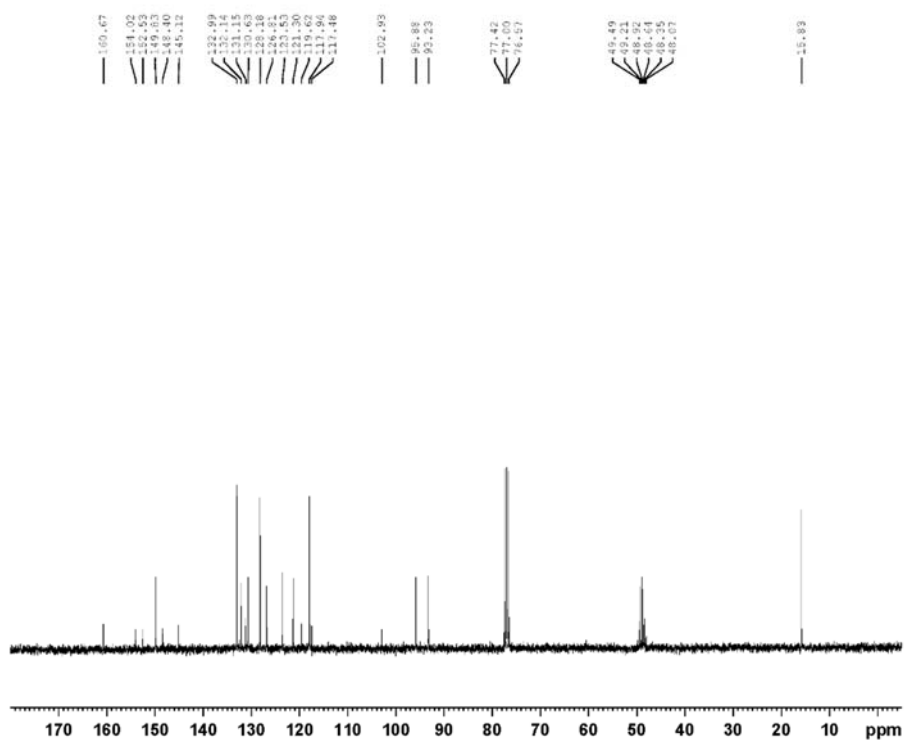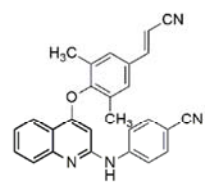

**4-(4'-(2''-(Z)-cyanovinyl)-2',6'-dimethyl-phenoxy)-2-(5''-cyanopyridin-2''ylamino)-aminoquinoline (10b-cis isomer).**

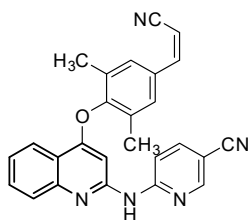

Analysis:

Mp. 239.6-239.9 °C

$^1\text{H-NMR}$  (300 MHz,  $\text{CDCl}_3$ ): 2.20 (s, 6H,  $\text{ArCH}_3$ -2', 6'), 5.49 (d, 1H,  $J = 12.1$  Hz, Vinyl-H), 6.11 (s, 1H,  $\text{ArH}$ -3), 7.13 (d, 1H,  $J = 12.1$  Hz, Vinyl-H), 7.49 (t, 1H,  $J = 7.7$  Hz,  $\text{ArH}$ -3''), 7.64 (s, 2H,  $\text{ArH}$ -3', 5'), 7.74 (td, 1H,  $J = 7.6, 1.2$  Hz,  $\text{ArH}$ -6), 7.81-7.95 (m, 3H,  $\text{ArH}$ -5, 7, 8), 8.07 (bs, 1H, NH), 8.27-8.43 (m, 3H,  $\text{ArH}$ -5, 4'') and 8.58 (d, 1H,  $J = 8.6$  Hz,  $\text{ArH}$ -6'')

$^{13}\text{C-NMR}$  (75 MHz,  $\text{CDCl}_3$ ): 16.1, 93.9, 95.2, 96.5, 112.2, 117.2, 117.6, 118.0, 121.7, 124.3, 127.2, 128.4, 130.1, 131.0, 131.6, 131.8, 140.7, 147.7, 148.3, 149.5, 151.6, 152.0, 152.5, 155.7 and 161.2

HRMS (+ESI):  $\text{C}_{26}\text{H}_{20}\text{N}_5\text{O}$   $[\text{M}+\text{H}]^+$  requires 418.1662, found 418.1657

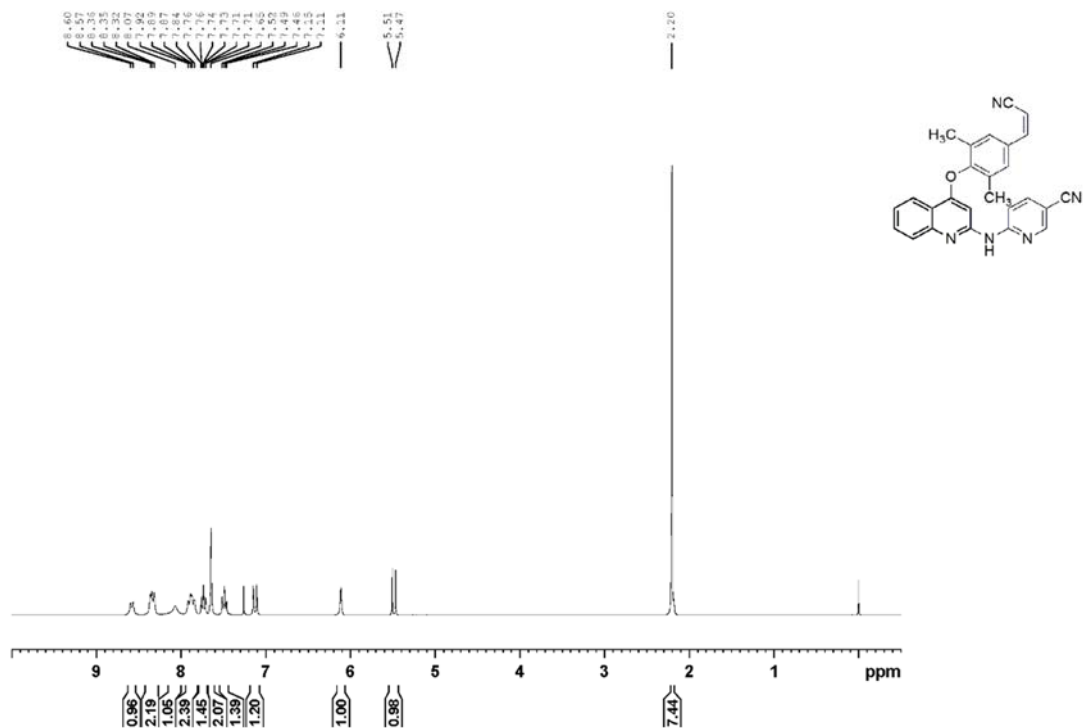

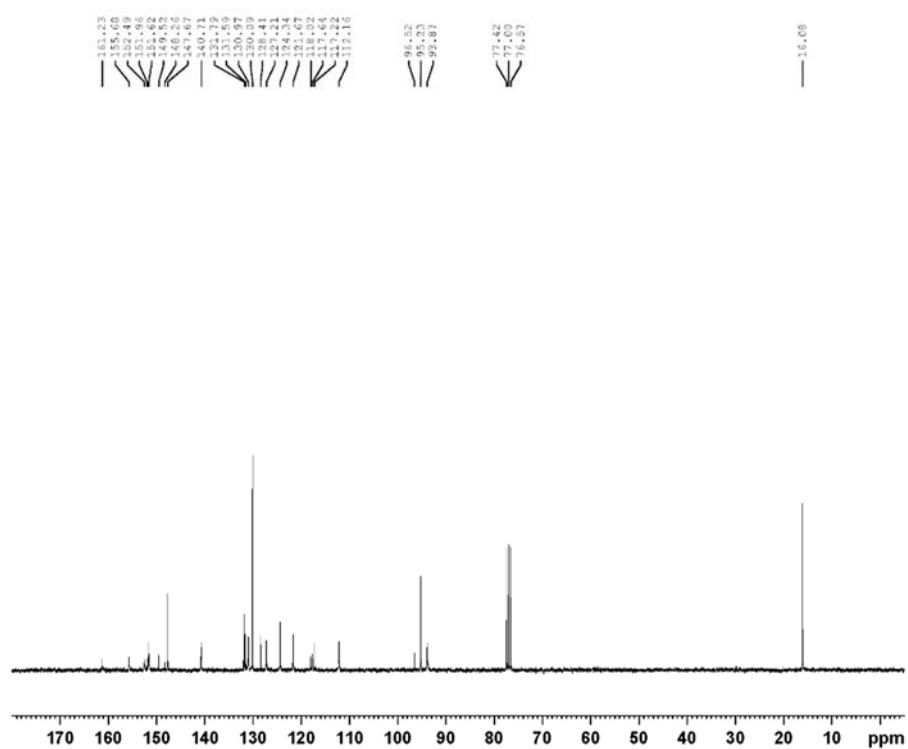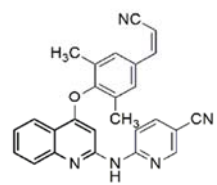

**4-(4'-(2''-(Z)-cyanovinyl)-2',6'-dimethyl-phenoxy)-2-(5''-cyanopyridin-2''ylamino)-aminoquinoline (10b-trans isomer).**

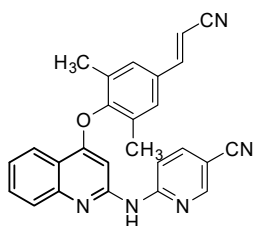

Analysis:

Mp. 236.6-237.4 °C

$^1\text{H-NMR}$  (300 MHz,  $\text{CDCl}_3+\text{CD}_3\text{OD}$ ): 2.21 (s, 6H,  $\text{ArCH}_3$ -2', 6'), 5.93 (d, 1H,  $J = 16.7$  Hz, Vinyl-H), 6.28 (s, 1H,  $\text{ArH}$ -3), 7.32 (s, 2H,  $\text{ArH}$ -3', 5'), 7.41 (d, 1H,  $J = 16.7$  Hz, Vinyl-H), 7.46-7.55 (td, 1H,  $J = 7.6, 1.0$  Hz,  $\text{ArH}$ -3''), 7.69-7.78 (m, 1H,  $\text{ArH}$ -6), 7.81-7.93 (m, 2H,  $\text{ArH}$ -7, 8), 8.28-8.39 (m, 2H,  $\text{ArH}$ -5, 4'') and 8.53 (s, 1H,  $\text{ArH}$ -6'')

$^{13}\text{C-NMR}$  (75 MHz,  $\text{CDCl}_3+\text{CD}_3\text{OD}$ ): 15.8, 96.0, 100.9, 117.5, 117.9, 121.5, 124.2, 128.2, 129.1, 130.8, 131.2, 131.9, 140.5, 149.7, 151.3, 152.3 and 160.9

HRMS (+ESI):  $\text{C}_{26}\text{H}_{20}\text{N}_5\text{O}$   $[\text{M}+\text{H}]^+$  requires 418.1662, found 418.1657

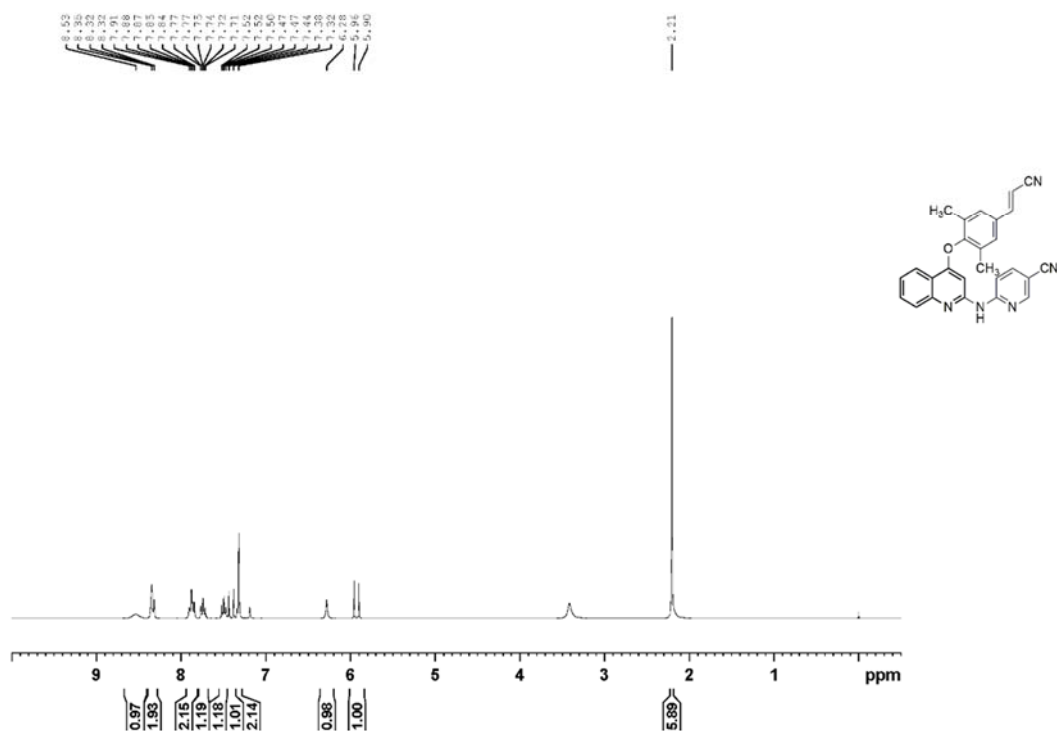

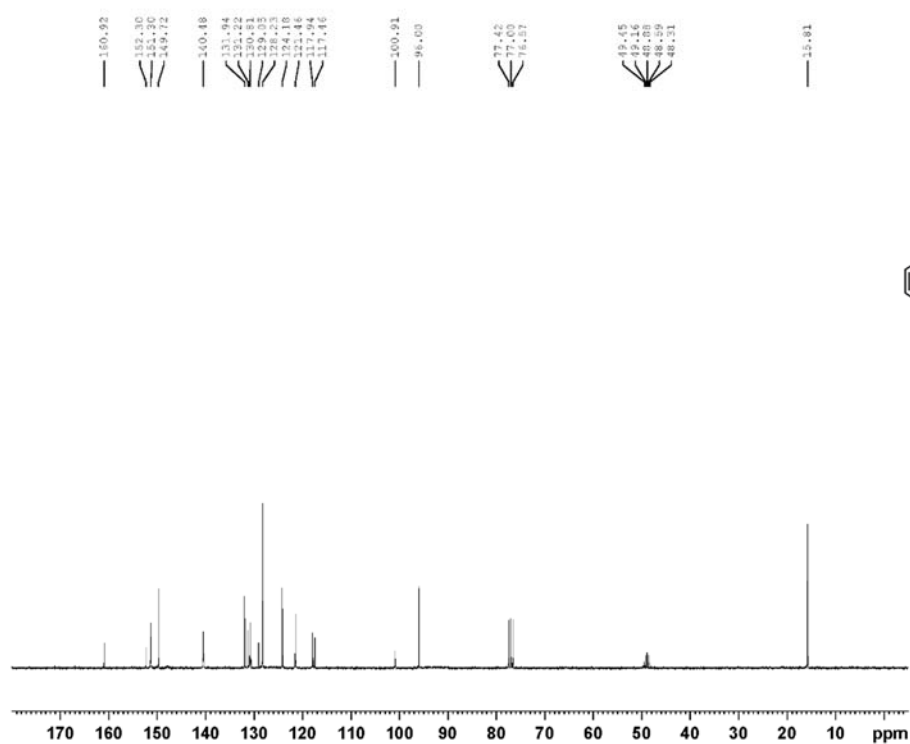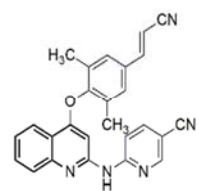

**4-(4'-(2''-(E, Z)-cyanovinyl)-2',6'-dimethyl-phenoxy)-2-(4''-cyanophenyl)-aminoquinoline (11b) (trans: cis isomers; 1: 0.33).**

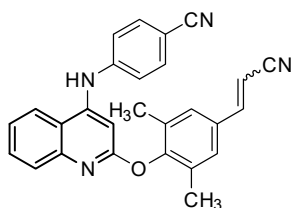

Analysis:

Mp. 180.7-181.0 °C

$^1\text{H-NMR}$  (300 MHz,  $\text{CDCl}_3$ , E, Z mixture): 2.16 (s, 6H,  $\text{ArCH}_3$ -2', 6'), 5.80 (d, 1H,  $J = 16.5$ , Vinyl-H), 6.89-6.99 (m, 1H,  $\text{ArH}$ -3), 7.20 (s, 1H,  $\text{ArH}$ -3', 5'), 7.29-7.39 (m, 3H, Vinyl-H,  $\text{ArH}$ -2'', 6''), 7.54-7.63 (m, 2H,  $\text{ArH}$ -3'', 5''), 7.63-7.70 (m, 3H,  $\text{ArH}$ -6, 7, 8) and 7.86 (d, 1H,  $J = 8.3$  Hz,  $\text{ArH}$ -5)

$^{13}\text{C-NMR}$  (75 MHz,  $\text{CDCl}_3$ , E, Z mixture): 16.8, 93.8, 94.2, 94.3, 95.1, 105.6, 105.7, 117.6, 118.5, 118.7, 119.0, 119.6, 119.7, 119.9, 124.3, 127.8, 128.8, 129.5, 130.3, 130.4, 130.6, 132.1, 132.3, 133.9, 144.9, 147.7, 148.3, 150.4, 152.6, 153.1, 161.5 and 161.6

HRMS (+ESI):  $\text{C}_{27}\text{H}_{21}\text{N}_4\text{O}$   $[\text{M}+\text{H}]^+$  requires 417.1710, found 417.1701

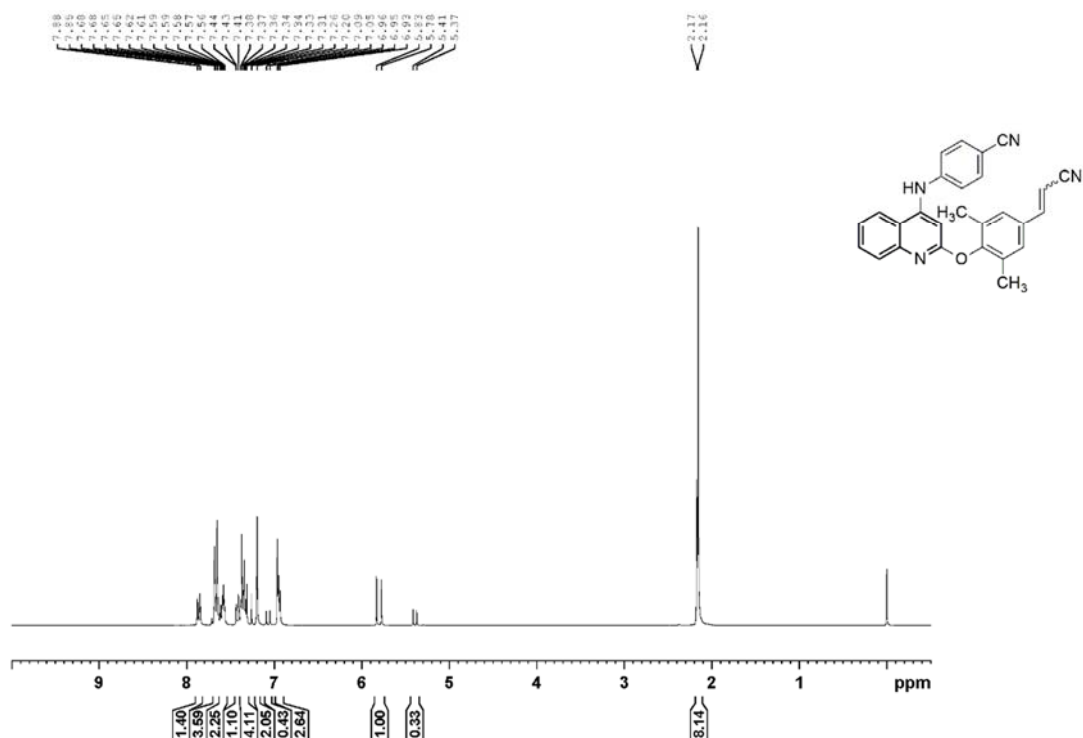

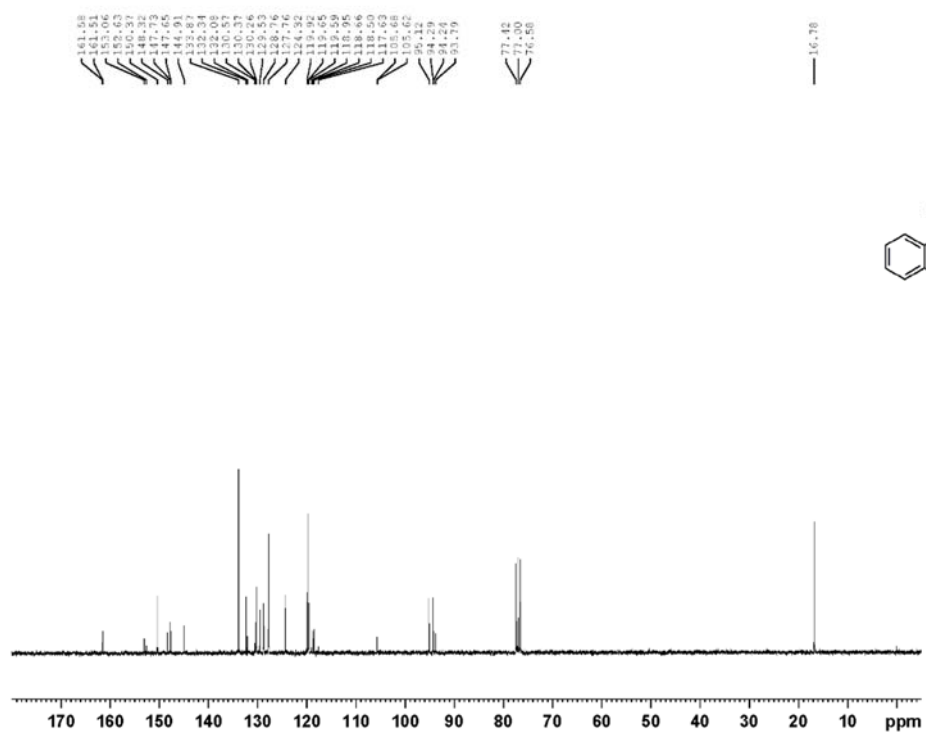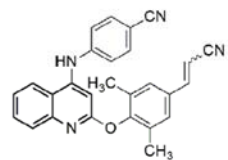

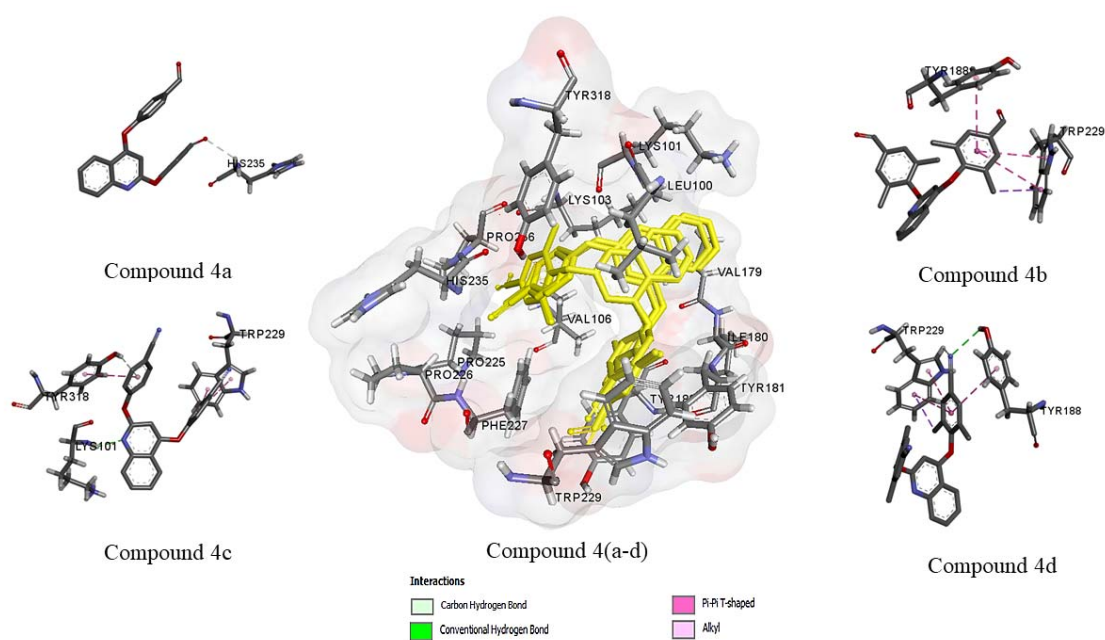

**Figure 1S.** The binding interaction between the compound 4(a-d) and HIV-1 RT using molecular docking.

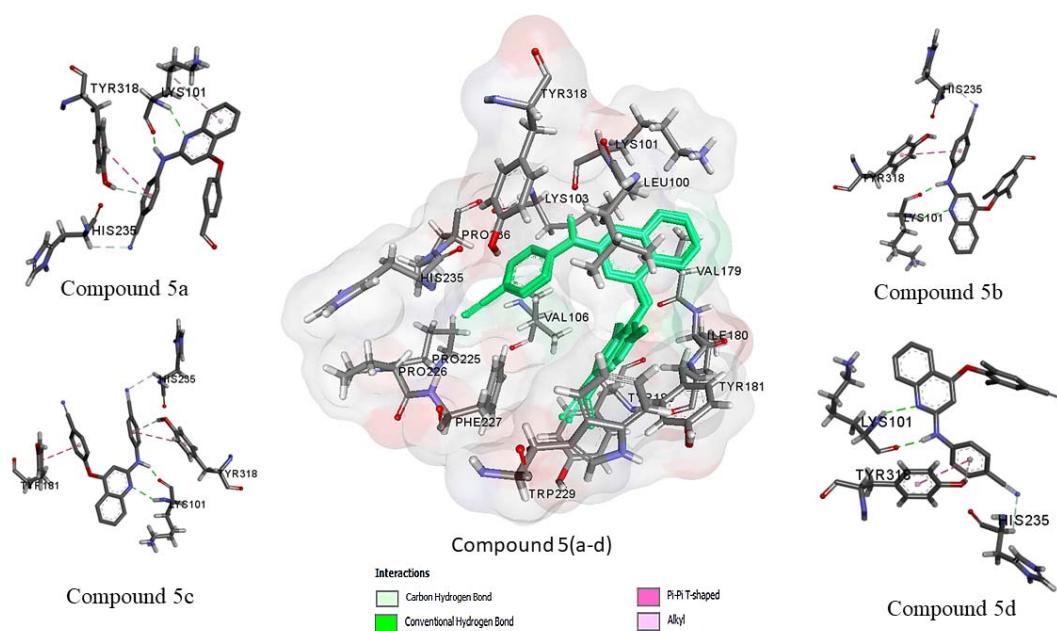

**Figure 2S.** The binding interaction between the compound 5(a-d) and HIV-1 RT using molecular docking.

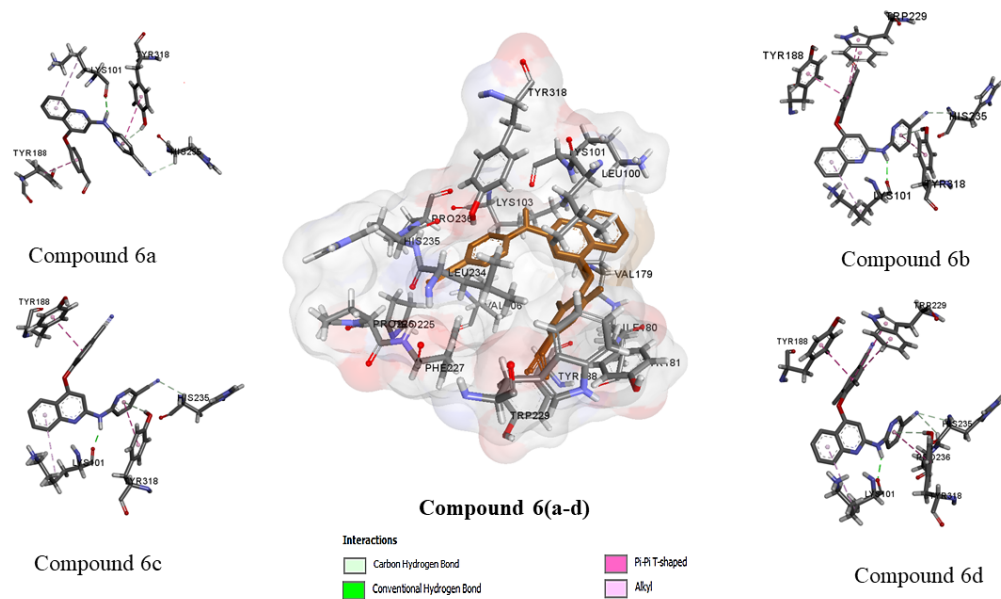

**Figure 3S.** The binding interaction between the compound 6(a-d) and HIV-1 RT using molecular docking.

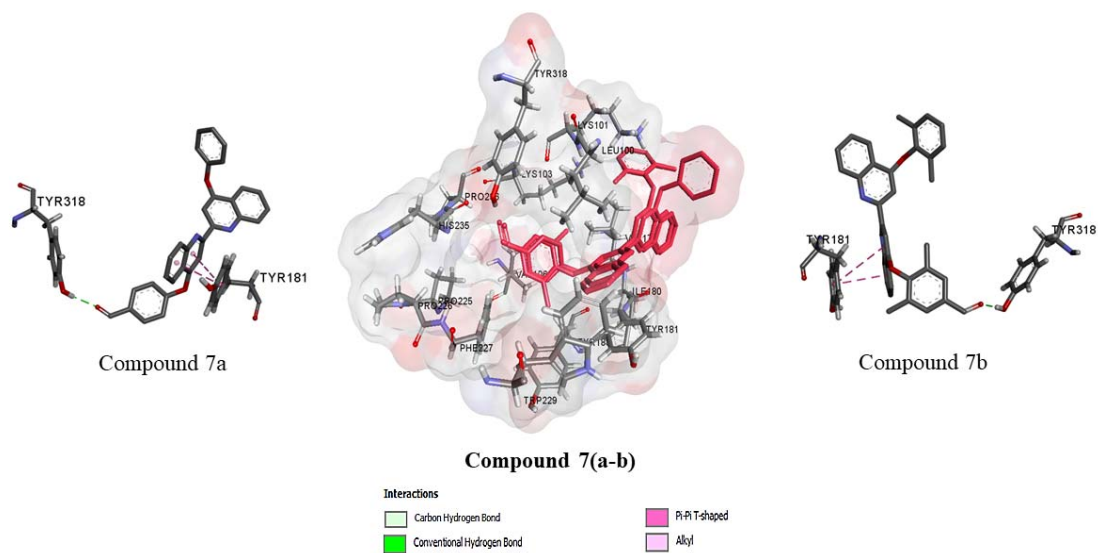

**Figure 4S.** The binding interaction between the compound 7(a-b) and HIV-1 RT using molecular docking.

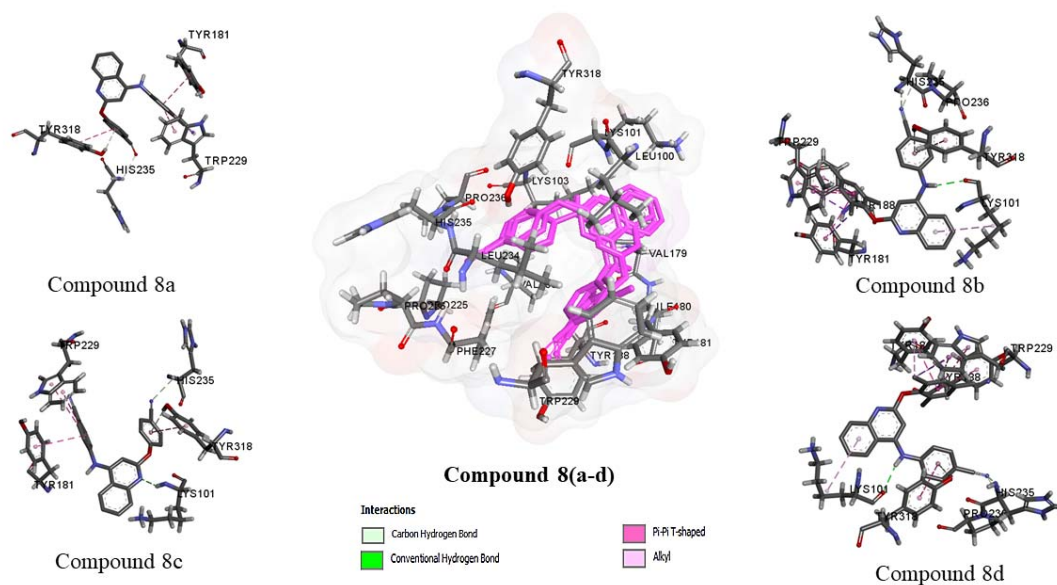

**Figure 5S.** The binding interaction between the compound 8(a-d) and HIV-1 RT using molecular docking.

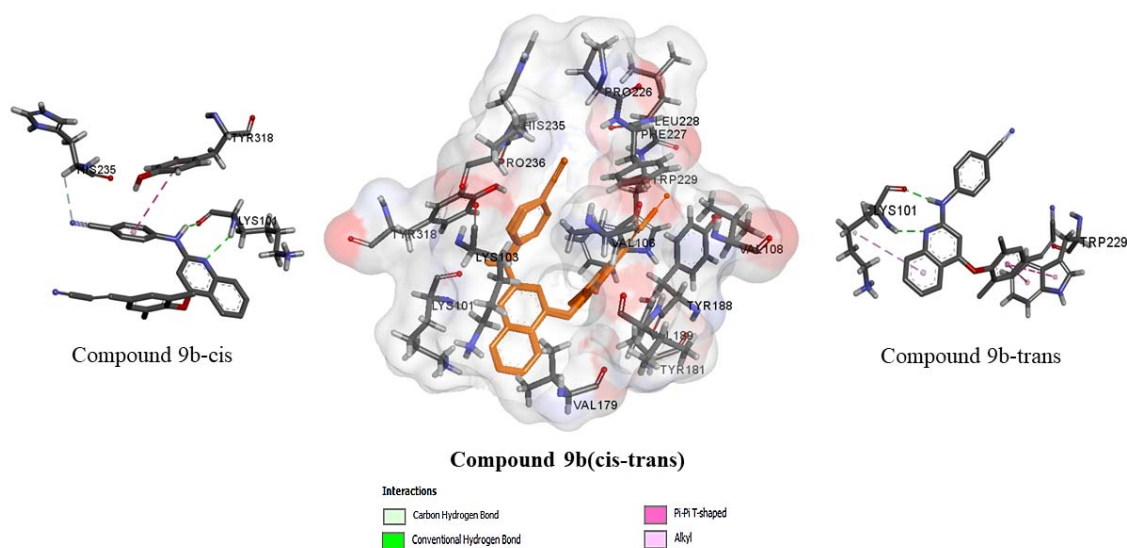

**Figure 6S.** The binding interaction between the compound 9b(cis-trans) and HIV-1 RT using molecular docking.

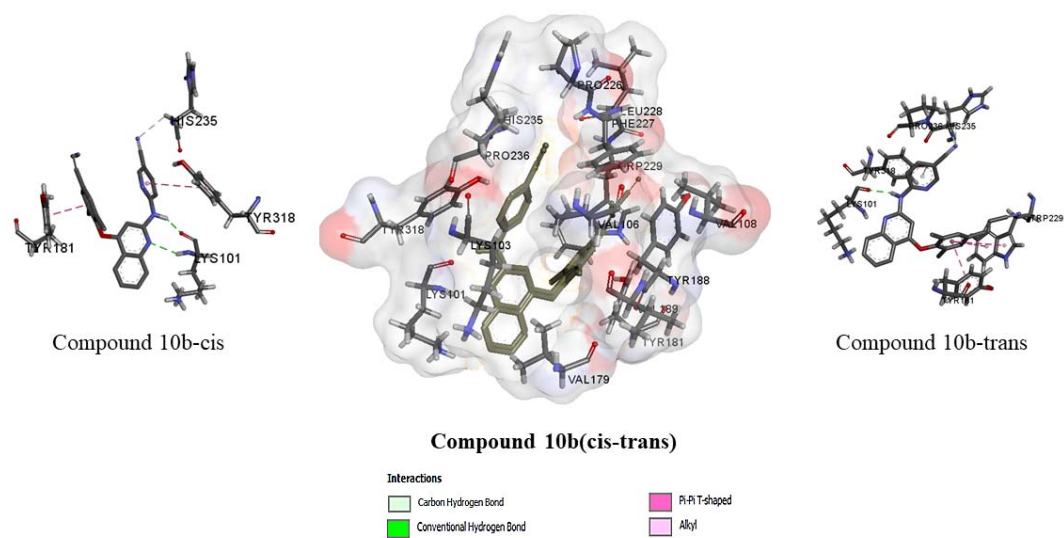

**Figure 7S.** The binding interaction between the compound 10b(cis-trans) and HIV-1 RT using molecular docking.

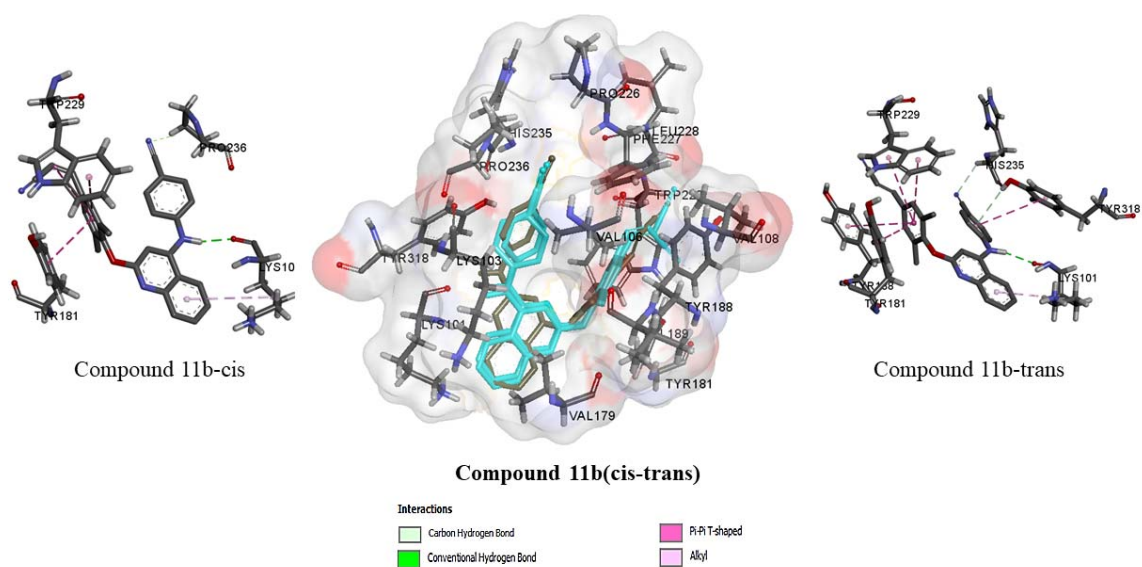

**Figure 8S.** The binding interaction between the compound 11b(cis-trans) and HIV-1 RT using molecular docking.

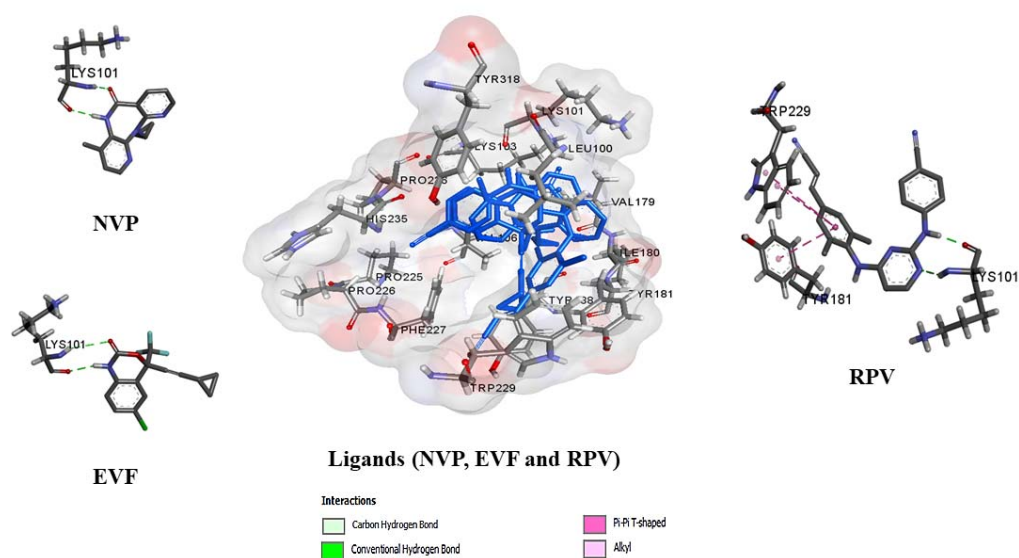

**Figure 9S.** The binding interaction between ligands (NVP, EVF and RPV) and HIV-1 RT using molecular docking.
